# Supplementary material
Source: PubMed Central journal article supplement (PMC3753923)
Supplement: MCB.01674-12_zmb999100077so1.pdf [file MCB.01674-12_zmb999100077so1.pdf]

## Supplemental Material

### Supplemental Table Legends

**Table S1** Multi-comparison *common* gene probe lists were generated based on the gene expression comparison criteria for C/EBP $\beta$ -3T3<sup>RasV12</sup> vs. 3T3<sup>RasV12</sup> [ $\geq$ +1.5-fold;  $p \leq 0.05$ ], *Cebpb*<sup>-/-</sup>/Ras<sup>V12</sup> vs. *WT*/Ras<sup>V12</sup> MEFs [ $\leq$ -1.5-fold;  $p \leq 0.05$ ], and *Cebpg*<sup>-/-</sup> vs. *WT* MEFs [ $\geq$ +1.5-fold;  $p \leq 0.05$ ]. Table titles and number of probes are listed below.

**Table S1a:** Probe set for C/EBP $\beta$ -3T3<sup>RasV12</sup> vs. 3T3<sup>RasV12</sup> (1203 probes)

**Table S1b:** Probe set for *Cebpg*<sup>-/-</sup> vs. *WT* MEFs (657 probes)

**Table S1c:** Probe set for *Cebpb*<sup>-/-</sup>/Ras<sup>V12</sup> vs. *WT*/Ras<sup>V12</sup> MEFs (650 probes)

**Table S1d:** Common probes between C/EBP $\beta$ -3T3<sup>RasV12</sup> vs. 3T3<sup>RasV12</sup> and *Cebpg*<sup>-/-</sup> vs. *WT* MEFs (137 probes)

**Table S1e:** Common probes between *Cebpb*<sup>-/-</sup>/Ras<sup>V12</sup> vs. *WT*/Ras<sup>V12</sup> MEFs and *Cebpg*<sup>-/-</sup> vs. *WT* MEFs (120 probes)

**Table S1f:** Common probes between C/EBP $\beta$ -3T3<sup>RasV12</sup> vs. 3T3<sup>RasV12</sup> and *Cebpb*<sup>-/-</sup>/Ras<sup>V12</sup> vs. *WT*/Ras<sup>V12</sup> MEFs (224 probes)

**Table S1g:** Common probes between C/EBP $\beta$ -3T3<sup>RasV12</sup> vs. 3T3<sup>RasV12</sup> and *Cebpg*<sup>-/-</sup> vs. *WT* MEFs and *Cebpb*<sup>-/-</sup>/Ras<sup>V12</sup> vs. *WT*/Ras<sup>V12</sup> MEFs (59 probes)

**Table S2** Multi-comparison *common* gene probe lists were generated based on the gene expression comparison criteria for C/EBP $\beta$ -3T3<sup>RasV12</sup> vs. 3T3<sup>RasV12</sup> [ $\geq$ +1.5-fold;  $p \leq 0.05$ ], *Cebpb*<sup>-/-</sup>/Ras<sup>V12</sup> vs. *WT*/Ras<sup>V12</sup> MEFs [ $\leq$ -1.5-fold;  $p \leq 0.05$ ], and *Cebpg*<sup>-/-</sup> vs. *WT* MEFs [ $\geq$ +1.5-fold;  $p \leq 0.05$ ] (see Supplementary Tables 1a-d). We further refined the probes lists to number of genes and generated *unique* gene set interactions tables, graphically represented in the Venn diagram (Figure 3A). Table titles and number of genes are listed below.

**Table S2a:** Unique gene set for C/EBP $\beta$ -3T3<sup>RasV12</sup> vs. 3T3<sup>RasV12</sup> (547 genes)

**Table S2b:** Unique gene set for *Cebpg*<sup>-/-</sup> vs. *WT* MEFs (328 genes)

**Table S2c:** Unique gene set for *Cebpb*<sup>-/-</sup>/Ras<sup>V12</sup> vs. *WT*/Ras<sup>V12</sup> MEFs (233 genes)

**Table S2d:** Unique gene set common to both C/EBP $\beta$ -3T3<sup>RasV12</sup> vs. 3T3<sup>RasV12</sup> and *Cebpg*<sup>-/-</sup> vs. *WT* MEFs (61 genes)

**Table S2e:** Unique gene set common to both C/EBP $\beta$ -3T3<sup>RasV12</sup> vs. 3T3<sup>RasV12</sup> and *Cebpb*<sup>-/-</sup>/Ras<sup>V12</sup> vs. *WT*/Ras<sup>V12</sup> MEFs (106 genes)

**Table S2f:** Unique gene set common to both *Cebpb*<sup>-/-</sup>/Ras<sup>V12</sup> vs. *WT*/Ras<sup>V12</sup> MEFs and *Cebpg*<sup>-/-</sup> vs. *WT* MEFs (48 genes)

**Table S2g:** Unique gene set common to C/EBP $\beta$ -3T3<sup>RasV12</sup> vs. 3T3<sup>RasV12</sup> and *Cebpg*<sup>-/-</sup> vs. *WT* MEFs and *Cebpb*<sup>-/-</sup>/Ras<sup>V12</sup> vs. *WT*/Ras<sup>V12</sup> MEFs (47 genes)



*Il1b (Mus musculus)*

```
aagcccctgctaacacagttgatggagagcacagaagcaccatccagttaccaaactccaactgcaaagctccctca
gcttaagcacaaggaggcgagagaggtgacacacttctgggtgtgcatctacgtgcctacctttgttccgcacatcc
tgacttaaaatgtacagctaaccaggaaaacccaatatttttaatttgacaccatctgcacaattgtccaggggg
aaataatgcccatttccaccacgatgacacacttgcgaatgtgtcactatctgccacccttgacttccagggatta
gaaattatttcagggttagcaatagcctcttcccctaagaaattcccatcaagcttctccccctccccacccttcag
ttttgttgtaaatacagttaacccaagggaaaatttcacagctcttcacttctgcttttttaggactataaaacaagg
+1
gagggaaaacaagttggacaacaaaccctgcagtggttCGAGGCCTAATAGGCTCATCTGGGATCCTCTCCAGCCAA
GCTTCCTTGTGCAAGTGTCTGAAGCAGCTATG
```

**SUPPLEMENTAL REFERENCES**

1. Akira, S., H. Isshiki, T. Sugita, O. Tanabe, S. Kinoshita, Y. Nishio, T. Nakajima, T. Hirano, and T. Kishimoto. 1990. A nuclear factor for IL-6 expression (NF-IL6) is a member of a C/EBP family. *Embo Journal* **9**:1897-1906.
