# Supplementary material
Source: PubMed Central journal article supplement (PMC3753923)
Supplement: MCB.01674-12_zmb999100077so2.pdf [file MCB.01674-12_zmb999100077so2.pdf]

Table S1a. Probe set for C/EBPβ-3T3<sup>RasV12</sup> vs. 3T3<sup>RasV12</sup> (1203 probes)

| ProbeID      | Gene Symbol | Fold Change | p-value   |
|--------------|-------------|-------------|-----------|
| 1419709_at   | Stfa3       | 596.41      | 4.57E-108 |
| 1449015_at   | Retnla      | 357.12      | 4.70E-107 |
| 1419394_s_at | S100a8      | 299.39      | 5.72E-107 |
| 1427747_a_at | Lcn2        | 359.02      | 4.85E-94  |
| 1420330_at   | Clec4e      | 74.50       | 1.05E-88  |
| 1419082_at   | Serpinb2    | 99.32       | 1.94E-88  |
| 1436671_at   | Vsig8       | 66.85       | 7.35E-88  |
| 1419209_at   | Cxcl1       | 82.21       | 3.26E-82  |
| 1422672_at   | Sprr1b      | 191.35      | 2.55E-81  |
| 1460667_at   | U90926      | 65.84       | 8.41E-81  |
| 1419136_at   | Akr1c18     | 32.73       | 2.18E-77  |
| 1419728_at   | Cxcl5       | 37.31       | 1.06E-73  |
| 1453593_at   | Vgll3       | 46.00       | 1.84E-73  |
| 1434458_at   | Fst         | 30.11       | 9.48E-72  |
| 1422411_s_at | NA          | 26.46       | 1.45E-71  |
| 1415904_at   | Lpl         | 33.57       | 3.87E-71  |
| 1418666_at   | Ptx3        | 30.62       | 4.82E-69  |
| 1430596_s_at | Vgll3       | 34.37       | 5.05E-68  |
| 1450883_a_at | Cd36        | 47.41       | 6.33E-68  |
| 1421365_at   | Fst         | 24.51       | 1.51E-67  |
| 1421811_at   | Thbs1       | 19.72       | 5.15E-67  |
| 1455299_at   | Vgll3       | 30.22       | 5.94E-67  |
| 1460302_at   | Thbs1       | 17.97       | 4.50E-66  |
| 1457644_s_at | Cxcl1       | 33.21       | 6.07E-66  |
| 1417785_at   | Pla1a       | 18.28       | 1.48E-63  |
| 1418423_s_at | NA          | 26.72       | 1.04E-62  |
| 1422412_x_at | Ear3        | 15.62       | 4.28E-62  |
| 1451537_at   | Chi3l1      | 14.90       | 4.28E-62  |
| 1439878_at   | Ivl         | 14.55       | 6.39E-60  |
| 1450377_at   | Thbs1       | 13.18       | 1.73E-59  |
| 1416702_at   | Serpini1    | 14.13       | 1.40E-58  |
| 1422240_s_at | Sprr2h      | 69.24       | 1.55E-58  |
| 1422603_at   | Rnase4      | 13.74       | 8.24E-57  |
| 1425078_x_at | NA          | 11.66       | 3.85E-56  |
| 1448443_at   | Serpini1    | 13.99       | 4.85E-56  |
| 1421403_at   | Pi15        | 13.79       | 6.08E-56  |
| 1421207_at   | Lif         | 11.06       | 1.22E-55  |
| 1419609_at   | Ccr1        | 11.30       | 7.92E-55  |
| 1448377_at   | Slpi        | 10.27       | 1.08E-53  |
| 1418907_at   | F5          | 10.42       | 5.35E-53  |
| 1452418_at   | NA          | 12.16       | 3.16E-52  |
| 1422587_at   | Tmem45a     | 11.81       | 3.29E-52  |
| 1421473_at   | Il1a        | 25.82       | 5.47E-52  |
| 1428758_at   | Tmem86a     | 9.13        | 8.56E-51  |
| 1418674_at   | Osmr        | 9.89        | 2.47E-50  |
| 1448532_at   | Prl8a9      | 28.55       | 5.20E-50  |
| 1436987_at   | Ism1        | 8.71        | 8.37E-50  |
| 1452614_at   | Bcl2l15     | 10.08       | 3.28E-49  |
| 1423166_at   | Cd36        | 16.77       | 1.70E-48  |
| 1423954_at   | C3          | 16.62       | 1.98E-48  |
| 1419610_at   | Ccr1        | 9.80        | 2.10E-48  |
| 1432517_a_at | Nnmt        | 9.78        | 3.74E-48  |

|              |               |       |          |
|--------------|---------------|-------|----------|
| 1434484_at   | 1100001G20Rik | 17.28 | 1.94E-47 |
| 1449038_at   | Hsd11b1       | 8.18  | 2.09E-47 |
| 1419691_at   | Camp          | 16.37 | 4.84E-47 |
| 1438133_a_at | Cyr61         | 7.70  | 5.64E-47 |
| 1434411_at   | Col12a1       | 11.04 | 6.43E-47 |
| 1422222_at   | Ivl           | 7.81  | 1.12E-46 |
| 1426818_at   | Arrdc4        | 7.70  | 7.46E-46 |
| 1450165_at   | Slfn2         | 8.70  | 1.46E-45 |
| 1448748_at   | Plek          | 7.75  | 1.50E-45 |
| 1450297_at   | Il6           | 9.88  | 1.50E-45 |
| 1436996_x_at | Lyz1          | 10.60 | 2.47E-45 |
| 1419225_at   | Cacna2d3      | 7.80  | 2.70E-45 |
| 1419534_at   | Olr1          | 8.14  | 1.57E-44 |
| 1425295_at   | Ear11         | 7.93  | 2.41E-44 |
| 1453943_a_at | Acpp          | 10.39 | 3.71E-44 |
| 1416039_x_at | Cyr61         | 6.99  | 4.52E-44 |
| 1417483_at   | Nfkbiz        | 7.66  | 1.21E-43 |
| 1453092_at   | Crct1         | 10.76 | 1.27E-43 |
| 1423544_at   | Ptpn5         | 7.30  | 2.16E-43 |
| 1416239_at   | Ass1          | 8.48  | 3.26E-43 |
| 1417263_at   | Ptgs2         | 6.98  | 3.39E-43 |
| 1419721_at   | Niacr1        | 11.30 | 8.88E-43 |
| 1417523_at   | Plek          | 6.88  | 6.63E-42 |
| 1419004_s_at | NA            | 6.55  | 1.08E-41 |
| 1448749_at   | Plek          | 6.39  | 1.08E-41 |
| 1418945_at   | Mmp3          | 7.31  | 2.03E-41 |
| 1442187_at   | Bdkrb2        | 6.15  | 3.71E-41 |
| 1431056_a_at | Lpl           | 7.77  | 5.65E-41 |
| 1426318_at   | Serpinb1b     | 6.87  | 1.33E-40 |
| 1435660_at   | LOC664787     | 6.85  | 1.34E-40 |
| 1449130_at   | Cd1d1         | 8.07  | 2.01E-40 |
| 1422155_at   | Hist2h3c2-ps  | 6.48  | 2.32E-40 |
| 1429060_at   | Malat1        | 5.96  | 9.40E-40 |
| 1456248_at   | Lce3f         | 5.97  | 1.15E-39 |
| 1441855_x_at | Cxcl1         | 8.50  | 1.30E-39 |
| 1428720_s_at | NA            | 8.73  | 2.35E-39 |
| 1420804_s_at | Clec4d        | 5.73  | 4.39E-39 |
| 1432432_a_at | Rab3c         | 5.60  | 6.93E-39 |
| 1457035_at   | Al607873      | 6.05  | 7.31E-39 |
| 1422177_at   | Il13ra2       | 6.45  | 9.55E-39 |
| 1422425_at   | Sprr2k        | 8.21  | 1.30E-38 |
| 1449131_s_at | Cd1d1         | 7.43  | 1.81E-38 |
| 1452348_s_at | NA            | 5.82  | 5.83E-38 |
| 1449269_at   | F5            | 5.41  | 8.83E-38 |
| 1420361_at   | Slc11a1       | 7.01  | 1.21E-37 |
| 1428719_at   | NA            | 7.00  | 1.56E-37 |
| 1415897_a_at | Mgst1         | 5.40  | 5.06E-37 |
| 1420331_at   | Clec4e        | 5.46  | 8.54E-37 |
| 1420413_at   | Slc7a11       | 8.94  | 8.62E-37 |
| 1422860_at   | Nts           | 8.27  | 2.11E-36 |
| 1442340_x_at | Cyr61         | 5.81  | 2.11E-36 |
| 1435792_at   | NA            | 5.35  | 5.96E-36 |
| 1429348_at   | Sema3c        | 5.12  | 1.04E-35 |
| 1455627_at   | Col8a1        | 6.35  | 2.59E-35 |
| 1450160_at   | Lif           | 5.16  | 3.88E-35 |

|              |           |       |          |
|--------------|-----------|-------|----------|
| 1452540_a_at | NA        | 5.09  | 3.98E-35 |
| 1417262_at   | Ptgs2     | 5.07  | 6.80E-35 |
| 1449494_at   | Rab3c     | 4.75  | 1.76E-34 |
| 1418675_at   | Osmr      | 4.91  | 1.91E-34 |
| 1448881_at   | Hp        | 5.61  | 1.97E-34 |
| 1428014_at   | Hist1h4h  | 5.04  | 2.61E-34 |
| 1416077_at   | Adm       | 4.83  | 3.63E-34 |
| 1420696_at   | Sema3c    | 4.80  | 4.12E-34 |
| 1449366_at   | Mmp8      | 4.88  | 4.50E-34 |
| 1418072_at   | Hist1h2bc | 4.81  | 4.75E-34 |
| 1457823_at   | Cyr61     | 5.25  | 4.79E-34 |
| 1447676_x_at | S100a16   | 4.97  | 6.32E-34 |
| 1451866_a_at | Hgf       | 4.81  | 7.00E-34 |
| 1439036_a_at | Atp1b1    | 4.84  | 1.52E-33 |
| 1416593_at   | Glrx      | 4.62  | 2.61E-33 |
| 1451006_at   | Xdh       | 4.56  | 3.31E-33 |
| 1429273_at   | Bmper     | 4.72  | 4.79E-33 |
| 1450811_at   | Sprr2j-ps | 12.06 | 5.33E-33 |
| 1452349_x_at | NA        | 5.08  | 5.59E-33 |
| 1437250_at   | Mreg      | 5.09  | 9.67E-33 |
| 1419603_at   | Ifi204    | 5.21  | 9.76E-33 |
| 1449846_at   | Ear2      | 4.68  | 1.10E-32 |
| 1419853_a_at | P2rx7     | 5.15  | 1.16E-32 |
| 1426235_a_at | Glul      | 4.50  | 3.87E-32 |
| 1449875_s_at | NA        | 4.85  | 2.26E-31 |
| 1420641_a_at | Sqrdl     | 4.25  | 2.77E-31 |
| 1425379_at   | Hgf       | 4.29  | 4.22E-31 |
| 1422140_at   | NA        | 4.28  | 6.26E-31 |
| 1416592_at   | Glrx      | 4.25  | 8.86E-31 |
| 1439191_at   | NA        | 4.46  | 1.63E-30 |
| 1458634_at   | NA        | 4.27  | 1.96E-30 |
| 1447830_s_at | Rgs2      | 4.43  | 2.09E-30 |
| 1437052_s_at | Slc2a3    | 4.15  | 2.22E-30 |
| 1417633_at   | Sod3      | 4.11  | 7.28E-30 |
| 1419832_s_at | Acpp      | 6.02  | 9.21E-30 |
| 1449507_a_at | Cd47      | 3.97  | 1.86E-29 |
| 1418440_at   | Col8a1    | 4.39  | 3.14E-29 |
| 1419473_a_at | Cck       | 3.99  | 3.53E-29 |
| 1419248_at   | Rgs2      | 4.12  | 3.73E-29 |
| 1448728_a_at | Nfkbiz    | 4.04  | 4.07E-29 |
| 1419099_x_at | Stom      | 3.95  | 4.46E-29 |
| 1422437_at   | Col5a2    | 4.01  | 7.41E-29 |
| 1418612_at   | Slfn1     | 7.01  | 7.79E-29 |
| 1422963_at   | Sprr2i    | 9.05  | 9.50E-29 |
| 1442884_at   | Hgf       | 3.84  | 3.97E-28 |
| 1418678_at   | Has2      | 3.93  | 5.06E-28 |
| 1418061_at   | Ltbp2     | 3.91  | 5.60E-28 |
| 1417805_at   | Xpnpep2   | 3.86  | 6.17E-28 |
| 1422010_at   | Tlr7      | 4.51  | 6.17E-28 |
| 1448162_at   | Vcam1     | 3.91  | 6.48E-28 |
| 1419098_at   | Stom      | 3.82  | 7.22E-28 |
| 1422243_at   | Fgf7      | 3.78  | 8.69E-28 |
| 1418752_at   | Aldh3a1   | 4.06  | 9.26E-28 |
| 1425503_at   | Gcnt2     | 4.21  | 9.55E-28 |
| 1418774_a_at | Atp7a     | 3.93  | 1.07E-27 |

|              |               |      |          |
|--------------|---------------|------|----------|
| 1425560_a_at | S100a16       | 3.90 | 1.10E-27 |
| 1418454_at   | Mfap5         | 3.79 | 1.23E-27 |
| 1449591_at   | Casp4         | 3.70 | 1.80E-27 |
| 1439834_at   | 2400009B08Rik | 4.05 | 2.18E-27 |
| 1449585_at   | Il1rap        | 3.79 | 2.27E-27 |
| 1448756_at   | S100a9        | 4.72 | 2.82E-27 |
| 1426236_a_at | Glul          | 3.76 | 2.91E-27 |
| 1429930_at   | Ccdc19        | 3.99 | 3.56E-27 |
| 1450625_at   | Col5a2        | 3.88 | 6.38E-27 |
| 1419748_at   | Abcd2         | 3.77 | 1.09E-26 |
| 1424759_at   | Arrdc4        | 3.66 | 1.51E-26 |
| 1419247_at   | Rgs2          | 3.69 | 1.88E-26 |
| 1449677_s_at | Tmem38b       | 3.90 | 2.00E-26 |
| 1433545_s_at | Acad11        | 3.83 | 2.06E-26 |
| 1419097_a_at | Stom          | 3.58 | 2.29E-26 |
| 1449519_at   | Gadd45a       | 3.86 | 2.36E-26 |
| 1448259_at   | Fstl1         | 3.65 | 2.97E-26 |
| 1430826_s_at | Gcnt2         | 3.83 | 2.98E-26 |
| 1450791_at   | Nppb          | 4.03 | 3.32E-26 |
| 1456046_at   | Cd93          | 3.85 | 3.45E-26 |
| 1449341_a_at | Stom          | 3.55 | 3.76E-26 |
| 1419589_at   | Cd93          | 3.66 | 4.41E-26 |
| 1422561_at   | Adamts5       | 3.82 | 4.95E-26 |
| 1460011_at   | Cyp26b1       | 3.62 | 5.99E-26 |
| 1449252_at   | Fam110c       | 3.54 | 7.28E-26 |
| 1417268_at   | Cd14          | 3.54 | 1.72E-25 |
| 1443536_at   | Slc7a11       | 4.52 | 1.78E-25 |
| 1424524_at   | Dram1         | 3.63 | 1.99E-25 |
| 1441975_at   | Acpp          | 3.77 | 3.22E-25 |
| 1436988_at   | lsm1          | 3.45 | 4.27E-25 |
| 1438910_a_at | Stom          | 3.41 | 4.90E-25 |
| 1459897_a_at | Sbsn          | 3.41 | 5.27E-25 |
| 1437218_at   | Fn1           | 3.56 | 6.12E-25 |
| 1422141_s_at | Csprs         | 3.45 | 7.41E-25 |
| 1436921_at   | Atp7a         | 3.43 | 8.97E-25 |
| 1421304_at   | Klra2         | 3.66 | 1.09E-24 |
| 1452353_at   | Gpr155        | 3.72 | 1.14E-24 |
| 1418932_at   | Nfil3         | 3.36 | 1.16E-24 |
| 1439426_x_at | NA            | 4.85 | 1.27E-24 |
| 1438405_at   | Fgf7          | 3.38 | 1.56E-24 |
| 1424256_at   | Rdh12         | 4.16 | 1.69E-24 |
| 1436528_at   | Kazald1       | 3.40 | 2.34E-24 |
| 1448529_at   | Thbd          | 3.36 | 3.17E-24 |
| 1431106_a_at | 9530053H05Rik | 3.34 | 3.23E-24 |
| 1416221_at   | Fstl1         | 3.42 | 3.43E-24 |
| 1454745_at   | Arhgap29      | 3.86 | 4.89E-24 |
| 1452296_at   | Slit3         | 3.36 | 5.83E-24 |
| 1424186_at   | Ccdc80        | 3.37 | 5.86E-24 |
| 1439630_x_at | Sbsn          | 3.28 | 5.89E-24 |
| 1426081_a_at | Dio2          | 3.71 | 5.99E-24 |
| 1449133_at   | Sprr1a        | 3.33 | 6.20E-24 |
| 1419554_at   | Cd47          | 3.28 | 6.67E-24 |
| 1441559_at   | 3110082D06Rik | 3.51 | 7.01E-24 |
| 1427348_at   | Zc3h12a       | 3.49 | 7.31E-24 |
| 1442051_at   | Hist2h3c1     | 3.30 | 9.01E-24 |

|              |           |      |          |
|--------------|-----------|------|----------|
| 1460251_at   | Fas       | 3.51 | 1.28E-23 |
| 1415989_at   | Vcam1     | 3.32 | 1.59E-23 |
| 1415996_at   | Txnip     | 3.23 | 1.91E-23 |
| 1456344_at   | Tnc       | 3.32 | 3.07E-23 |
| 1425985_s_at | Masp1     | 3.19 | 3.20E-23 |
| 1426642_at   | Fn1       | 3.20 | 3.75E-23 |
| 1433699_at   | Tnfaip3   | 3.41 | 4.86E-23 |
| 1415997_at   | Txnip     | 3.17 | 6.89E-23 |
| 1427167_at   | NA        | 3.32 | 7.41E-23 |
| 1419647_a_at | Ier3      | 3.16 | 1.40E-22 |
| 1456404_at   | Adamts5   | 3.46 | 1.51E-22 |
| 1427102_at   | Slfn4     | 3.59 | 1.62E-22 |
| 1449314_at   | Zfpm2     | 4.22 | 1.85E-22 |
| 1418937_at   | Dio2      | 3.20 | 2.38E-22 |
| 1418422_at   | Serpib9g  | 3.65 | 2.69E-22 |
| 1454647_at   | Acad11    | 3.24 | 3.40E-22 |
| 1418188_a_at | NA        | 3.17 | 4.24E-22 |
| 1458943_at   | NA        | 3.15 | 7.18E-22 |
| 1427285_s_at | Malat1    | 3.14 | 7.36E-22 |
| 1418879_at   | Fam110c   | 3.08 | 8.69E-22 |
| 1427429_at   | Csf2      | 3.58 | 1.03E-21 |
| 1450586_at   | Bdkrb1    | 3.07 | 1.03E-21 |
| 1456544_at   | Tmem38b   | 3.19 | 1.28E-21 |
| 1424700_at   | Tmem38b   | 3.16 | 1.36E-21 |
| 1440739_at   | Vegfc     | 3.59 | 1.63E-21 |
| 1438684_at   | Nuak1     | 3.15 | 1.65E-21 |
| 1456387_at   | Nol4      | 3.16 | 2.20E-21 |
| 1426452_a_at | Rab30     | 3.29 | 2.61E-21 |
| 1423277_at   | Ptprk     | 3.05 | 3.40E-21 |
| 1448610_a_at | Sod2      | 3.20 | 5.06E-21 |
| 1417426_at   | Srgn      | 5.74 | 5.10E-21 |
| 1448228_at   | Lox       | 2.96 | 5.83E-21 |
| 1460273_a_at | Naip2     | 3.15 | 5.98E-21 |
| 1460416_s_at | NA        | 3.01 | 6.06E-21 |
| 1417256_at   | Mmp13     | 4.06 | 8.99E-21 |
| 1416121_at   | Lox       | 2.95 | 1.12E-20 |
| 1451388_a_at | Atp11b    | 3.04 | 1.18E-20 |
| 1427515_at   | Pion      | 2.95 | 1.26E-20 |
| 1419431_at   | Ereg      | 2.92 | 1.34E-20 |
| 1428187_at   | Cd47      | 3.02 | 1.77E-20 |
| 1425868_at   | Hist2h2bb | 2.99 | 1.97E-20 |
| 1450700_at   | Cdc42ep3  | 2.92 | 2.02E-20 |
| 1418189_s_at | NA        | 3.03 | 2.24E-20 |
| 1423547_at   | Lyz2      | 3.05 | 2.53E-20 |
| 1447839_x_at | Adm       | 2.97 | 2.74E-20 |
| 1420591_at   | Gpr84     | 3.45 | 3.27E-20 |
| 1429321_at   | Rnf149    | 2.92 | 3.94E-20 |
| 1436530_at   | Gm11428   | 3.89 | 4.41E-20 |
| 1422642_at   | Cdc42ep3  | 2.86 | 4.49E-20 |
| 1416250_at   | Btg2      | 2.86 | 5.39E-20 |
| 1452141_a_at | Sepp1     | 2.90 | 1.03E-19 |
| 1421415_s_at | Gcnt2     | 2.88 | 1.04E-19 |
| 1429144_at   | Gpcpd1    | 2.83 | 1.22E-19 |
| 1449169_at   | Has2      | 2.83 | 1.30E-19 |
| 1421840_at   | Abca1     | 2.84 | 1.33E-19 |

|              |               |      |          |
|--------------|---------------|------|----------|
| 1442015_at   | 2500002B13Rik | 2.81 | 1.44E-19 |
| 1446791_at   | Pi15          | 3.02 | 1.57E-19 |
| 1419417_at   | Vegfc         | 3.35 | 1.97E-19 |
| 1455346_at   | Masp1         | 2.95 | 2.05E-19 |
| 1419208_at   | Map3k8        | 2.86 | 2.25E-19 |
| 1450757_at   | Cdh11         | 2.89 | 2.29E-19 |
| 1439002_s_at | NA            | 5.61 | 2.44E-19 |
| 1449310_at   | Ptger2        | 2.96 | 2.87E-19 |
| 1452378_at   | Malat1        | 2.83 | 3.54E-19 |
| 1438403_s_at | Malat1        | 2.81 | 3.86E-19 |
| 1439814_at   | Atp8b4        | 2.83 | 4.33E-19 |
| 1417193_at   | Sod2          | 2.87 | 6.48E-19 |
| 1416612_at   | Cyp1b1        | 2.83 | 6.56E-19 |
| 1418546_a_at | Stambpl1      | 2.86 | 7.87E-19 |
| 1438602_s_at | Masp1         | 2.76 | 8.43E-19 |
| 1434432_at   | Rffl          | 2.84 | 8.65E-19 |
| 1416727_a_at | Cyb5          | 2.74 | 9.32E-19 |
| 1416926_at   | Trp53inp1     | 2.85 | 1.15E-18 |
| 1416666_at   | Serpine2      | 2.73 | 1.18E-18 |
| 1427005_at   | Plk2          | 2.83 | 1.19E-18 |
| 1439830_at   | Map3k5        | 2.96 | 1.54E-18 |
| 1435749_at   | Gda           | 2.84 | 1.58E-18 |
| 1455063_at   | Fam82a1       | 2.76 | 1.58E-18 |
| 1444763_at   | Ptprk         | 2.73 | 1.65E-18 |
| 1416527_at   | Rab32         | 2.76 | 1.74E-18 |
| 1439766_x_at | Vegfc         | 3.21 | 2.13E-18 |
| 1420603_s_at | NA            | 2.73 | 2.33E-18 |
| 1435120_at   | NA            | 2.92 | 2.51E-18 |
| 1418213_at   | Krt23         | 2.71 | 2.91E-18 |
| 1418367_x_at | NA            | 2.72 | 3.30E-18 |
| 1428025_s_at | Pitpnc1       | 2.71 | 3.35E-18 |
| 1438035_at   | Fam82a1       | 2.72 | 4.25E-18 |
| 1435363_at   | Plekhg1       | 2.69 | 4.28E-18 |
| 1427762_x_at | Hist1h2bp     | 2.73 | 4.62E-18 |
| 1429987_at   | 9930013L23Rik | 2.75 | 4.67E-18 |
| 1418441_at   | Col8a1        | 2.96 | 5.35E-18 |
| 1429639_at   | Gpcpd1        | 2.66 | 6.30E-18 |
| 1451479_a_at | Tmem53        | 2.66 | 6.58E-18 |
| 1422948_s_at | NA            | 2.70 | 6.58E-18 |
| 1419427_at   | Csf3          | 3.28 | 7.32E-18 |
| 1447819_x_at | Col8a1        | 2.73 | 9.49E-18 |
| 1424607_a_at | Gm4354        | 2.65 | 1.00E-17 |
| 1445678_at   | NA            | 2.76 | 1.00E-17 |
| 1456195_x_at | Itgb5         | 2.68 | 1.10E-17 |
| 1418366_at   | NA            | 2.66 | 1.56E-17 |
| 1440397_at   | Cacna2d1      | 2.67 | 1.61E-17 |
| 1435748_at   | Gda           | 2.64 | 1.66E-17 |
| 1416630_at   | Id3           | 2.68 | 1.69E-17 |
| 1429678_at   | 5730508B09Rik | 2.67 | 2.24E-17 |
| 1417634_at   | Sod3          | 2.62 | 2.25E-17 |
| 1417789_at   | Ccl11         | 2.93 | 2.39E-17 |
| 1423571_at   | S1pr1         | 2.66 | 2.42E-17 |
| 1438036_x_at | Fam82a1       | 2.74 | 2.54E-17 |
| 1424854_at   | NA            | 2.71 | 2.59E-17 |
| 1450658_at   | Adamts5       | 2.71 | 2.70E-17 |

|              |               |      |          |
|--------------|---------------|------|----------|
| 1444615_x_at | Runx1t1       | 2.70 | 3.31E-17 |
| 1456001_at   | Lce3a         | 2.59 | 3.61E-17 |
| 1422723_at   | Stra6         | 2.68 | 3.94E-17 |
| 1424609_a_at | Gm4354        | 2.60 | 4.78E-17 |
| 1419537_at   | Tcfec         | 3.00 | 5.81E-17 |
| 1427086_at   | Slit3         | 2.57 | 8.24E-17 |
| 1421340_at   | Map3k5        | 2.71 | 9.26E-17 |
| 1421525_a_at | Naip5         | 2.65 | 1.15E-16 |
| 1417533_a_at | Itgb5         | 2.57 | 1.21E-16 |
| 1423278_at   | Ptprk         | 2.53 | 1.32E-16 |
| 1438097_at   | Rab20         | 2.61 | 1.48E-16 |
| 1424608_a_at | NA            | 2.53 | 1.51E-16 |
| 1434015_at   | Slc2a6        | 2.61 | 1.53E-16 |
| 1429399_at   | Rnf125        | 2.57 | 1.59E-16 |
| 1425814_a_at | Calcr1        | 2.56 | 1.82E-16 |
| 1434674_at   | Lyst          | 2.57 | 1.86E-16 |
| 1417516_at   | Ddit3         | 2.55 | 1.88E-16 |
| 1436223_at   | Itgb8         | 2.58 | 2.12E-16 |
| 1447100_s_at | 5730508B09Rik | 2.56 | 2.35E-16 |
| 1424724_a_at | D16Ertd472e   | 2.63 | 2.37E-16 |
| 1455660_at   | Csf2rb        | 2.64 | 2.49E-16 |
| 1423584_at   | NA            | 2.62 | 2.51E-16 |
| 1434556_at   | Tmem170b      | 2.57 | 2.58E-16 |
| 1451755_a_at | Apobec1       | 2.52 | 2.60E-16 |
| 1419561_at   | Ccl3          | 3.57 | 2.85E-16 |
| 1420394_s_at | NA            | 2.98 | 3.00E-16 |
| 1427717_at   | Cd80          | 2.63 | 3.12E-16 |
| 1422573_at   | Ampd3         | 2.80 | 3.23E-16 |
| 1434096_at   | Slc4a4        | 2.50 | 3.88E-16 |
| 1454976_at   | Sod2          | 2.58 | 4.34E-16 |
| 1456590_x_at | Akr1b3        | 2.56 | 4.43E-16 |
| 1426640_s_at | Trib2         | 2.47 | 8.14E-16 |
| 1451385_at   | Fam162a       | 2.49 | 9.20E-16 |
| 1434112_at   | Lphn2         | 2.49 | 9.77E-16 |
| 1454171_x_at | 9530053H05Rik | 2.46 | 1.05E-15 |
| 1430521_s_at | Cpne8         | 2.45 | 1.24E-15 |
| 1436125_at   | D16Ertd472e   | 2.54 | 1.26E-15 |
| 1425398_at   | NA            | 2.49 | 1.36E-15 |
| 1430367_at   | Stambpl1      | 2.50 | 1.50E-15 |
| 1431010_a_at | Rdh12         | 2.62 | 1.71E-15 |
| 1451314_a_at | Vcam1         | 2.53 | 2.34E-15 |
| 1429352_at   | Mocos         | 2.43 | 2.35E-15 |
| 1418492_at   | Grem2         | 2.52 | 2.35E-15 |
| 1449342_at   | Ptplb         | 2.58 | 2.63E-15 |
| 1460521_a_at | Obfc2a        | 2.53 | 3.05E-15 |
| 1426936_at   | NA            | 2.42 | 3.10E-15 |
| 1452207_at   | Cited2        | 2.41 | 3.55E-15 |
| 1422748_at   | Zeb2          | 2.44 | 3.55E-15 |
| 1452527_a_at | P2rx4         | 2.41 | 3.95E-15 |
| 1434140_at   | Mcf2l         | 2.42 | 4.05E-15 |
| 1416613_at   | Cyp1b1        | 2.39 | 4.51E-15 |
| 1420380_at   | Ccl2          | 2.41 | 4.61E-15 |
| 1432826_a_at | Cd80          | 2.45 | 4.72E-15 |
| 1416342_at   | Tnc           | 2.40 | 5.17E-15 |
| 1450769_s_at | Stard5        | 2.39 | 6.52E-15 |

|              |               |      |          |
|--------------|---------------|------|----------|
| 1448319_at   | Akr1b3        | 2.40 | 8.43E-15 |
| 1416893_at   | Fam107b       | 2.40 | 8.44E-15 |
| 1435955_at   | Siglecg       | 2.40 | 9.51E-15 |
| 1443004_at   | NA            | 2.55 | 9.56E-15 |
| 1435410_at   | Tcam1         | 2.38 | 1.08E-14 |
| 1424683_at   | Fam134b       | 2.38 | 1.27E-14 |
| 1451733_at   | Gcnt2         | 2.44 | 1.43E-14 |
| 1418489_a_at | Calcrl        | 2.40 | 1.45E-14 |
| 1450513_at   | Cd33          | 2.38 | 1.46E-14 |
| 1428942_at   | Mt2           | 2.37 | 1.46E-14 |
| 1426334_a_at | Bcl2l11       | 2.37 | 1.56E-14 |
| 1435462_at   | Plcx2         | 2.40 | 1.80E-14 |
| 1416101_a_at | Hist1h1c      | 2.38 | 1.85E-14 |
| 1435486_at   | Pak3          | 2.36 | 1.97E-14 |
| 1415848_at   | Prl3d1        | 2.88 | 1.97E-14 |
| 1457666_s_at | Ifi202b       | 2.36 | 2.22E-14 |
| 1460194_at   | Phyh          | 2.36 | 2.47E-14 |
| 1422678_at   | Dgat2         | 2.43 | 2.52E-14 |
| 1426604_at   | Rnasel        | 2.44 | 2.67E-14 |
| 1424349_a_at | Lpgat1        | 2.36 | 2.75E-14 |
| 1431394_a_at | Lrrk2         | 2.43 | 2.84E-14 |
| 1448272_at   | Btg2          | 2.33 | 3.16E-14 |
| 1436994_a_at | Hist1h1c      | 2.34 | 3.23E-14 |
| 1439925_at   | Tm4sf1        | 2.34 | 3.43E-14 |
| 1438073_at   | Spry3         | 2.35 | 3.80E-14 |
| 1448239_at   | Hmox1         | 2.33 | 3.92E-14 |
| 1449824_at   | Prg4          | 2.36 | 3.92E-14 |
| 1441481_at   | Mfap3l        | 2.32 | 4.17E-14 |
| 1416200_at   | Il33          | 2.31 | 4.62E-14 |
| 1424076_at   | Gdpd1         | 2.38 | 4.81E-14 |
| 1428433_at   | Hipk2         | 2.31 | 4.83E-14 |
| 1438431_at   | Abcd2         | 2.38 | 5.13E-14 |
| 1419674_a_at | Dpep1         | 2.33 | 5.16E-14 |
| 1439787_at   | P2rx7         | 2.32 | 5.56E-14 |
| 1420664_s_at | Procr         | 2.31 | 5.73E-14 |
| 1428909_at   | A130040M12Rik | 2.31 | 6.63E-14 |
| 1431613_a_at | Kcnk10        | 2.34 | 7.01E-14 |
| 1449399_a_at | Il1b          | 2.42 | 7.40E-14 |
| 1416069_at   | Pfkip         | 2.33 | 7.54E-14 |
| 1427844_a_at | Cebpb         | 2.29 | 7.58E-14 |
| 1450779_at   | Fabp7         | 2.89 | 7.77E-14 |
| 1434479_at   | Col5a1        | 2.31 | 9.00E-14 |
| 1448509_at   | Fam107b       | 2.30 | 9.24E-14 |
| 1418760_at   | Rdh11         | 2.36 | 1.20E-13 |
| 1421267_a_at | Cited2        | 2.40 | 1.24E-13 |
| 1421141_a_at | Foxp1         | 2.38 | 1.39E-13 |
| 1434302_at   | NA            | 2.27 | 1.49E-13 |
| 1460085_at   | Zfp281        | 2.34 | 1.55E-13 |
| 1424932_at   | Egfr          | 2.38 | 1.65E-13 |
| 1417023_a_at | Fabp4         | 2.38 | 1.66E-13 |
| 1450884_at   | Cd36          | 2.45 | 1.73E-13 |
| 1449209_a_at | Rdh11         | 2.34 | 1.74E-13 |
| 1429897_a_at | D16Ertd472e   | 2.40 | 1.85E-13 |
| 1424938_at   | Steap1        | 2.30 | 1.98E-13 |
| 1444512_at   | Arhgap29      | 2.32 | 2.28E-13 |



|              |               |      |          |
|--------------|---------------|------|----------|
| 1424268_at   | Smox          | 2.25 | 2.48E-13 |
| 1433944_at   | Hectd2        | 2.32 | 2.53E-13 |
| 1451371_at   | Mrap          | 2.35 | 3.10E-13 |
| 1422571_at   | Thbs2         | 2.24 | 3.86E-13 |
| 1442116_at   | Gpr176        | 2.23 | 3.89E-13 |
| 1431680_a_at | Ptprk         | 2.26 | 4.77E-13 |
| 1420690_at   | Fgf10         | 2.28 | 5.38E-13 |
| 1426641_at   | Trib2         | 2.21 | 5.43E-13 |
| 1437133_x_at | Akr1b3        | 2.25 | 5.55E-13 |
| 1456874_at   | Flrt2         | 2.23 | 5.59E-13 |
| 1430307_a_at | Me1           | 2.26 | 6.05E-13 |
| 1417273_at   | Pdk4          | 2.22 | 6.26E-13 |
| 1417065_at   | Egr1          | 2.26 | 7.38E-13 |
| 1425525_a_at | P2rx4         | 2.22 | 7.85E-13 |
| 1426599_a_at | Slc2a1        | 2.21 | 9.18E-13 |
| 1420654_a_at | Gbe1          | 2.21 | 9.50E-13 |
| 1451532_s_at | Steap1        | 2.21 | 1.07E-12 |
| 1425895_a_at | Id1           | 2.23 | 1.15E-12 |
| 1416741_at   | Col5a1        | 2.21 | 1.46E-12 |
| 1450214_at   | Adora2b       | 2.18 | 1.79E-12 |
| 1449984_at   | Cxcl2         | 2.71 | 1.81E-12 |
| 1423176_at   | Tob1          | 2.18 | 1.85E-12 |
| 1449965_at   | Mcpt8         | 2.22 | 1.96E-12 |
| 1423284_at   | Mansc1        | 2.41 | 2.12E-12 |
| 1424588_at   | Srgap3        | 2.26 | 2.12E-12 |
| 1456073_s_at | Panx3         | 2.37 | 2.19E-12 |
| 1419149_at   | Serpine1      | 2.26 | 2.36E-12 |
| 1419309_at   | Pdpm          | 2.17 | 2.40E-12 |
| 1420502_at   | Sat1          | 2.17 | 2.50E-12 |
| 1419317_x_at | Lce3c         | 2.18 | 2.52E-12 |
| 1421217_a_at | Lgals9        | 2.17 | 2.66E-12 |
| 1417194_at   | Sod2          | 2.20 | 2.75E-12 |
| 1421142_s_at | Foxp1         | 2.22 | 2.75E-12 |
| 1437784_at   | Runx1t1       | 2.24 | 2.87E-12 |
| 1427391_a_at | Col12a1       | 2.20 | 3.00E-12 |
| 1452067_at   | Naaa          | 2.20 | 3.37E-12 |
| 1441277_s_at | Ptprk         | 2.19 | 3.41E-12 |
| 1448325_at   | Ppp1r15a      | 2.23 | 3.72E-12 |
| 1455324_at   | Plcx2         | 2.17 | 3.78E-12 |
| 1422317_a_at | Il1rl1        | 2.14 | 3.89E-12 |
| 1436405_at   | Dock4         | 2.15 | 5.41E-12 |
| 1453607_at   | Mfap3l        | 2.14 | 5.49E-12 |
| 1425035_s_at | Dnmt3l        | 2.13 | 6.72E-12 |
| 1416892_s_at | Fam107b       | 2.14 | 7.11E-12 |
| 1421844_at   | Il1rap        | 2.12 | 8.07E-12 |
| 1452145_at   | H6pd          | 2.14 | 8.20E-12 |
| 1415874_at   | Spry1         | 2.23 | 8.34E-12 |
| 1453839_a_at | Pi16          | 2.29 | 8.34E-12 |
| 1457404_at   | Nfkbiz        | 2.13 | 9.07E-12 |
| 1453344_at   | 1810032O08Rik | 2.13 | 9.71E-12 |
| 1421291_at   | Il18rap       | 2.13 | 1.05E-11 |
| 1456893_at   | NA            | 2.14 | 1.10E-11 |
| 1430520_at   | Cpne8         | 2.10 | 1.28E-11 |
| 1427481_a_at | Atp1a3        | 2.13 | 1.31E-11 |
| 1430057_s_at | Lrrc57        | 2.14 | 1.53E-11 |

|              |               |      |          |
|--------------|---------------|------|----------|
| 1416953_at   | Ctgf          | 2.27 | 1.55E-11 |
| 1438603_x_at | Masp1         | 2.12 | 1.75E-11 |
| 1434028_at   | Arnt2         | 2.09 | 1.75E-11 |
| 1418936_at   | Maff          | 2.19 | 1.80E-11 |
| 1426377_at   | Zfp281        | 2.11 | 1.85E-11 |
| 1456524_at   | Nrg1          | 2.10 | 2.02E-11 |
| 1420450_at   | Mmp10         | 2.17 | 2.02E-11 |
| 1427364_a_at | Odc1          | 2.09 | 2.23E-11 |
| 1421551_s_at | Ifi202b       | 2.08 | 2.37E-11 |
| 1449871_at   | Tbx18         | 2.10 | 2.75E-11 |
| 1416632_at   | Me1           | 2.10 | 3.18E-11 |
| 1449909_at   | 2010005H15Rik | 2.19 | 3.31E-11 |
| 1424350_s_at | Lpgat1        | 2.09 | 4.07E-11 |
| 1451950_a_at | Cd80          | 2.10 | 4.08E-11 |
| 1425113_x_at | NA            | 2.06 | 5.44E-11 |
| 1428776_at   | Slc10a6       | 2.11 | 5.51E-11 |
| 1455646_at   | 2010004M13Rik | 2.09 | 5.68E-11 |
| 1426806_at   | Obfc2a        | 2.09 | 6.10E-11 |
| 1440169_x_at | Ifnar2        | 2.10 | 6.12E-11 |
| 1421001_a_at | Car6          | 2.07 | 6.33E-11 |
| 1420973_at   | Arid5b        | 2.08 | 6.92E-11 |
| 1427313_at   | Ptgir         | 2.06 | 7.46E-11 |
| 1425511_at   | Mark1         | 2.06 | 7.94E-11 |
| 1452646_at   | Trp53inp2     | 2.04 | 8.82E-11 |
| 1417937_at   | Dact1         | 2.09 | 8.96E-11 |
| 1456545_at   | Il18rap       | 2.06 | 9.12E-11 |
| 1420577_at   | Aicda         | 2.07 | 9.20E-11 |
| 1416868_at   | Cdkn2c        | 2.04 | 9.62E-11 |
| 1452203_at   | Obfc2a        | 2.07 | 9.75E-11 |
| 1428527_at   | Snx7          | 2.05 | 1.03E-10 |
| 1416381_a_at | Prdx5         | 2.05 | 1.05E-10 |
| 1434430_s_at | Adora2b       | 2.12 | 1.05E-10 |
| 1417329_at   | Slc23a2       | 2.03 | 1.06E-10 |
| 1425130_a_at | Ptpn5         | 2.06 | 1.15E-10 |
| 1435222_at   | Foxp1         | 2.06 | 1.27E-10 |
| 1428636_at   | Steap2        | 2.03 | 1.40E-10 |
| 1449265_at   | Casp1         | 2.04 | 1.40E-10 |
| 1426600_at   | Slc2a1        | 2.01 | 1.45E-10 |
| 1434034_at   | Cerk          | 2.03 | 1.50E-10 |
| 1421843_at   | Il1rap        | 2.02 | 1.64E-10 |
| 1419703_at   | Col5a3        | 2.16 | 1.67E-10 |
| 1422822_at   | Stard5        | 2.03 | 1.69E-10 |
| 1424187_at   | Ccdc80        | 2.02 | 1.70E-10 |
| 1456133_x_at | Itgb5         | 2.02 | 1.70E-10 |
| 1434993_at   | Fam5c         | 2.07 | 1.75E-10 |
| 1428919_at   | Fgfr1op       | 2.03 | 2.02E-10 |
| 1428804_at   | Mfap3l        | 2.02 | 2.12E-10 |
| 1426587_a_at | Stat3         | 2.00 | 2.33E-10 |
| 1424077_at   | Gdpd1         | 2.04 | 2.84E-10 |
| 1435596_at   | Pion          | 2.02 | 3.16E-10 |
| 1459749_s_at | Fat4          | 2.04 | 3.16E-10 |
| 1451446_at   | Antxr1        | 2.07 | 3.18E-10 |
| 1452068_at   | Naaa          | 2.02 | 3.61E-10 |
| 1419498_at   | Tmigd1        | 2.07 | 3.69E-10 |
| 1427347_s_at | Tubb2a        | 1.98 | 4.00E-10 |

|              |               |      |          |
|--------------|---------------|------|----------|
| 1438824_at   | Slc20a1       | 1.99 | 4.01E-10 |
| 1440344_at   | Snord89       | 2.00 | 4.08E-10 |
| 1430623_s_at | Obfc2a        | 2.01 | 4.23E-10 |
| 1456200_at   | Ipmk          | 2.01 | 4.31E-10 |
| 1428670_at   | 2610305J24Rik | 2.06 | 4.43E-10 |
| 1435640_x_at | A130040M12Rik | 2.11 | 4.65E-10 |
| 1451344_at   | Tmem119       | 1.97 | 5.61E-10 |
| 1434773_a_at | Slc2a1        | 1.98 | 5.69E-10 |
| 1448785_at   | Runx1t1       | 1.99 | 5.94E-10 |
| 1460227_at   | Timp1         | 1.97 | 6.18E-10 |
| 1430997_at   | Cd47          | 2.07 | 6.20E-10 |
| 1436545_at   | Dtx4          | 2.01 | 6.38E-10 |
| 1430612_at   | 1810033B17Rik | 2.07 | 6.62E-10 |
| 1455242_at   | Foxp1         | 1.98 | 7.78E-10 |
| 1427985_at   | Spin4         | 1.98 | 7.91E-10 |
| 1448069_at   | Tm4sf1        | 2.01 | 8.90E-10 |
| 1452016_at   | Alox5ap       | 1.98 | 9.22E-10 |
| 1431146_a_at | Cpne8         | 1.97 | 9.52E-10 |
| 1427334_s_at | 2810474O19Rik | 1.97 | 1.03E-09 |
| 1421140_a_at | Foxp1         | 1.95 | 1.05E-09 |
| 1448306_at   | Nfkbia        | 1.95 | 1.16E-09 |
| 1418401_a_at | Dusp16        | 1.98 | 1.19E-09 |
| 1459898_at   | Sbsn          | 1.96 | 1.24E-09 |
| 1455750_at   | Ralgapa2      | 1.94 | 1.25E-09 |
| 1424025_at   | BC013529      | 1.97 | 1.46E-09 |
| 1426223_at   | Ttc39c        | 2.03 | 1.62E-09 |
| 1451647_at   | Slc24a1       | 1.94 | 1.63E-09 |
| 1418453_a_at | Atp1b1        | 1.93 | 1.73E-09 |
| 1416934_at   | Mtm1          | 2.00 | 1.83E-09 |
| 1437318_at   | Pak3          | 1.96 | 1.83E-09 |
| 1456130_at   | Thsd7a        | 1.95 | 1.89E-09 |
| 1436220_at   | Zfp287        | 1.93 | 1.91E-09 |
| 1442947_x_at | NA            | 1.98 | 2.00E-09 |
| 1422474_at   | Pde4b         | 1.95 | 2.17E-09 |
| 1434903_s_at | Il1rl2        | 1.95 | 2.30E-09 |
| 1452716_at   | 5730469M10Rik | 1.94 | 2.30E-09 |
| 1454646_at   | Tcp11l2       | 1.94 | 2.35E-09 |
| 1434303_at   | Raph1         | 1.92 | 2.36E-09 |
| 1435872_at   | NA            | 2.07 | 2.76E-09 |
| 1450971_at   | Gadd45b       | 1.93 | 2.79E-09 |
| 1442988_at   | NA            | 1.93 | 2.89E-09 |
| 1423100_at   | Fos           | 1.93 | 2.89E-09 |
| 1434298_at   | Zeb2          | 1.93 | 3.12E-09 |
| 1456319_at   | NA            | 1.97 | 3.30E-09 |
| 1416740_at   | Col5a1        | 1.92 | 3.43E-09 |
| 1435327_at   | Lpgat1        | 1.93 | 3.44E-09 |
| 1422473_at   | Pde4b         | 1.94 | 3.62E-09 |
| 1436215_at   | Ipmk          | 1.91 | 3.69E-09 |
| 1436614_at   | NA            | 1.97 | 3.74E-09 |
| 1428492_at   | Glipr2        | 1.94 | 3.80E-09 |
| 1450448_at   | Stc1          | 1.91 | 4.15E-09 |
| 1451466_at   | D16Ertd472e   | 1.96 | 4.15E-09 |
| 1426454_at   | Arhgdib       | 1.91 | 4.38E-09 |
| 1425145_at   | Il1rl1        | 1.90 | 4.46E-09 |
| 1435888_at   | Egfr          | 1.91 | 4.93E-09 |

|                    |               |      |          |
|--------------------|---------------|------|----------|
| 1434111_at         | Lphn2         | 1.92 | 5.00E-09 |
| 1428861_at         | Filip1l       | 1.92 | 5.25E-09 |
| 1446324_at         | NA            | 1.92 | 5.83E-09 |
| 1436085_at         | Zbtb34        | 1.92 | 6.28E-09 |
| 1426405_at         | Rnf11         | 1.89 | 6.42E-09 |
| 1456022_at         | Hipk2         | 1.89 | 6.59E-09 |
| 1456389_at         | Zeb2          | 1.90 | 7.46E-09 |
| 1424863_a_at       | Hipk2         | 1.88 | 7.47E-09 |
| 1423890_x_at       | Atp1b1        | 1.90 | 7.51E-09 |
| 1449976_a_at       | Gpr35         | 1.89 | 7.75E-09 |
| 1426619_at         | Aim2          | 1.91 | 8.18E-09 |
| 1451828_a_at       | Acsl4         | 1.89 | 8.25E-09 |
| 1421225_a_at       | Slc4a4        | 1.89 | 8.27E-09 |
| 1455544_at         | Zranb3        | 1.92 | 8.56E-09 |
| 1452045_at         | Zfp281        | 1.89 | 8.71E-09 |
| 1450663_at         | Thbs2         | 1.89 | 8.89E-09 |
| 1420715_a_at       | Pparg         | 1.92 | 9.38E-09 |
| 1417566_at         | Abhd5         | 1.87 | 9.59E-09 |
| 1447774_x_at       | 5730469M10Rik | 1.88 | 9.85E-09 |
| 1441380_at         | Ttc39c        | 1.94 | 1.02E-08 |
| 1417423_at         | Grina         | 1.89 | 1.07E-08 |
| 1450744_at         | Eil2          | 1.88 | 1.12E-08 |
| 1426979_at         | Mlxip         | 1.87 | 1.16E-08 |
| 1436297_a_at       | Grina         | 1.92 | 1.20E-08 |
| 1450645_at         | Mt4           | 1.88 | 1.23E-08 |
| 1417191_at         | Dnajb9        | 1.87 | 1.28E-08 |
| 1421326_at         | Csf2rb        | 1.96 | 1.30E-08 |
| 1434130_at         | Lhfp12        | 1.86 | 1.32E-08 |
| 1454617_at         | Arrdc3        | 1.87 | 1.39E-08 |
| AFFX-r2-Bs-dap-M_a | NA            | 1.90 | 1.41E-08 |
| 1426575_at         | Sgms1         | 1.85 | 1.49E-08 |
| 1455711_at         | Dtx4          | 1.87 | 1.50E-08 |
| 1438157_s_at       | Nfkbia        | 1.86 | 1.58E-08 |
| 1427381_at         | Irg1          | 2.06 | 1.59E-08 |
| 1423223_a_at       | Prdx6         | 1.86 | 1.67E-08 |
| 1436544_at         | Atp10d        | 1.86 | 1.77E-08 |
| 1421299_a_at       | Lef1          | 1.85 | 1.93E-08 |
| 1428568_at         | B230217C12Rik | 1.86 | 2.00E-08 |
| 1449731_s_at       | Nfkbia        | 1.86 | 2.02E-08 |
| 1423259_at         | Id4           | 2.02 | 2.14E-08 |
| 1418237_s_at       | Col18a1       | 1.92 | 2.18E-08 |
| 1429974_at         | Tbx18         | 1.86 | 2.22E-08 |
| 1444088_at         | NA            | 1.85 | 2.29E-08 |
| 1422179_at         | Gjb4          | 1.87 | 2.30E-08 |
| 1447918_x_at       | Iglv1         | 1.89 | 2.37E-08 |
| 1455393_at         | Cp            | 1.84 | 2.47E-08 |
| 1444254_at         | Tns4          | 1.84 | 2.48E-08 |
| 1420558_at         | Selp          | 1.84 | 2.53E-08 |
| 1457045_at         | Galnt13       | 1.84 | 2.54E-08 |
| 1418925_at         | Celsr1        | 1.89 | 2.56E-08 |
| 1432511_s_at       | Haus2         | 1.85 | 2.95E-08 |
| 1437329_at         | Ptplb         | 1.90 | 2.99E-08 |
| 1435047_at         | Rab3c         | 1.84 | 3.01E-08 |
| 1416432_at         | Pfkfb3        | 1.83 | 3.18E-08 |
| 1431936_a_at       | Neu2          | 1.91 | 3.30E-08 |

|              |               |      |          |
|--------------|---------------|------|----------|
| 1427683_at   | Egr2          | 1.85 | 3.41E-08 |
| 1450719_at   | Mep1a         | 1.84 | 3.48E-08 |
| 1422403_at   | NA            | 1.84 | 3.48E-08 |
| 1435943_at   | Dpep1         | 1.84 | 3.70E-08 |
| 1434982_at   | Rnf182        | 1.88 | 3.95E-08 |
| 1417813_at   | Ikbke         | 1.83 | 4.01E-08 |
| 1448182_a_at | Cd24a         | 1.84 | 4.19E-08 |
| 1449450_at   | Ptges         | 1.83 | 4.20E-08 |
| 1436499_at   | Sgms1         | 1.83 | 4.65E-08 |
| 1418368_at   | Retnlb        | 1.84 | 4.75E-08 |
| 1430466_at   | 2310005G13Rik | 1.91 | 4.86E-08 |
| 1455400_at   | Ddah1         | 1.82 | 4.94E-08 |
| 1417534_at   | Itgb5         | 1.82 | 5.00E-08 |
| 1433441_at   | Fbxl5         | 1.86 | 5.21E-08 |
| 1449328_at   | Ly75          | 1.83 | 5.42E-08 |
| 1456223_at   | NA            | 1.89 | 5.96E-08 |
| 1419321_at   | F7            | 1.84 | 5.99E-08 |
| 1417777_at   | Ptgr1         | 1.81 | 6.03E-08 |
| 1415899_at   | Junb          | 1.81 | 6.25E-08 |
| 1417602_at   | Per2          | 1.84 | 6.53E-08 |
| 1422263_at   | Bdkrb2        | 1.80 | 6.61E-08 |
| 1439347_at   | Tns4          | 1.80 | 6.69E-08 |
| 1422208_a_at | Gnb5          | 1.82 | 6.72E-08 |
| 1430031_at   | Ipmk          | 1.81 | 7.49E-08 |
| 1448005_at   | Sash1         | 1.82 | 7.64E-08 |
| 1422631_at   | Ahr           | 1.82 | 7.78E-08 |
| 1419455_at   | Il10rb        | 1.81 | 7.92E-08 |
| 1430577_at   | Haus2         | 1.82 | 7.94E-08 |
| 1422821_s_at | Stard5        | 1.80 | 8.21E-08 |
| 1415677_at   | Dhrs1         | 1.82 | 8.24E-08 |
| 1437110_at   | 2810474O19Rik | 1.80 | 8.38E-08 |
| 1448211_at   | Atp6v0e2      | 1.83 | 8.64E-08 |
| 1420472_at   | Mtpn          | 1.80 | 9.36E-08 |
| 1452398_at   | Plce1         | 1.85 | 9.74E-08 |
| 1450766_at   | Pde6h         | 1.79 | 9.97E-08 |
| 1417045_at   | Bid           | 1.80 | 1.05E-07 |
| 1419182_at   | Svep1         | 1.80 | 1.05E-07 |
| 1452858_at   | Elavl1        | 1.79 | 1.10E-07 |
| 1419758_at   | Abcb1a        | 1.81 | 1.11E-07 |
| 1434774_at   | Rhbdf2        | 1.80 | 1.12E-07 |
| 1426955_at   | Col18a1       | 1.84 | 1.18E-07 |
| 1420088_at   | Nfkbia        | 1.79 | 1.24E-07 |
| 1449453_at   | Bst1          | 1.96 | 1.26E-07 |
| 1434291_a_at | Serf1         | 1.83 | 1.34E-07 |
| 1417923_at   | Pak3          | 1.79 | 1.37E-07 |
| 1419132_at   | Tlr2          | 1.78 | 1.43E-07 |
| 1452058_a_at | Rnf11         | 1.80 | 1.46E-07 |
| 1427164_at   | Il13ra1       | 1.79 | 1.49E-07 |
| 1449555_a_at | Fetub         | 1.78 | 1.50E-07 |
| 1421172_at   | Adam12        | 1.80 | 1.63E-07 |
| 1420553_x_at | Serpina1a     | 1.78 | 1.68E-07 |
| 1460367_at   | Hbp1          | 1.78 | 1.69E-07 |
| 1450044_at   | Fzd7          | 1.78 | 1.76E-07 |
| 1424679_at   | Mab21l1       | 1.82 | 1.80E-07 |
| 1454995_at   | Ddah1         | 1.77 | 1.88E-07 |

|              |               |      |          |
|--------------|---------------|------|----------|
| 1460314_s_at | NA            | 1.77 | 1.91E-07 |
| 1457316_at   | Mtap6         | 1.79 | 2.01E-07 |
| 1423352_at   | Crispld1      | 1.78 | 2.06E-07 |
| 1430252_at   | 3110027N22Rik | 1.82 | 2.14E-07 |
| 1450652_at   | Ctsk          | 1.77 | 2.15E-07 |
| 1420475_at   | Mtpn          | 1.76 | 2.15E-07 |
| 1427640_a_at | Runx1t1       | 1.82 | 2.16E-07 |
| 1425510_at   | Mark1         | 1.78 | 2.17E-07 |
| 1416313_at   | Mllt11        | 1.77 | 2.24E-07 |
| 1452783_at   | Fndc3b        | 1.77 | 2.25E-07 |
| 1435280_at   | Pde4d         | 1.78 | 2.29E-07 |
| 1440999_at   | Zfp697        | 1.78 | 2.30E-07 |
| 1421977_at   | Mmp19         | 1.78 | 2.35E-07 |
| 1420991_at   | Ankrd1        | 1.80 | 2.38E-07 |
| 1435735_x_at | H47           | 1.78 | 2.49E-07 |
| 1444242_at   | Slco2a1       | 1.77 | 2.57E-07 |
| 1453745_at   | 2700038G22Rik | 1.76 | 2.58E-07 |
| 1448704_s_at | H47           | 1.76 | 2.58E-07 |
| 1455204_at   | Pitpnc1       | 1.78 | 2.58E-07 |
| 1449773_s_at | Gadd45b       | 1.77 | 2.68E-07 |
| 1434129_s_at | Lhfp12        | 1.77 | 2.69E-07 |
| 1458718_at   | NA            | 1.76 | 2.70E-07 |
| 1435247_at   | Uba5          | 1.77 | 2.90E-07 |
| 1447862_x_at | Thbs2         | 1.76 | 2.92E-07 |
| 1434144_s_at | Wdyhv1        | 1.75 | 3.22E-07 |
| 1435084_at   | C730049O14Rik | 1.76 | 3.30E-07 |
| 1426246_at   | Pros1         | 1.75 | 3.34E-07 |
| 1454112_a_at | Haus2         | 1.76 | 3.35E-07 |
| 1440006_at   | BC026600      | 1.76 | 3.40E-07 |
| 1451775_s_at | Il13ra1       | 1.75 | 3.62E-07 |
| 1451793_at   | Klhl24        | 1.78 | 3.63E-07 |
| 1430634_a_at | Pfcp          | 1.75 | 3.75E-07 |
| 1453223_s_at | Dppa2         | 1.78 | 3.76E-07 |
| 1425837_a_at | Ccrn4l        | 1.75 | 3.83E-07 |
| 1437190_at   | Styk1         | 1.76 | 4.05E-07 |
| 1455740_at   | Hnrnpa1       | 1.80 | 4.31E-07 |
| 1448982_at   | Klk6          | 1.75 | 4.31E-07 |
| 1443993_at   | Zc3h12a       | 1.77 | 4.43E-07 |
| 1454966_at   | Itga8         | 1.79 | 4.45E-07 |
| 1434431_x_at | Adora2b       | 1.81 | 4.50E-07 |
| 1460463_at   | H60c          | 1.78 | 4.61E-07 |
| 1417750_a_at | Slc25a37      | 1.74 | 4.64E-07 |
| 1422620_s_at | Ppap2a        | 1.74 | 4.65E-07 |
| 1422677_at   | Dgat2         | 1.75 | 4.67E-07 |
| 1460700_at   | Stat3         | 1.75 | 4.68E-07 |
| 1455656_at   | Btla          | 1.76 | 4.83E-07 |
| 1446071_at   | Steap2        | 1.74 | 4.96E-07 |
| 1420992_at   | Ankrd1        | 1.76 | 5.09E-07 |
| 1457755_at   | Gng8          | 1.74 | 5.16E-07 |
| 1455936_a_at | Rbpms         | 1.74 | 5.24E-07 |
| 1417565_at   | Abhd5         | 1.73 | 5.26E-07 |
| 1418930_at   | Cxcl10        | 1.74 | 5.28E-07 |
| 1438773_at   | Steap2        | 1.74 | 5.31E-07 |
| 1441150_x_at | Samsn1        | 1.74 | 5.34E-07 |
| 1428653_x_at | Elavl1        | 1.74 | 5.49E-07 |

|              |               |      |          |
|--------------|---------------|------|----------|
| 1450826_a_at | Saa3          | 1.74 | 5.57E-07 |
| 1416268_at   | Ets2          | 1.76 | 5.57E-07 |
| 1419530_at   | Il12b         | 1.78 | 6.03E-07 |
| 1456039_at   | Snx14         | 1.73 | 6.05E-07 |
| 1436337_at   | 4930420K17Rik | 1.74 | 6.14E-07 |
| 1424126_at   | Alas1         | 1.73 | 6.93E-07 |
| 1424026_s_at | BC013529      | 1.74 | 6.99E-07 |
| 1453674_at   | Gcnt2         | 1.76 | 7.21E-07 |
| 1451462_a_at | Ifnar2        | 1.73 | 7.50E-07 |
| 1443475_at   | NA            | 1.73 | 7.67E-07 |
| 1444359_at   | NA            | 1.73 | 7.79E-07 |
| 1428920_at   | Hmg20a        | 1.77 | 7.88E-07 |
| 1428027_at   | NA            | 1.72 | 8.13E-07 |
| 1443789_x_at | Cox8c         | 1.75 | 8.28E-07 |
| 1439032_at   | Haus2         | 1.72 | 8.75E-07 |
| 1418480_at   | Ppbp          | 1.72 | 8.76E-07 |
| 1418345_at   | NA            | 1.72 | 9.09E-07 |
| 1420741_x_at | Lce1i         | 1.75 | 9.17E-07 |
| 1440086_at   | Rnf182        | 1.72 | 9.22E-07 |
| 1420420_at   | Hao1          | 1.73 | 9.39E-07 |
| 1427257_at   | Vcan          | 1.75 | 9.45E-07 |
| 1421031_a_at | 2310016C08Rik | 1.74 | 9.52E-07 |
| 1437856_at   | lpmk          | 1.72 | 9.57E-07 |
| 1423947_at   | 1110008P14Rik | 1.72 | 9.78E-07 |
| 1460243_at   | Sptlc2        | 1.71 | 9.85E-07 |
| 1450387_s_at | Ak4           | 1.72 | 1.05E-06 |
| 1424030_at   | Grhl1         | 1.76 | 1.07E-06 |
| 1438519_at   | Klhl24        | 1.73 | 1.10E-06 |
| 1460330_at   | Anxa3         | 1.73 | 1.11E-06 |
| 1444290_at   | Steap2        | 1.71 | 1.12E-06 |
| 1449221_a_at | Rrbp1         | 1.71 | 1.15E-06 |
| 1451263_a_at | Fabp4         | 1.74 | 1.16E-06 |
| 1429566_a_at | Hipk2         | 1.75 | 1.21E-06 |
| 1428306_at   | Ddit4         | 1.70 | 1.22E-06 |
| 1432489_a_at | Wdyhv1        | 1.72 | 1.33E-06 |
| 1428083_at   | Neat1         | 1.71 | 1.38E-06 |
| 1435449_at   | Bcl2l11       | 1.71 | 1.40E-06 |
| 1435326_at   | Lpgat1        | 1.71 | 1.47E-06 |
| 1442720_at   | NA            | 1.71 | 1.50E-06 |
| 1451382_at   | Chac1         | 1.73 | 1.57E-06 |
| 1426123_a_at | Rrbp1         | 1.70 | 1.57E-06 |
| 1452095_a_at | H47           | 1.70 | 1.58E-06 |
| 1443721_x_at | Sbno2         | 1.70 | 1.59E-06 |
| 1437113_s_at | Pld1          | 1.71 | 1.62E-06 |
| 1452071_at   | Slc4a4        | 1.70 | 1.63E-06 |
| 1439747_at   | Ptges         | 1.71 | 1.66E-06 |
| 1432276_at   | 4930519F16Rik | 1.71 | 1.68E-06 |
| 1429298_at   | Ddah1         | 1.70 | 1.71E-06 |
| 1427742_a_at | Klf6          | 1.70 | 1.71E-06 |
| 1421191_s_at | Gopc          | 1.70 | 1.73E-06 |
| 1437457_a_at | Mtpn          | 1.69 | 1.73E-06 |
| 1419331_at   | Cdh17         | 1.72 | 1.75E-06 |
| 1416383_a_at | Pcx           | 1.69 | 1.84E-06 |
| 1456888_at   | Pfkfb4        | 1.70 | 1.86E-06 |
| 1422818_at   | Nedd9         | 1.69 | 1.91E-06 |

|              |               |      |          |
|--------------|---------------|------|----------|
| 1450767_at   | Nedd9         | 1.70 | 1.94E-06 |
| 1427682_a_at | Egr2          | 1.69 | 2.14E-06 |
| 1434815_a_at | Mapkapk3      | 1.70 | 2.16E-06 |
| 1422619_at   | Ppap2a        | 1.68 | 2.20E-06 |
| 1427689_a_at | Tnip1         | 1.69 | 2.21E-06 |
| 1428312_at   | Lrrc57        | 1.69 | 2.27E-06 |
| 1427718_a_at | Mdm2          | 1.68 | 2.36E-06 |
| 1445669_at   | Spry4         | 1.70 | 2.39E-06 |
| 1440443_at   | E030016H06Rik | 1.71 | 2.52E-06 |
| 1423833_a_at | Brp44         | 1.68 | 2.53E-06 |
| 1421228_at   | Ccl7          | 1.68 | 2.54E-06 |
| 1449630_s_at | Mark1         | 1.68 | 2.62E-06 |
| 1448451_at   | Ak2           | 1.68 | 2.67E-06 |
| 1440192_at   | Ttc39b        | 1.69 | 2.68E-06 |
| 1439842_at   | Zfp287        | 1.69 | 2.73E-06 |
| 1423260_at   | Id4           | 1.76 | 2.74E-06 |
| 1417495_x_at | Cp            | 1.68 | 2.80E-06 |
| 1449007_at   | NA            | 1.68 | 2.94E-06 |
| 1417623_at   | Slc12a2       | 1.69 | 3.11E-06 |
| 1418641_at   | Lcp2          | 1.69 | 3.12E-06 |
| 1459813_at   | 1700012D01Rik | 1.71 | 3.15E-06 |
| 1424456_at   | Pvrl2         | 1.69 | 3.26E-06 |
| 1455114_at   | Ccno          | 1.69 | 3.33E-06 |
| 1449363_at   | Atf3          | 1.69 | 3.43E-06 |
| 1427884_at   | Col3a1        | 1.70 | 3.45E-06 |
| 1451030_at   | Akr1c21       | 1.69 | 3.47E-06 |
| 1418704_at   | S100a13       | 1.67 | 3.51E-06 |
| 1418448_at   | Rras          | 1.67 | 3.52E-06 |
| 1418295_s_at | Dgat1         | 1.67 | 3.56E-06 |
| 1419435_at   | Aox1          | 1.68 | 3.65E-06 |
| 1450829_at   | Tnfaip3       | 1.66 | 3.65E-06 |
| 1437953_at   | Gpcpd1        | 1.69 | 3.67E-06 |
| 1416933_at   | Por           | 1.66 | 3.76E-06 |
| 1456945_at   | Nudt6         | 1.70 | 3.89E-06 |
| 1416927_at   | Trp53inp1     | 1.67 | 3.95E-06 |
| 1432143_a_at | Hbp1          | 1.67 | 4.03E-06 |
| 1450322_s_at | NA            | 1.68 | 4.13E-06 |
| 1424287_at   | Prkx          | 1.67 | 4.18E-06 |
| 1423883_at   | Acsl1         | 1.67 | 4.29E-06 |
| 1429351_at   | Klhl24        | 1.67 | 4.33E-06 |
| 1447936_at   | 2410006H16Rik | 1.66 | 4.34E-06 |
| 1433833_at   | Fndc3b        | 1.66 | 4.49E-06 |
| 1424280_at   | Mospd1        | 1.69 | 4.54E-06 |
| 1449082_at   | Mfap5         | 1.66 | 4.73E-06 |
| 1458863_at   | 6330415G19Rik | 1.67 | 4.84E-06 |
| 1436764_at   | Pard3         | 1.66 | 4.93E-06 |
| 1425125_at   | Oit3          | 1.67 | 5.01E-06 |
| 1448568_a_at | Slc20a1       | 1.67 | 5.05E-06 |
| 1448477_at   | Chst12        | 1.65 | 5.10E-06 |
| 1433943_at   | NA            | 1.65 | 5.25E-06 |
| 1450295_s_at | Pvr           | 1.66 | 5.29E-06 |
| 1418162_at   | Tlr4          | 1.66 | 5.32E-06 |
| 1424457_at   | Apbb3         | 1.65 | 5.43E-06 |
| 1420646_at   | Nus1          | 1.66 | 5.43E-06 |
| 1428348_at   | Gzf1          | 1.67 | 5.51E-06 |



|              |               |      |          |
|--------------|---------------|------|----------|
| 1421369_a_at | Mab2111       | 1.67 | 5.60E-06 |
| 1416922_a_at | Bnip3l        | 1.65 | 5.72E-06 |
| 1422054_a_at | Skil          | 1.71 | 5.83E-06 |
| 1421694_a_at | Vcan          | 1.65 | 5.85E-06 |
| 1439098_at   | E230013L22Rik | 1.67 | 5.85E-06 |
| 1447448_s_at | Klf6          | 1.69 | 5.86E-06 |
| 1445413_at   | Bmpr1a        | 1.65 | 6.00E-06 |
| 1447885_x_at | Nedd9         | 1.66 | 6.13E-06 |
| 1422771_at   | Smad6         | 1.69 | 6.13E-06 |
| 1422526_at   | Acs1l         | 1.65 | 6.17E-06 |
| 1449815_a_at | Ssbp2         | 1.65 | 6.24E-06 |
| 1435510_at   | Ppm1h         | 1.66 | 6.24E-06 |
| 1431748_a_at | Rffl          | 1.65 | 6.57E-06 |
| 1434283_at   | Arid5b        | 1.64 | 6.58E-06 |
| 1449182_at   | Retn          | 1.65 | 6.65E-06 |
| 1453708_a_at | Gsto2         | 1.64 | 7.22E-06 |
| 1451747_a_at | Atg12         | 1.65 | 7.39E-06 |
| 1429007_at   | Slc35b2       | 1.64 | 7.43E-06 |
| 1456204_at   | 2010107H07Rik | 1.64 | 7.49E-06 |
| 1449449_at   | Ptges         | 1.64 | 7.53E-06 |
| 1437132_x_at | Nedd9         | 1.65 | 7.79E-06 |
| 1448558_a_at | Pla2g4a       | 1.65 | 7.87E-06 |
| 1447623_s_at | Prkd1         | 1.65 | 8.09E-06 |
| 1435584_at   | A630033H20Rik | 1.66 | 8.09E-06 |
| 1448919_at   | Cd302         | 1.64 | 8.19E-06 |
| 1455265_a_at | Rgs16         | 1.65 | 8.33E-06 |
| 1426576_at   | Sgms1         | 1.63 | 8.33E-06 |
| 1421830_at   | Ak4           | 1.64 | 8.50E-06 |
| 1450678_at   | Itgb2         | 1.64 | 8.90E-06 |
| 1425816_at   | Zfp287        | 1.65 | 9.03E-06 |
| 1419693_at   | Colec12       | 1.65 | 9.23E-06 |
| 1437247_at   | Fosl2         | 1.63 | 9.53E-06 |
| 1425364_a_at | Slc3a2        | 1.65 | 9.80E-06 |
| 1448110_at   | Sema4a        | 1.64 | 9.85E-06 |
| 1421792_s_at | Trem2         | 1.63 | 1.05E-05 |
| 1417318_at   | Dbc1          | 1.66 | 1.06E-05 |
| 1433986_at   | BC024659      | 1.63 | 1.08E-05 |
| 1433643_at   | Cacna2d1      | 1.62 | 1.14E-05 |
| 1434980_at   | Pik3r5        | 1.65 | 1.17E-05 |
| 1454901_at   | Ypel2         | 1.63 | 1.21E-05 |
| 1440204_at   | 3110039M20Rik | 1.63 | 1.23E-05 |
| 1417496_at   | Cp            | 1.63 | 1.24E-05 |
| 1437112_at   | Pld1          | 1.64 | 1.24E-05 |
| 1431050_at   | Rps6ka5       | 1.63 | 1.33E-05 |
| 1424352_at   | Cyp4a12a      | 1.62 | 1.41E-05 |
| 1443339_at   | Fam162a       | 1.65 | 1.41E-05 |
| 1433508_at   | Klf6          | 1.63 | 1.41E-05 |
| 1460574_at   | Fat4          | 1.62 | 1.47E-05 |
| 1429723_at   | 6330409N04Rik | 1.62 | 1.50E-05 |
| 1446503_at   | NA            | 1.63 | 1.51E-05 |
| 1426037_a_at | Rgs16         | 1.62 | 1.52E-05 |
| 1440260_at   | Ccdc58        | 1.62 | 1.54E-05 |
| 1459890_s_at | 1110008P14Rik | 1.62 | 1.55E-05 |
| 1434390_at   | AI503316      | 1.62 | 1.55E-05 |
| 1426404_a_at | Rnf11         | 1.61 | 1.56E-05 |

|              |          |      |          |
|--------------|----------|------|----------|
| 1434418_at   | Lass6    | 1.61 | 1.57E-05 |
| 1423739_x_at | Aplp2    | 1.61 | 1.60E-05 |
| 1434601_at   | Amigo2   | 1.64 | 1.62E-05 |
| 1453590_at   | Arl5b    | 1.63 | 1.66E-05 |
| 1423960_at   | Lpcat3   | 1.61 | 1.67E-05 |
| 1454734_at   | Lef1     | 1.62 | 1.67E-05 |
| 1417632_at   | Atp6v0a1 | 1.61 | 1.69E-05 |
| 1428393_at   | Nrn1     | 1.62 | 1.70E-05 |
| 1452521_a_at | Plaur    | 1.62 | 1.81E-05 |
| 1450110_at   | Adh7     | 1.62 | 1.81E-05 |
| 1437903_at   | Lox      | 1.62 | 1.81E-05 |
| 1449826_a_at | Fgf2     | 1.64 | 1.91E-05 |
| 1442753_at   | Tnfaip8  | 1.65 | 1.91E-05 |
| 1439066_at   | Angpt1   | 1.61 | 1.91E-05 |
| 1421889_a_at | Aplp2    | 1.61 | 1.93E-05 |
| 1422404_x_at | NA       | 1.61 | 1.97E-05 |
| 1437119_at   | Ern1     | 1.60 | 2.03E-05 |
| 1418267_at   | Mst1     | 1.61 | 2.04E-05 |
| 1424384_a_at | Znrf1    | 1.60 | 2.07E-05 |
| 1452233_at   | Abcc1    | 1.61 | 2.08E-05 |
| 1449994_at   | Epgn     | 1.61 | 2.08E-05 |
| 1424659_at   | Slit2    | 1.61 | 2.17E-05 |
| 1434831_a_at | Foxo3    | 1.62 | 2.20E-05 |
| 1424786_s_at | Wdr45    | 1.61 | 2.22E-05 |
| 1417392_a_at | Slc7a7   | 1.63 | 2.31E-05 |
| 1422580_at   | Myl4     | 1.65 | 2.44E-05 |
| 1427442_a_at | App      | 1.60 | 2.45E-05 |
| 1439616_at   | NA       | 1.61 | 2.48E-05 |
| 1451596_a_at | Sphk1    | 1.60 | 2.49E-05 |
| 1417220_at   | Fah      | 1.60 | 2.50E-05 |
| 1442878_at   | Prdx6    | 1.60 | 2.50E-05 |
| 1420621_a_at | App      | 1.60 | 2.53E-05 |
| 1451452_a_at | Rgs16    | 1.60 | 2.55E-05 |
| 1418350_at   | Hbegf    | 1.61 | 2.59E-05 |
| 1418966_a_at | Dcblid1  | 1.60 | 2.59E-05 |
| 1448546_at   | Rassf3   | 1.59 | 2.64E-05 |
| 1435458_at   | Pim1     | 1.63 | 2.69E-05 |
| 1455073_at   | Cdadc1   | 1.59 | 2.69E-05 |
| 1426074_at   | NA       | 1.60 | 2.70E-05 |
| 1419630_a_at | Trim11   | 1.60 | 2.80E-05 |
| 1451819_at   | Zswim6   | 1.60 | 2.87E-05 |
| 1421117_at   | Dst      | 1.62 | 2.89E-05 |
| 1425383_a_at | Pbx1     | 1.59 | 2.91E-05 |
| 1434885_at   | Spty2d1  | 1.60 | 2.91E-05 |
| 1439651_at   | NA       | 1.61 | 2.92E-05 |
| 1436202_at   | Malat1   | 1.60 | 2.92E-05 |
| 1455372_at   | Cpeb3    | 1.61 | 2.97E-05 |
| 1435628_x_at | NA       | 1.59 | 2.99E-05 |
| 1434378_a_at | Mxd4     | 1.63 | 3.01E-05 |
| 1444524_at   | Gm14005  | 1.62 | 3.06E-05 |
| 1439628_x_at | Rab38    | 1.60 | 3.11E-05 |
| 1460500_at   | Gm3715   | 1.60 | 3.19E-05 |
| 1446509_at   | Smox     | 1.59 | 3.20E-05 |
| 1449109_at   | Socs2    | 1.60 | 3.22E-05 |
| 1434379_at   | Mxd4     | 1.59 | 3.22E-05 |

|              |               |      |          |
|--------------|---------------|------|----------|
| 1429012_at   | Arhgef6       | 1.61 | 3.31E-05 |
| 1421947_at   | Gng12         | 1.58 | 3.32E-05 |
| 1448752_at   | Car2          | 1.60 | 3.32E-05 |
| 1417816_s_at | Serinc3       | 1.59 | 3.32E-05 |
| 1450928_at   | Id4           | 1.76 | 3.37E-05 |
| 1416700_at   | Rnd3          | 1.61 | 3.41E-05 |
| 1448469_at   | Nid1          | 1.58 | 3.43E-05 |
| 1448734_at   | Cp            | 1.59 | 3.47E-05 |
| 1449006_at   | Gla           | 1.62 | 3.50E-05 |
| 1448318_at   | Plin2         | 1.59 | 3.61E-05 |
| 1428471_at   | Sorbs1        | 1.63 | 3.61E-05 |
| 1421630_at   | NA            | 1.59 | 3.73E-05 |
| 1438346_at   | 4930525G20Rik | 1.58 | 3.74E-05 |
| 1450765_a_at | Pde6h         | 1.59 | 4.02E-05 |
| 1434754_at   | Rap1gap2      | 1.59 | 4.09E-05 |
| 1460036_at   | Ap1s2         | 1.60 | 4.15E-05 |
| 1423905_at   | Pvr           | 1.58 | 4.21E-05 |
| 1435174_at   | Rsb1          | 1.59 | 4.23E-05 |
| 1420710_at   | Rel           | 1.58 | 4.25E-05 |
| 1426315_a_at | 6330416G13Rik | 1.59 | 4.35E-05 |
| 1419012_at   | Zfpm2         | 1.62 | 4.37E-05 |
| 1459902_at   | 2700007P21Rik | 1.58 | 4.39E-05 |
| 1425975_a_at | Mapk8ip3      | 1.58 | 4.39E-05 |
| 1445522_at   | Atp8b4        | 1.58 | 4.39E-05 |
| 1439364_a_at | Mmp2          | 1.57 | 4.53E-05 |
| 1449682_s_at | NA            | 1.58 | 4.73E-05 |
| 1435221_at   | Foxp1         | 1.58 | 4.79E-05 |
| 1451653_a_at | Fam161a       | 1.57 | 4.81E-05 |
| 1423903_at   | Pvr           | 1.58 | 4.84E-05 |
| 1453392_at   | Ttc39b        | 1.58 | 4.84E-05 |
| 1452397_at   | 2810474O19Rik | 1.57 | 4.87E-05 |
| 1419704_at   | NA            | 1.58 | 4.88E-05 |
| 1451069_at   | Pim3          | 1.58 | 4.90E-05 |
| 1422053_at   | Inhba         | 1.64 | 4.91E-05 |
| 1435761_at   | NA            | 1.57 | 4.93E-05 |
| 1449891_a_at | Dcbl2         | 1.57 | 5.02E-05 |
| 1422673_at   | Prkd1         | 1.58 | 5.06E-05 |
| 1433740_at   | Tmem87b       | 1.57 | 5.07E-05 |
| 1442014_at   | NA            | 1.60 | 5.08E-05 |
| 1420474_at   | Mtpn          | 1.57 | 5.09E-05 |
| 1421384_at   | Lyst          | 1.57 | 5.13E-05 |
| 1418057_at   | Tiam1         | 1.58 | 5.26E-05 |
| 1441737_s_at | NA            | 1.57 | 5.28E-05 |
| 1435137_s_at | NA            | 1.57 | 5.39E-05 |
| 1418163_at   | Tlr4          | 1.57 | 5.41E-05 |
| 1442176_at   | Arid5b        | 1.57 | 5.44E-05 |
| 1453213_at   | Spata9        | 1.59 | 5.53E-05 |
| 1428288_at   | Klf9          | 1.57 | 5.56E-05 |
| 1456005_a_at | Bcl2l11       | 1.58 | 5.58E-05 |
| 1452161_at   | Tiparp        | 1.57 | 5.80E-05 |
| 1426316_at   | 6330416G13Rik | 1.59 | 6.02E-05 |
| 1421829_at   | Ak4           | 1.56 | 6.10E-05 |
| 1424697_at   | Dtwd1         | 1.56 | 6.25E-05 |
| 1455183_at   | Stk38l        | 1.56 | 6.38E-05 |
| 1448780_at   | Slc12a2       | 1.58 | 6.45E-05 |

|                     |         |      |             |
|---------------------|---------|------|-------------|
| 1421923_at          | Sh3bp5  | 1.57 | 6.48E-05    |
| 1442048_at          | Rnf11   | 1.56 | 6.63E-05    |
| 1447242_at          | NA      | 1.58 | 6.64E-05    |
| 1432344_a_at        | Aplp2   | 1.56 | 6.68E-05    |
| 1442359_at          | Steap2  | 1.56 | 7.12E-05    |
| 1416488_at          | Ccng2   | 1.56 | 7.12E-05    |
| 1418248_at          | Gla     | 1.56 | 7.27E-05    |
| 1432129_a_at        | Prrx1   | 1.56 | 7.38E-05    |
| 1416722_at          | Hmg20a  | 1.59 | 7.53E-05    |
| 1416743_at          | NA      | 1.56 | 7.53E-05    |
| 1416136_at          | Mmp2    | 1.55 | 7.73E-05    |
| 1448560_at          | Bid     | 1.56 | 7.78E-05    |
| 1420913_at          | Slco2a1 | 1.55 | 7.92E-05    |
| 1416701_at          | Rnd3    | 1.59 | 8.00E-05    |
| 1428736_at          | Gramd3  | 1.56 | 8.17E-05    |
| 1452826_s_at        | Fbxl20  | 1.55 | 8.34E-05    |
| 1420382_at          | Apobr   | 1.56 | 8.44E-05    |
| 1457179_at          | NA      | 1.58 | 8.47E-05    |
| 1426432_a_at        | Slc4a4  | 1.56 | 8.54E-05    |
| 1449931_at          | Cpeb4   | 1.57 | 8.56E-05    |
| 1455956_x_at        | Ccnd2   | 1.57 | 8.70E-05    |
| 1451152_a_at        | Atp1b1  | 1.55 | 8.70E-05    |
| 1449442_at          | Pex11a  | 1.55 | 8.80E-05    |
| 1440984_at          | Baz2b   | 1.55 | 8.81E-05    |
| 1451160_s_at        | Pvr     | 1.55 | 9.02E-05    |
| 1429299_at          | Ddah1   | 1.56 | 9.09E-05    |
| 1437224_at          | Rtn4    | 1.56 | 9.22E-05    |
| 1417730_at          | Ext1    | 1.56 | 9.27E-05    |
| 1447602_x_at        | Sulf2   | 1.56 | 9.38E-05    |
| 1437419_at          | Bmp2k   | 1.55 | 9.66E-05    |
| 1440867_at          | Spry4   | 1.56 | 9.82E-05    |
| 1417330_at          | Slc23a2 | 1.55 | 0.000100191 |
| 1425506_at          | Mylk    | 1.56 | 0.000101677 |
| 1427883_a_at        | Col3a1  | 1.56 | 0.000105108 |
| 1448793_a_at        | Sdc4    | 1.55 | 0.00010775  |
| 1450153_at          | Gopc    | 1.55 | 0.000109706 |
| 1417408_at          | F3      | 1.58 | 0.000110096 |
| 1437100_x_at        | Pim3    | 1.55 | 0.000110197 |
| 1459718_x_at        | Klf6    | 1.56 | 0.000110334 |
| 1424356_a_at        | Metrn1  | 1.54 | 0.00011057  |
| 1416067_at          | Ifrd1   | 1.54 | 0.000112427 |
| 1426383_at          | Cry2    | 1.55 | 0.000113369 |
| 1459908_at          | NA      | 1.55 | 0.000115456 |
| AFFX-r2-Bs-dap-3_at | NA      | 1.58 | 0.000117297 |
| 1416022_at          | Fabp5   | 1.54 | 0.000117595 |
| 1420089_at          | Nfkbia  | 1.56 | 0.000119585 |
| 1455130_at          | Spty2d1 | 1.55 | 0.000120868 |
| 1434537_at          | Slco3a1 | 1.54 | 0.000122177 |
| 1428694_at          | Mir17hg | 1.54 | 0.000122871 |
| 1455096_at          | Flrt2   | 1.54 | 0.000123581 |
| 1452360_a_at        | Kdm5a   | 1.55 | 0.000123839 |
| 1435264_at          | Emilin2 | 1.54 | 0.000123906 |
| 1429573_at          | Dmrtc1a | 1.56 | 0.00012404  |
| 1426973_at          | Gpr153  | 1.54 | 0.000127463 |
| 1454766_at          | Amn1    | 1.54 | 0.000129291 |

|              |               |       |             |
|--------------|---------------|-------|-------------|
| 1419613_at   | Col7a1        | 1.54  | 0.000131857 |
| 1423345_at   | Degs1         | 1.54  | 0.000137037 |
| 1418465_at   | Ncf4          | 1.54  | 0.00013772  |
| 1424772_at   | H2afj         | 1.53  | 0.000138282 |
| 1427198_at   | BC022960      | 1.58  | 0.000143988 |
| 1418144_a_at | Pip5k1a       | 1.53  | 0.000144559 |
| 1428896_at   | Pdgfrl        | 1.53  | 0.000144913 |
| 1444097_at   | Metrn1        | 1.54  | 0.000149889 |
| 1416950_at   | Tnfaip8       | 1.53  | 0.000155541 |
| 1416471_at   | Cept1         | 1.53  | 0.000157099 |
| 1440254_at   | Snord104      | 1.53  | 0.000157173 |
| 1460650_at   | Atp6v0a1      | 1.53  | 0.000161352 |
| 1429074_at   | 1700026D08Rik | 1.53  | 0.000162206 |
| 1429186_a_at | Cdadc1        | 1.53  | 0.000162592 |
| 1427470_s_at | Napb          | 1.54  | 0.000162971 |
| 1422847_a_at | Prkcd         | 1.53  | 0.000163465 |
| 1438441_at   | NA            | 1.60  | 0.000163813 |
| 1435228_at   | BC023829      | 1.53  | 0.000164099 |
| 1456341_a_at | Klf9          | 1.55  | 0.000167041 |
| 1438702_at   | Flrt2         | 1.53  | 0.000167041 |
| 1433678_at   | Pld4          | 1.53  | 0.000168388 |
| 1437284_at   | Fzd1          | 1.53  | 0.000169847 |
| 1418911_s_at | Acs14         | 1.53  | 0.00017119  |
| 1441907_s_at | Cd93          | 1.53  | 0.000174241 |
| 1455768_at   | Npc2          | 1.55  | 0.000175553 |
| 1460563_at   | Nus1          | 1.53  | 0.000177719 |
| 1440966_at   |               | 7-Mar | 0.000177719 |
| 1453120_at   | Tmx4          | 1.54  | 0.000177719 |
| 1445589_at   | NA            | 1.53  | 0.000177998 |
| 1440231_at   | Mtap9         | 1.53  | 0.000180291 |
| 1429169_at   | Rbm3          | 1.52  | 0.000181407 |
| 1450643_s_at | Acs11         | 1.53  | 0.000187404 |
| 1439965_at   | Slc43a2       | 1.53  | 0.000187609 |
| 1436763_a_at | Klf9          | 1.54  | 0.000189172 |
| 1423904_a_at | Pvr           | 1.53  | 0.00018928  |
| 1448508_at   | Traf3ip2      | 1.53  | 0.000194097 |
| 1426243_at   | Cth           | 1.63  | 0.000194297 |
| 1444531_at   | NA            | 1.53  | 0.000196308 |
| 1443619_at   | Tmem30a       | 1.52  | 0.00019652  |
| 1426992_at   | Xpr1          | 1.52  | 0.000197595 |
| 1453731_a_at | Dram2         | 1.53  | 0.000200713 |
| 1423871_at   | Tmem63a       | 1.52  | 0.000207377 |
| 1458963_at   | Ttc39b        | 1.52  | 0.000213064 |
| 1429726_at   | Slc16a9       | 1.52  | 0.000219885 |
| 1423605_a_at | Mdm2          | 1.51  | 0.000226669 |
| 1459597_at   | Mtpn          | 1.52  | 0.000231446 |
| 1450173_at   | Ripk2         | 1.52  | 0.000231512 |
| 1422507_at   | Cstb          | 1.51  | 0.000231757 |
| 1442005_at   | AW987390      | 1.52  | 0.000233119 |
| 1429826_at   | Prl7b1        | 1.53  | 0.000240214 |
| 1416360_at   | Snx18         | 1.53  | 0.000241352 |
| 1449454_at   | Bst1          | 1.53  | 0.000247082 |
| 1424942_a_at | Myc           | 1.53  | 0.000248937 |
| 1451973_at   | Uba5          | 1.51  | 0.000248937 |
| 1418840_at   | Pdcd4         | 1.51  | 0.000249151 |

|              |               |      |             |
|--------------|---------------|------|-------------|
| 1456000_at   | Ddx18         | 1.52 | 0.000249708 |
| 1455737_at   | Ppm1h         | 1.51 | 0.000250301 |
| 1420388_at   | Prss12        | 1.52 | 0.000252205 |
| 1447014_at   | NA            | 1.51 | 0.000252608 |
| 1452290_at   | Tmem106b      | 1.51 | 0.000255824 |
| 1421058_at   | Adh7          | 1.54 | 0.000255936 |
| 1434387_at   | Itfg3         | 1.53 | 0.00025634  |
| 1434260_at   | Fchsd2        | 1.52 | 0.000257164 |
| 1449641_at   | Adk           | 1.51 | 0.000257851 |
| 1428749_at   | Dmxl2         | 1.52 | 0.000258157 |
| 1449840_at   | Sntb2         | 1.51 | 0.000266332 |
| 1423170_at   | Taf7          | 1.53 | 0.000267444 |
| 1438407_at   | Dsel          | 1.52 | 0.000269404 |
| 1456897_at   | NA            | 1.51 | 0.000269984 |
| 1449291_a_at | Dcbld1        | 1.52 | 0.000272405 |
| 1423465_at   | Frrs1         | 1.51 | 0.000274699 |
| 1448855_at   | Rassf1        | 1.51 | 0.00027781  |
| 1425739_at   | Pld1          | 1.51 | 0.000280266 |
| 1416808_at   | Nid1          | 1.50 | 0.000282394 |
| 1435335_a_at | Gnptab        | 1.52 | 0.000284967 |
| 1429890_at   | A930007D18Rik | 1.51 | 0.000285589 |
| 1449402_at   | Chst7         | 1.51 | 0.000290277 |
| 1459679_s_at | Myo1b         | 1.53 | 0.000291706 |
| 1421976_at   | Mmp19         | 1.53 | 0.000294295 |
| 1429676_at   | NA            | 1.51 | 0.000294902 |
| 1416418_at   | Gabarapl1     | 1.50 | 0.000297058 |
| 1451754_a_at | Wdr45         | 1.51 | 0.000298877 |
| 1445608_at   | 9130204L05Rik | 1.51 | 0.000303606 |
| 1453365_at   | Rabgap1l      | 1.51 | 0.000304131 |
| 1456516_x_at | NA            | 1.51 | 0.000307853 |
| 1441949_x_at | Slc39a6       | 1.51 | 0.000308121 |
| 1434832_at   | Foxo3         | 1.51 | 0.000309587 |
| 1441935_at   | Ankra2        | 1.51 | 0.000328925 |
| 1455186_a_at | 1190003J15Rik | 1.50 | 0.000330809 |
| 1426460_a_at | Ugp2          | 1.51 | 0.000332725 |
| 1426348_at   | Col4a1        | 1.50 | 0.000336977 |
| 1429654_at   | Dppa2         | 1.50 | 0.000339847 |
| 1443594_at   | AI043046      | 1.50 | 0.000339879 |
| 1423065_at   | Dnmt3a        | 1.50 | 0.000345219 |
| 1425983_x_at | Hipk2         | 1.51 | 0.000345666 |
| 1446048_at   | NA            | 1.51 | 0.000348676 |
| 1435158_at   | Rbm12b        | 1.52 | 0.000363129 |
| 1448747_at   | Fbxo32        | 1.52 | 0.000371087 |
| 1420981_a_at | Lmo4          | 1.51 | 0.000377363 |
| 1419356_at   | Klf7          | 1.51 | 0.000378802 |
| 1431786_s_at | 1190003J15Rik | 1.52 | 0.000379807 |
| 1418280_at   | Klf6          | 1.51 | 0.000391098 |
| 1443889_at   | 9030619P08Rik | 1.54 | 0.000397808 |
| 1416344_at   | Lamp2         | 1.50 | 0.000417602 |
| 1416318_at   | Serpinb1a     | 1.51 | 0.000456087 |
| 1447116_at   | NA            | 1.51 | 0.00047982  |

Table S1b. Probe set for *Cebpg*<sup>-/-</sup> vs. WT MEFs (657 probes)

| ProbeID      | GeneSymbol    | Fold Change | p-value  |
|--------------|---------------|-------------|----------|
| 1448239_at   | Hmox1         | 6.63        | 2.06E-06 |
| 1428942_at   | Mt2           | 5.61        | 2.71E-06 |
| 1438672_at   | Parvb         | 2.89        | 3.58E-06 |
| 1428705_at   | 1700007K13Rik | 3.75        | 3.58E-06 |
| 1418945_at   | Mmp3          | 11.58       | 4.51E-06 |
| 1422557_s_at | Mt1           | 3.38        | 9.52E-06 |
| 1418649_at   | Egln3         | 4.38        | 1.00E-05 |
| 1452388_at   | Hspa1a        | 4.20        | 1.18E-05 |
| 1416077_at   | Adm           | 3.55        | 1.83E-05 |
| 1417256_at   | Mmp13         | 22.45       | 2.07E-05 |
| 1422573_at   | Ampd3         | 5.63        | 2.33E-05 |
| 1420664_s_at | Procr         | 3.19        | 2.88E-05 |
| 1439050_at   | NA            | 2.46        | 3.39E-05 |
| 1452106_at   | Npnt          | 1.97        | 3.51E-05 |
| 1434763_at   | Orai2         | 2.20        | 3.51E-05 |
| 1418627_at   | Gclm          | 2.20        | 3.92E-05 |
| 1454795_at   | Cobll1        | 2.43        | 3.92E-05 |
| 1424126_at   | Alas1         | 1.87        | 3.92E-05 |
| 1423605_a_at | Mdm2          | 2.09        | 3.92E-05 |
| 1434044_at   | Repin1        | 2.08        | 5.16E-05 |
| 1416592_at   | Glrx          | 2.77        | 5.86E-05 |
| 1447839_x_at | Adm           | 3.64        | 6.19E-05 |
| 1429514_at   | Ppap2b        | 2.57        | 6.20E-05 |
| 1419456_at   | Dcxr          | 2.26        | 6.77E-05 |
| 1427718_a_at | Mdm2          | 2.40        | 6.81E-05 |
| 1450693_at   | Rgs17         | 2.21        | 7.46E-05 |
| 1451386_at   | Blvrb         | 2.72        | 7.51E-05 |
| 1416368_at   | Gsta4         | 2.73        | 8.37E-05 |
| 1422470_at   | Bnip3         | 2.63        | 8.37E-05 |
| 1417406_at   | Sertad1       | 1.82        | 9.02E-05 |
| 1416593_at   | Glrx          | 2.97        | 9.51E-05 |
| 1421031_a_at | 2310016C08Rik | 2.03        | 9.51E-05 |
| 1417488_at   | Fosl1         | 2.11        | 9.51E-05 |
| 1449450_at   | Ptges         | 2.82        | 9.64E-05 |
| 1456792_at   | NA            | 2.09        | 9.89E-05 |
| 1449965_at   | Mcpt8         | 6.76        | 9.89E-05 |
| 1436538_at   | Ankrd37       | 4.83        | 9.89E-05 |
| 1427760_s_at | NA            | 4.24        | 1.11E-04 |
| 1417441_at   | Dnajc12       | 1.88        | 1.12E-04 |
| 1430762_at   | 4833427G06Rik | 1.86        | 1.12E-04 |
| 1450409_a_at | Slc48a1       | 2.07        | 1.12E-04 |
| 1448908_at   | Ppap2b        | 2.86        | 1.12E-04 |
| 1452160_at   | Tiparp        | 1.94        | 1.12E-04 |
| 1417311_at   | Crip2         | 2.25        | 1.13E-04 |
| 1420696_at   | Sema3c        | 2.02        | 1.19E-04 |
| 1417487_at   | Fosl1         | 2.10        | 1.20E-04 |
| 1419082_at   | Serpib2       | 10.73       | 1.30E-04 |
| 1421041_s_at | NA            | 1.92        | 1.32E-04 |
| 1433583_at   | Zfp365        | 1.95        | 1.34E-04 |
| 1425145_at   | Il1rl1        | 2.17        | 1.34E-04 |
| 1423413_at   | Ndrp1         | 2.62        | 1.47E-04 |

|              |               |      |          |
|--------------|---------------|------|----------|
| 1434815_a_at | Mapkapk3      | 1.79 | 1.60E-04 |
| 1426454_at   | Arhgdib       | 1.88 | 1.60E-04 |
| 1416455_a_at | Cryab         | 1.80 | 1.60E-04 |
| 1434499_a_at | Ldhb          | 1.76 | 1.73E-04 |
| 1419431_at   | Ereg          | 2.44 | 1.81E-04 |
| 1460555_at   | Fam65b        | 2.03 | 1.88E-04 |
| 1427912_at   | Cbr3          | 2.24 | 1.88E-04 |
| 1435135_at   | Nceh1         | 2.16 | 1.90E-04 |
| 1450004_at   | Tslp          | 2.74 | 2.02E-04 |
| 1451680_at   | Srxn1         | 2.01 | 2.02E-04 |
| 1416779_at   | Sdpr          | 2.30 | 2.02E-04 |
| 1416432_at   | Pfkfb3        | 2.20 | 2.02E-04 |
| 1439779_at   | Rgs17         | 1.89 | 2.03E-04 |
| 1453006_at   | Fgfbp3        | 2.44 | 2.03E-04 |
| 1434043_a_at | Repin1        | 1.85 | 2.03E-04 |
| 1416778_at   | Sdpr          | 2.21 | 2.13E-04 |
| 1448529_at   | Thbd          | 2.14 | 2.17E-04 |
| 1434171_at   | Zfp874        | 1.66 | 2.26E-04 |
| 1439747_at   | Ptges         | 3.38 | 2.31E-04 |
| 1453275_at   | 2310002L13Rik | 4.32 | 2.56E-04 |
| 1449982_at   | Il11          | 2.48 | 2.56E-04 |
| 1423537_at   | Gap43         | 1.98 | 2.79E-04 |
| 1426875_s_at | Srxn1         | 1.93 | 2.93E-04 |
| 1417777_at   | Ptgr1         | 1.79 | 3.06E-04 |
| 1443832_s_at | Sdpr          | 2.43 | 3.06E-04 |
| 1449249_at   | Pcdh7         | 2.01 | 3.25E-04 |
| 1416029_at   | Klf10         | 1.65 | 3.30E-04 |
| 1416271_at   | Perp          | 3.91 | 3.43E-04 |
| 1455324_at   | Plcx2         | 1.80 | 3.56E-04 |
| 1455197_at   | Rnd1          | 2.11 | 3.59E-04 |
| 1433506_at   | Lrrc8d        | 2.01 | 3.59E-04 |
| 1426452_a_at | Rab30         | 1.83 | 3.63E-04 |
| 1416666_at   | Serpine2      | 1.74 | 3.63E-04 |
| 1417551_at   | Cln3          | 2.19 | 3.63E-04 |
| 1452907_at   | Galc          | 1.72 | 3.77E-04 |
| 1448237_x_at | Ldhb          | 1.66 | 3.79E-04 |
| 1427126_at   | Hspa1b        | 1.84 | 4.27E-04 |
| 1452796_at   | Def6          | 1.70 | 4.27E-04 |
| 1418539_a_at | Ptpre         | 2.08 | 4.27E-04 |
| 1418872_at   | Abcb1b        | 2.42 | 4.27E-04 |
| 1435462_at   | Plcx2         | 1.73 | 4.27E-04 |
| 1452107_s_at | Npnt          | 1.87 | 4.32E-04 |
| 1423706_a_at | Pgd           | 1.66 | 4.35E-04 |
| 1425155_x_at | Csf1          | 1.81 | 4.35E-04 |
| 1452288_at   | Mtmr10        | 1.77 | 4.35E-04 |
| 1441971_at   | NA            | 2.34 | 4.50E-04 |
| 1416926_at   | Trp53inp1     | 1.61 | 4.70E-04 |
| 1450214_at   | NA            | 1.93 | 4.70E-04 |
| 1419309_at   | Pdpn          | 2.08 | 4.70E-04 |
| 1460667_at   | U90926        | 4.57 | 4.70E-04 |
| 1417273_at   | Pdk4          | 2.24 | 4.72E-04 |
| 1451612_at   | Mt1           | 1.82 | 4.72E-04 |
| 1435647_at   | Ikbkg         | 1.82 | 4.76E-04 |
| 1456891_at   | Dennd2c       | 1.57 | 4.76E-04 |
| 1431049_at   | Ica1l         | 1.70 | 4.76E-04 |



|                 |               |      |          |
|-----------------|---------------|------|----------|
| 1452050_at      | Camk1d        | 2.18 | 4.76E-04 |
| 1425420_s_at    | Lats2         | 1.92 | 4.76E-04 |
| 1450063_at      | NA            | 2.19 | 4.76E-04 |
| 1452583_s_at    | Galm          | 1.65 | 4.84E-04 |
| 1443673_x_at    | NA            | 1.80 | 4.84E-04 |
| 1422624_at      | Rev1          | 1.56 | 4.99E-04 |
| 1448871_at      | Mapk13        | 3.29 | 5.13E-04 |
| 1443870_at      | Abcc4         | 1.73 | 5.18E-04 |
| 1424829_at      | A830007P12Rik | 1.94 | 5.18E-04 |
| 1417164_at      | Dusp10        | 1.71 | 5.22E-04 |
| 1423627_at      | Nqo1          | 2.35 | 5.42E-04 |
| 1438480_a_at    | Thyn1         | 1.53 | 5.52E-04 |
| 1433858_at      | Lrrc28        | 1.62 | 5.55E-04 |
| 1417902_at      | Slc19a2       | 1.59 | 5.64E-04 |
| AFFX-18SRNAMur/ | NA            | 1.85 | 5.78E-04 |
| 1424697_at      | Dtwd1         | 1.59 | 5.79E-04 |
| 1419647_a_at    | Ier3          | 1.72 | 5.85E-04 |
| 1453092_at      | Crct1         | 3.51 | 5.86E-04 |
| 1449449_at      | Ptges         | 2.32 | 5.95E-04 |
| 1450410_a_at    | Slc48a1       | 1.86 | 5.98E-04 |
| 1421679_a_at    | Cdkn1a        | 1.60 | 6.18E-04 |
| 1425351_at      | Srxn1         | 1.82 | 6.30E-04 |
| 1424528_at      | Cgref1        | 1.60 | 6.55E-04 |
| 1448877_at      | Dlx2          | 2.05 | 6.55E-04 |
| 1453139_at      | Nudt12        | 1.84 | 6.64E-04 |
| 1421209_s_at    | Ikbkg         | 1.62 | 6.79E-04 |
| 1435899_at      | Kdsr          | 1.58 | 6.79E-04 |
| 1455282_x_at    | Alas1         | 1.56 | 6.87E-04 |
| 1424352_at      | Cyp4a12a      | 2.03 | 7.21E-04 |
| 1420558_at      | Selp          | 1.69 | 7.26E-04 |
| 1416184_s_at    | Hmga1         | 1.88 | 7.26E-04 |
| 1420913_at      | Slco2a1       | 1.74 | 7.26E-04 |
| 1423543_at      | Swap70        | 1.56 | 7.26E-04 |
| 1417952_at      | Cyp2j6        | 1.61 | 7.45E-04 |
| 1456643_at      | 9230114K14Rik | 1.63 | 7.76E-04 |
| 1438030_at      | Rasgrp3       | 1.81 | 7.89E-04 |
| 1438148_at      | Cxcl3         | 2.76 | 7.93E-04 |
| 1426037_a_at    | Rgs16         | 2.05 | 7.93E-04 |
| 1448211_at      | Atp6v0e2      | 2.55 | 7.93E-04 |
| 1418209_a_at    | Pfn2          | 1.56 | 8.00E-04 |
| 1424777_at      | Dcaf4         | 1.59 | 8.02E-04 |
| 1434369_a_at    | Cryab         | 1.69 | 8.02E-04 |
| 1442156_at      | E030030I06Rik | 1.57 | 8.19E-04 |
| 1449483_at      | Polk          | 1.58 | 8.30E-04 |
| 1427127_x_at    | Hspa1b        | 1.71 | 8.79E-04 |
| 1418210_at      | Pfn2          | 1.51 | 8.98E-04 |
| 1426721_s_at    | Tiparp        | 1.68 | 9.02E-04 |
| 1451751_at      | Ddit4l        | 1.98 | 9.02E-04 |
| 1416824_at      | B230118H07Rik | 1.57 | 9.04E-04 |
| 1420249_s_at    | Ccl6          | 3.88 | 9.04E-04 |
| 1416527_at      | Rab32         | 2.06 | 9.64E-04 |
| 1420641_a_at    | Sqrdl         | 2.16 | 9.79E-04 |
| 1429348_at      | Sema3c        | 2.33 | 9.92E-04 |
| 1440325_at      | NA            | 1.57 | 9.92E-04 |
| 1451339_at      | Suox          | 1.64 | 9.95E-04 |

|              |               |      |          |
|--------------|---------------|------|----------|
| 1427717_at   | Cd80          | 2.06 | 9.95E-04 |
| 1420499_at   | Gch1          | 1.89 | 9.95E-04 |
| 1439093_at   | NA            | 1.94 | 1.01E-03 |
| 1418248_at   | Gla           | 1.57 | 1.01E-03 |
| 1421296_at   | Tnfrsf10b     | 1.70 | 1.01E-03 |
| 1425186_at   | Lmbrd1        | 1.57 | 1.01E-03 |
| 1434709_at   | Nrcam         | 2.92 | 1.02E-03 |
| 1418955_at   | Zfp93         | 1.52 | 1.02E-03 |
| 1426871_at   | Fbxo33        | 1.55 | 1.03E-03 |
| 1437494_at   | Mapkapk3      | 1.58 | 1.04E-03 |
| 1436304_at   | Tmem200a      | 1.54 | 1.05E-03 |
| 1421529_a_at | Txnrd1        | 1.64 | 1.08E-03 |
| 1441931_x_at | NA            | 1.51 | 1.08E-03 |
| 1426584_a_at | Sord          | 1.59 | 1.09E-03 |
| 1449559_at   | Msx2          | 1.96 | 1.12E-03 |
| 1426988_at   | Klhdc5        | 1.60 | 1.12E-03 |
| 1433909_at   | Syt17         | 1.79 | 1.13E-03 |
| 1453422_a_at | 1110020G09Rik | 1.54 | 1.20E-03 |
| 1455898_x_at | Slc2a3        | 1.99 | 1.20E-03 |
| 1426808_at   | Lgals3        | 3.31 | 1.25E-03 |
| 1424951_at   | Baiap2l1      | 1.79 | 1.25E-03 |
| 1458541_at   | Dctn4         | 1.57 | 1.26E-03 |
| 1424306_at   | Elovl4        | 2.16 | 1.26E-03 |
| 1431050_at   | Rps6ka5       | 1.62 | 1.26E-03 |
| 1423166_at   | Cd36          | 6.21 | 1.26E-03 |
| 1421038_a_at | Kcnn4         | 2.06 | 1.27E-03 |
| 1425025_at   | Tmem106a      | 1.96 | 1.28E-03 |
| 1437052_s_at | Slc2a3        | 2.30 | 1.29E-03 |
| 1418293_at   | Ifit2         | 1.50 | 1.31E-03 |
| 1429262_at   | Rassf6        | 1.62 | 1.33E-03 |
| 1415940_at   | Zfand2a       | 1.85 | 1.38E-03 |
| 1450883_a_at | Cd36          | 6.58 | 1.41E-03 |
| 1451411_at   | Gprc5b        | 1.82 | 1.41E-03 |
| 1429861_at   | Pcdh9         | 1.58 | 1.41E-03 |
| 1428447_at   | Tmem14a       | 1.79 | 1.42E-03 |
| 1454617_at   | Arrdc3        | 1.81 | 1.43E-03 |
| 1448117_at   | Kitl          | 2.05 | 1.43E-03 |
| 1426261_s_at | NA            | 2.21 | 1.44E-03 |
| 1421227_at   | NA            | 3.08 | 1.44E-03 |
| 1432059_x_at | 5031425E22Rik | 1.53 | 1.44E-03 |
| 1452161_at   | Tiparp        | 1.69 | 1.44E-03 |
| 1426471_at   | Zfp52         | 1.87 | 1.45E-03 |
| 1438883_at   | Fgf5          | 1.77 | 1.45E-03 |
| 1427021_s_at | NA            | 1.76 | 1.52E-03 |
| 1448771_a_at | Fth1          | 1.73 | 1.53E-03 |
| 1449702_at   | Zfand2a       | 1.70 | 1.55E-03 |
| 1434909_at   | Rragd         | 1.60 | 1.55E-03 |
| 1451718_at   | Plp1          | 2.74 | 1.55E-03 |
| 1418540_a_at | Ptpre         | 2.30 | 1.57E-03 |
| 1418279_a_at | Akap1         | 1.60 | 1.57E-03 |
| 1451950_a_at | Cd80          | 2.85 | 1.57E-03 |
| 1416727_a_at | Cyb5          | 1.66 | 1.59E-03 |
| 1415941_s_at | Zfand2a       | 1.78 | 1.59E-03 |
| 1448890_at   | Klf2          | 1.60 | 1.59E-03 |
| 1419490_at   | Fam19a5       | 1.66 | 1.60E-03 |

|              |               |      |          |
|--------------|---------------|------|----------|
| 1418181_at   | Ptp4a3        | 1.87 | 1.61E-03 |
| 1454801_at   | Ankrd28       | 1.56 | 1.62E-03 |
| 1420450_at   | Mmp10         | 2.32 | 1.64E-03 |
| 1458236_at   | NA            | 1.93 | 1.65E-03 |
| 1419816_s_at | Errfi1        | 1.83 | 1.68E-03 |
| 1421840_at   | Abca1         | 2.42 | 1.68E-03 |
| 1454690_at   | Ikbkg         | 1.50 | 1.75E-03 |
| 1456130_at   | NA            | 3.24 | 1.78E-03 |
| 1438488_at   | Esd           | 1.65 | 1.81E-03 |
| 1421498_a_at | 2010204K13Rik | 1.64 | 1.86E-03 |
| 1450780_s_at | Hmga2         | 1.52 | 1.90E-03 |
| 1426260_a_at | NA            | 2.30 | 1.90E-03 |
| 1419501_at   | Polk          | 1.55 | 1.90E-03 |
| 1416183_a_at | Ldhb          | 1.51 | 1.96E-03 |
| 1435646_at   | Ikbkg         | 1.62 | 1.98E-03 |
| 1450161_at   | Ikbkg         | 1.52 | 1.98E-03 |
| 1450853_at   | Tle4          | 1.57 | 2.00E-03 |
| 1425129_a_at | Taldo1        | 1.53 | 2.01E-03 |
| 1416308_at   | Ugdh          | 1.55 | 2.01E-03 |
| 1422444_at   | Itga6         | 2.75 | 2.01E-03 |
| 1430776_s_at | Ankrd24       | 1.71 | 2.02E-03 |
| 1430640_a_at | Prkar2b       | 1.74 | 2.06E-03 |
| 1422344_s_at | Tnfrsf10b     | 1.60 | 2.08E-03 |
| 1448273_at   | Gss           | 1.52 | 2.08E-03 |
| 1437197_at   | Sorbs2        | 1.92 | 2.09E-03 |
| 1455235_x_at | Ldhb          | 1.59 | 2.11E-03 |
| 1449195_s_at | Cxcl16        | 1.78 | 2.20E-03 |
| 1459981_s_at | NA            | 1.62 | 2.20E-03 |
| 1428393_at   | Nrn1          | 3.15 | 2.21E-03 |
| 1438664_at   | Prkar2b       | 1.68 | 2.25E-03 |
| 1448340_at   | Tmem30a       | 1.55 | 2.25E-03 |
| 1421151_a_at | Epha2         | 1.68 | 2.28E-03 |
| 1438169_a_at | Frm4b         | 2.83 | 2.31E-03 |
| 1417373_a_at | Tuba4a        | 1.70 | 2.36E-03 |
| 1432826_a_at | Cd80          | 2.09 | 2.39E-03 |
| 1452318_a_at | Hspa1b        | 1.71 | 2.40E-03 |
| 1452207_at   | Cited2        | 1.59 | 2.40E-03 |
| 1417266_at   | Ccl6          | 5.50 | 2.40E-03 |
| 1449244_at   | Cdh2          | 1.50 | 2.42E-03 |
| 1456181_at   | Wdr91         | 1.52 | 2.43E-03 |
| 1417409_at   | Jun           | 1.66 | 2.45E-03 |
| 1427074_at   | Pcmdt2        | 1.57 | 2.47E-03 |
| 1420342_at   | Gdap10        | 1.78 | 2.55E-03 |
| 1422169_a_at | Bdnf          | 1.57 | 2.56E-03 |
| 1420760_s_at | Ndr1          | 1.70 | 2.56E-03 |
| 1435945_a_at | Kcnn4         | 1.76 | 2.57E-03 |
| 1418480_at   | Ppbp          | 3.89 | 2.61E-03 |
| 1419457_at   | Rgnef         | 1.56 | 2.62E-03 |
| 1433536_at   | Lrp11         | 1.59 | 2.64E-03 |
| 1435645_at   | NA            | 1.79 | 2.67E-03 |
| 1435436_at   | Epas1         | 1.56 | 2.67E-03 |
| 1449358_at   | D6Mm5e        | 1.57 | 2.67E-03 |
| 1439332_at   | Ddit4l        | 1.68 | 2.68E-03 |
| 1460053_at   | Smyd4         | 1.59 | 2.68E-03 |
| 1423192_at   | Pspc1         | 1.50 | 2.74E-03 |

|              |               |      |          |
|--------------|---------------|------|----------|
| 1448698_at   | Ccnd1         | 1.72 | 2.75E-03 |
| 1424529_s_at | Cgref1        | 1.52 | 2.79E-03 |
| 1452203_at   | Obfc2a        | 1.88 | 2.81E-03 |
| 1416645_a_at | Afp           | 2.36 | 2.81E-03 |
| 1460409_at   | Cpt1a         | 1.66 | 2.81E-03 |
| 1424701_at   | Pcdh20        | 1.97 | 2.86E-03 |
| 1417377_at   | Cadm1         | 2.03 | 2.89E-03 |
| 1416658_at   | Frzb          | 1.78 | 2.93E-03 |
| 1449079_s_at | St3gal6       | 2.49 | 2.95E-03 |
| 1424987_at   | 5430435G22Rik | 1.88 | 2.98E-03 |
| 1431056_a_at | Lpl           | 1.92 | 2.99E-03 |
| 1424067_at   | Icam1         | 2.09 | 3.02E-03 |
| 1451019_at   | Ctsf          | 1.57 | 3.02E-03 |
| 1428559_at   | Kdsr          | 1.50 | 3.02E-03 |
| 1428671_at   | 2200002D01Rik | 1.93 | 3.02E-03 |
| 1436164_at   | Slc30a1       | 1.53 | 3.02E-03 |
| 1425536_at   | Stx3          | 1.52 | 3.02E-03 |
| 1416129_at   | Errfi1        | 1.71 | 3.02E-03 |
| 1434150_a_at | NA            | 1.88 | 3.07E-03 |
| 1452291_at   | Arap2         | 1.76 | 3.07E-03 |
| 1455214_at   | Mitf          | 1.75 | 3.18E-03 |
| 1452123_s_at | Frmd4b        | 1.69 | 3.21E-03 |
| 1421830_at   | NA            | 1.75 | 3.24E-03 |
| 1416967_at   | Sox2          | 2.15 | 3.27E-03 |
| 1416968_a_at | Hsd3b7        | 1.63 | 3.29E-03 |
| 1456174_x_at | Ndrp1         | 1.64 | 3.29E-03 |
| 1418648_at   | Egln3         | 1.85 | 3.34E-03 |
| 1435680_a_at | Dpp7          | 1.58 | 3.36E-03 |
| 1417130_s_at | Angptl4       | 2.50 | 3.36E-03 |
| 1451021_a_at | Klf5          | 1.50 | 3.40E-03 |
| 1444052_at   | Flt4          | 2.06 | 3.44E-03 |
| 1460220_a_at | Csf1          | 1.65 | 3.45E-03 |
| 1454890_at   | Amot          | 1.88 | 3.48E-03 |
| 1428081_at   | Klhl21        | 1.51 | 3.49E-03 |
| 1456214_at   | Pcdh7         | 1.52 | 3.50E-03 |
| 1424412_at   | Ogfrl1        | 2.16 | 3.52E-03 |
| 1417395_at   | Klf4          | 1.61 | 3.53E-03 |
| 1417611_at   | Tmem37        | 2.05 | 3.53E-03 |
| 1417719_at   | Sap30         | 1.52 | 3.55E-03 |
| 1438097_at   | Rab20         | 1.70 | 3.67E-03 |
| 1459897_a_at | Sbsn          | 2.01 | 3.72E-03 |
| 1456736_x_at | Mff           | 1.50 | 3.73E-03 |
| 1422476_at   | Ifi30         | 1.68 | 3.75E-03 |
| 1442350_at   | NA            | 3.16 | 3.75E-03 |
| 1426806_at   | Obfc2a        | 1.85 | 3.78E-03 |
| 1448306_at   | Nfkbia        | 1.60 | 3.84E-03 |
| 1422317_a_at | Il1rl1        | 2.05 | 3.85E-03 |
| 1457373_at   | NA            | 1.91 | 3.93E-03 |
| 1422168_a_at | Bdnf          | 1.58 | 3.95E-03 |
| 1428732_at   | 1700008J07Rik | 1.53 | 4.02E-03 |
| 1443612_at   | Ano3          | 1.59 | 4.05E-03 |
| 1456475_s_at | Prkar2b       | 1.53 | 4.06E-03 |
| 1460257_a_at | NA            | 1.60 | 4.12E-03 |
| 1452719_at   | Zdhhc24       | 1.58 | 4.15E-03 |
| 1426928_at   | Ccdc93        | 1.53 | 4.17E-03 |

|              |               |      |          |
|--------------|---------------|------|----------|
| 1421011_at   | Hsd17b11      | 2.13 | 4.18E-03 |
| 1422445_at   | Itga6         | 2.30 | 4.29E-03 |
| 1417995_at   | Ptpn22        | 1.99 | 4.31E-03 |
| 1424940_s_at | BC022687      | 1.50 | 4.31E-03 |
| 1424414_at   | Ogfrl1        | 1.60 | 4.31E-03 |
| 1455227_at   | Nceh1         | 1.99 | 4.31E-03 |
| 1437345_a_at | Bscl2         | 1.50 | 4.35E-03 |
| 1425951_a_at | Clec4n        | 4.83 | 4.36E-03 |
| 1449153_at   | Mmp12         | 4.84 | 4.39E-03 |
| 1435749_at   | Gda           | 1.83 | 4.40E-03 |
| 1434559_at   | Stx3          | 1.57 | 4.40E-03 |
| 1448562_at   | Upp1          | 1.63 | 4.41E-03 |
| 1450976_at   | Ndrgr1        | 1.58 | 4.44E-03 |
| 1450171_x_at | Gzme          | 2.61 | 4.44E-03 |
| 1418824_at   | Arf6          | 1.51 | 4.44E-03 |
| 1429352_at   | Mocos         | 1.56 | 4.55E-03 |
| 1442537_at   | NA            | 1.62 | 4.56E-03 |
| 1429759_at   | Rps6ka6       | 1.68 | 4.57E-03 |
| 1432304_a_at | 9030624J02Rik | 1.57 | 4.61E-03 |
| 1448300_at   | Mgst3         | 1.67 | 4.68E-03 |
| 1426235_a_at | Glul          | 1.68 | 4.68E-03 |
| 1426337_a_at | Tead4         | 1.53 | 4.75E-03 |
| 1417816_s_at | Serinc3       | 1.54 | 4.76E-03 |
| 1440559_at   | Hmga2-ps1     | 2.07 | 4.98E-03 |
| 1415855_at   | Kitl          | 2.16 | 5.02E-03 |
| 1417378_at   | Cadm1         | 2.03 | 5.04E-03 |
| 1448595_a_at | Bex1          | 1.74 | 5.09E-03 |
| 1415947_at   | Creg1         | 1.79 | 5.27E-03 |
| 1420746_at   | Prl3a1        | 2.18 | 5.31E-03 |
| 1422033_a_at | NA            | 1.77 | 5.35E-03 |
| 1418762_at   | Cd55          | 1.83 | 5.35E-03 |
| 1451584_at   | Havcr2        | 1.83 | 5.39E-03 |
| 1422924_at   | Tnfrsf9       | 1.63 | 5.39E-03 |
| 1427932_s_at | NA            | 1.63 | 5.42E-03 |
| 1431182_at   | NA            | 1.54 | 5.47E-03 |
| 1428083_at   | Neat1         | 1.85 | 5.48E-03 |
| 1426599_a_at | Slc2a1        | 1.56 | 5.61E-03 |
| 1457270_at   | Gas7          | 2.13 | 5.70E-03 |
| 1435354_at   | Kcnj15        | 1.79 | 5.70E-03 |
| 1424354_at   | Tmem140       | 1.70 | 5.72E-03 |
| 1448914_a_at | Csf1          | 1.88 | 5.77E-03 |
| 1417732_at   | Anxa8         | 2.19 | 5.83E-03 |
| 1432466_a_at | Apoe          | 5.75 | 5.88E-03 |
| 1429203_at   | 2410076I21Rik | 1.83 | 5.90E-03 |
| 1439630_x_at | Sbsn          | 2.02 | 5.92E-03 |
| 1425154_a_at | Csf1          | 1.70 | 5.94E-03 |
| 1444139_at   | Ddit4l        | 1.56 | 5.94E-03 |
| 1453238_s_at | NA            | 1.55 | 6.01E-03 |
| 1454903_at   | Ngfr          | 1.52 | 6.03E-03 |
| 1443906_at   | Cd55          | 1.91 | 6.13E-03 |
| 1448136_at   | Enpp2         | 1.86 | 6.18E-03 |
| 1425126_at   | Ncam1         | 1.68 | 6.28E-03 |
| 1451452_a_at | Rgs16         | 1.92 | 6.29E-03 |
| 1417625_s_at | Cxcr7         | 1.63 | 6.37E-03 |
| 1429205_at   | Mllt3         | 1.72 | 6.49E-03 |

|              |               |      |          |
|--------------|---------------|------|----------|
| 1429212_a_at | Lrrc51        | 1.60 | 6.50E-03 |
| 1452240_at   | Brunol4       | 1.65 | 6.53E-03 |
| 1427038_at   | Penk          | 1.73 | 6.53E-03 |
| 1454858_x_at | Mettl7a1      | 1.62 | 6.58E-03 |
| 1421308_at   | Car13         | 1.52 | 6.73E-03 |
| 1417420_at   | Ccnd1         | 1.54 | 6.73E-03 |
| 1435134_at   | Nceh1         | 1.58 | 6.77E-03 |
| 1420380_at   | Ccl2          | 2.63 | 6.80E-03 |
| 1443814_x_at | Ctsh          | 1.76 | 6.81E-03 |
| 1451210_at   | Ppap2c        | 1.52 | 6.85E-03 |
| 1439189_at   | Fnip2         | 1.52 | 6.88E-03 |
| 1455265_a_at | Rgs16         | 1.54 | 6.96E-03 |
| 1437190_at   | Styk1         | 1.62 | 6.96E-03 |
| 1434431_x_at | NA            | 1.59 | 7.02E-03 |
| 1418357_at   | Foxg1         | 2.81 | 7.18E-03 |
| 1421134_at   | Areg          | 2.82 | 7.27E-03 |
| 1440076_at   | NA            | 1.67 | 7.39E-03 |
| 1417376_a_at | Cadm1         | 1.86 | 7.57E-03 |
| 1417936_at   | Ccl9          | 4.22 | 7.65E-03 |
| 1415904_at   | Lpl           | 1.85 | 7.71E-03 |
| 1450241_a_at | Evi2a         | 3.25 | 7.73E-03 |
| 1418296_at   | Fxyd5         | 1.58 | 8.08E-03 |
| 1459713_s_at | Ano1          | 2.47 | 8.17E-03 |
| 1417109_at   | Tinagl1       | 1.60 | 8.18E-03 |
| 1445882_at   | Cd300lb       | 3.14 | 8.37E-03 |
| 1454769_at   | Tatdn2        | 1.78 | 8.41E-03 |
| 1438405_at   | Fgf7          | 1.77 | 8.52E-03 |
| 1436890_at   | Uap1l1        | 1.53 | 8.53E-03 |
| 1449959_x_at | Lce1h         | 4.71 | 8.53E-03 |
| 1448028_at   | Tbc1d24       | 1.54 | 8.61E-03 |
| 1428749_at   | Dmxi2         | 1.64 | 8.63E-03 |
| 1453708_a_at | Gsto2         | 1.89 | 8.68E-03 |
| 1419458_at   | Rgnef         | 1.59 | 8.69E-03 |
| 1452492_a_at | Slc37a2       | 1.94 | 8.73E-03 |
| 1454806_at   | Fam49a        | 1.53 | 8.76E-03 |
| 1425789_s_at | Anxa8         | 1.97 | 9.00E-03 |
| 1428834_at   | Dusp4         | 1.68 | 9.03E-03 |
| 1422782_s_at | Tlr3          | 1.51 | 9.07E-03 |
| 1426929_at   | Brunol4       | 1.64 | 9.18E-03 |
| 1423285_at   | Coch          | 2.68 | 9.18E-03 |
| 1419482_at   | C3ar1         | 3.06 | 9.19E-03 |
| 1419209_at   | Cxcl1         | 4.68 | 9.28E-03 |
| 1438602_s_at | Masp1         | 1.64 | 9.28E-03 |
| 1453345_at   | Nipal1        | 1.81 | 9.30E-03 |
| 1459838_s_at | Btbd11        | 2.04 | 9.36E-03 |
| 1458518_at   | Cpeb2         | 1.76 | 9.45E-03 |
| 1448761_a_at | Copg2         | 1.50 | 9.47E-03 |
| 1425225_at   | Fcgr4         | 1.75 | 9.53E-03 |
| 1423213_at   | Plxnc1        | 1.66 | 9.57E-03 |
| 1424999_at   | 1700022C21Rik | 1.50 | 9.59E-03 |
| 1437486_at   | Gprc5a        | 1.62 | 9.61E-03 |
| 1437442_at   | Pcdh7         | 1.66 | 9.62E-03 |
| 1429055_at   | 4930506M07Rik | 2.48 | 9.67E-03 |
| 1452141_a_at | Sepp1         | 2.65 | 9.78E-03 |
| 1433691_at   | Ppp1r3c       | 1.52 | 9.80E-03 |

|                 |               |      |          |
|-----------------|---------------|------|----------|
| 1434252_at      | Tmcc3         | 1.75 | 9.81E-03 |
| 1426604_at      | Rnasel        | 1.76 | 9.93E-03 |
| 1439768_x_at    | Sema4f        | 1.81 | 9.96E-03 |
| 1424783_a_at    | NA            | 1.81 | 1.00E-02 |
| 1450826_a_at    | Saa3          | 3.35 | 1.00E-02 |
| 1442019_at      | NA            | 1.62 | 1.01E-02 |
| 1449383_at      | Adssl1        | 1.85 | 1.01E-02 |
| 1454889_x_at    | Tmcc3         | 1.61 | 1.02E-02 |
| 1418126_at      | Ccl5          | 3.15 | 1.03E-02 |
| 1460123_at      | Gpr1          | 1.75 | 1.03E-02 |
| 1420502_at      | Sat1          | 1.54 | 1.03E-02 |
| 1447830_s_at    | Rgs2          | 2.01 | 1.03E-02 |
| 1435695_a_at    | Ggct          | 1.86 | 1.04E-02 |
| 1436530_at      | Gm11428       | 2.15 | 1.04E-02 |
| 1422668_at      | Serpib9b      | 1.80 | 1.04E-02 |
| 1449824_at      | Prg4          | 2.23 | 1.05E-02 |
| 1434253_s_at    | Tmcc3         | 1.71 | 1.05E-02 |
| 1427278_at      | Clip4         | 1.58 | 1.05E-02 |
| 1417263_at      | Ptgs2         | 1.92 | 1.05E-02 |
| 1450064_at      | NA            | 1.58 | 1.05E-02 |
| 1435836_at      | Pdk1          | 1.51 | 1.05E-02 |
| 1416016_at      | NA            | 1.52 | 1.07E-02 |
| 1415948_at      | Creg1         | 2.02 | 1.07E-02 |
| 1448303_at      | Gpnmb         | 2.78 | 1.08E-02 |
| 1428357_at      | 2610019F03Rik | 1.60 | 1.08E-02 |
| 1449078_at      | St3gal6       | 2.20 | 1.10E-02 |
| 1435504_at      | Clip4         | 1.95 | 1.10E-02 |
| 1460242_at      | Cd55          | 1.79 | 1.11E-02 |
| 1420804_s_at    | Clec4d        | 5.57 | 1.11E-02 |
| 1418947_at      | Nek3          | 1.59 | 1.11E-02 |
| 1428377_at      | Btbd11        | 2.40 | 1.12E-02 |
| 1421267_a_at    | Cited2        | 1.58 | 1.15E-02 |
| 1436999_at      | Pid1          | 1.64 | 1.16E-02 |
| 1417492_at      | Ctsb          | 2.18 | 1.18E-02 |
| 1430623_s_at    | Obfc2a        | 1.77 | 1.18E-02 |
| 1417394_at      | Klf4          | 1.56 | 1.18E-02 |
| 1434430_s_at    | NA            | 1.54 | 1.19E-02 |
| 1419248_at      | Rgs2          | 2.02 | 1.19E-02 |
| 1450868_at      | Hgsnat        | 1.53 | 1.21E-02 |
| 1425895_a_at    | Id1           | 1.60 | 1.22E-02 |
| 1417788_at      | Sncg          | 1.51 | 1.25E-02 |
| AFFX-18SRNAMur/ | NA            | 1.78 | 1.28E-02 |
| 1419714_at      | Cd274         | 1.73 | 1.29E-02 |
| 1425546_a_at    | Trf           | 2.36 | 1.29E-02 |
| 1439627_at      | Zic1          | 1.84 | 1.30E-02 |
| 1439122_at      | Ddx6          | 2.03 | 1.32E-02 |
| 1416002_x_at    | Cotl1         | 1.60 | 1.32E-02 |
| 1418365_at      | Ctsh          | 1.77 | 1.34E-02 |
| 1420796_at      | Ahrr          | 1.58 | 1.35E-02 |
| 1450731_s_at    | Tnfrsf21      | 1.78 | 1.36E-02 |
| 1434109_at      | Sh3bgrl2      | 1.93 | 1.36E-02 |
| 1417346_at      | Pycard        | 2.27 | 1.41E-02 |
| 1426600_at      | Slc2a1        | 1.62 | 1.42E-02 |
| 1419247_at      | Rgs2          | 1.78 | 1.42E-02 |
| 1437302_at      | Adrb2         | 1.55 | 1.43E-02 |

|              |               |      |          |
|--------------|---------------|------|----------|
| 1427673_a_at | Sema3e        | 1.60 | 1.47E-02 |
| 1420401_a_at | NA            | 1.86 | 1.47E-02 |
| 1424090_at   | Sdcbp2        | 2.19 | 1.47E-02 |
| 1449363_at   | Atf3          | 1.74 | 1.49E-02 |
| 1429060_at   | Malat1        | 1.72 | 1.49E-02 |
| 1423805_at   | Dab2          | 1.58 | 1.51E-02 |
| 1425264_s_at | Mbp           | 1.51 | 1.56E-02 |
| 1429173_at   | Dnase1l1      | 1.57 | 1.56E-02 |
| 1449442_at   | Pex11a        | 1.51 | 1.58E-02 |
| 1417268_at   | Cd14          | 2.58 | 1.58E-02 |
| 1417061_at   | Slc40a1       | 3.27 | 1.58E-02 |
| 1435748_at   | Gda           | 1.58 | 1.64E-02 |
| 1448898_at   | Ccl9          | 4.18 | 1.66E-02 |
| 1431890_a_at | Mllt3         | 1.67 | 1.66E-02 |
| 1416831_at   | Neu1          | 1.50 | 1.68E-02 |
| 1449201_at   | Star          | 2.21 | 1.69E-02 |
| 1450884_at   | Cd36          | 1.80 | 1.69E-02 |
| 1417419_at   | Ccnd1         | 1.59 | 1.69E-02 |
| 1423281_at   | Stmn2         | 1.73 | 1.70E-02 |
| 1442226_at   | Sema3e        | 1.67 | 1.70E-02 |
| 1449498_at   | Marco         | 2.37 | 1.73E-02 |
| 1416239_at   | Ass1          | 1.60 | 1.73E-02 |
| 1424413_at   | Ogfrl1        | 1.86 | 1.73E-02 |
| 1445504_at   | Gm5124        | 1.54 | 1.74E-02 |
| 1442082_at   | C3ar1         | 4.25 | 1.76E-02 |
| 1425906_a_at | Sema3e        | 1.78 | 1.77E-02 |
| 1423679_at   | 2810432L12Rik | 1.53 | 1.78E-02 |
| 1426389_at   | Camk1d        | 1.74 | 1.79E-02 |
| 1439795_at   | Gpr64         | 1.51 | 1.82E-02 |
| 1419483_at   | C3ar1         | 3.33 | 1.83E-02 |
| 1419030_at   | Ero1l         | 1.52 | 1.84E-02 |
| 1440865_at   | Ifitm6        | 1.66 | 1.85E-02 |
| 1419627_s_at | Clec4n        | 3.30 | 1.86E-02 |
| 1427910_at   | Cst6          | 1.50 | 1.87E-02 |
| 1434025_at   | NA            | 1.58 | 1.88E-02 |
| 1436473_at   | Zfp248        | 1.51 | 1.88E-02 |
| 1449514_at   | Grk5          | 1.65 | 1.88E-02 |
| 1455291_s_at | Znrf2         | 1.70 | 1.89E-02 |
| 1439345_at   | Gpnmb         | 1.67 | 1.89E-02 |
| 1424793_a_at | Pbp2          | 1.54 | 1.89E-02 |
| 1424351_at   | Wfdc2         | 1.74 | 1.90E-02 |
| 1434877_at   | Nptx1         | 2.27 | 1.90E-02 |
| 1418933_at   | Slc1a6        | 1.62 | 1.90E-02 |
| 1435554_at   | Tmcc3         | 1.53 | 1.90E-02 |
| 1420343_at   | Gzmd          | 2.80 | 1.91E-02 |
| 1422155_at   | Hist2h3c2     | 1.71 | 1.92E-02 |
| 1425985_s_at | Masp1         | 1.65 | 1.93E-02 |
| 1423570_at   | Abcg1         | 2.22 | 1.94E-02 |
| 1448995_at   | Pf4           | 2.43 | 1.94E-02 |
| 1449324_at   | Ero1l         | 1.58 | 1.97E-02 |
| 1415897_a_at | Mgst1         | 1.82 | 1.98E-02 |
| 1416236_a_at | Mpzl2         | 1.79 | 1.99E-02 |
| 1424263_at   | Aif1l         | 1.55 | 1.99E-02 |
| 1419728_at   | Cxcl5         | 5.51 | 1.99E-02 |
| 1456858_at   | Gpr149        | 1.97 | 1.99E-02 |



|              |          |      |          |
|--------------|----------|------|----------|
| 1436838_x_at | Cotl1    | 1.52 | 1.99E-02 |
| 1416871_at   | Adam8    | 3.63 | 2.02E-02 |
| 1455737_at   | Ppm1h    | 2.06 | 2.02E-02 |
| 1434272_at   | Cpeb2    | 1.53 | 2.06E-02 |
| 1421262_at   | Lipg     | 1.60 | 2.07E-02 |
| 1451991_at   | Epha7    | 1.53 | 2.07E-02 |
| 1421326_at   | Csf2rb   | 1.66 | 2.07E-02 |
| 1435477_s_at | Fcgr2b   | 3.03 | 2.07E-02 |
| 1451716_at   | Mafb     | 2.06 | 2.08E-02 |
| 1438160_x_at | Slco4a1  | 1.94 | 2.10E-02 |
| 1418253_a_at | Hspa4l   | 1.53 | 2.11E-02 |
| 1435343_at   | Dock10   | 1.85 | 2.16E-02 |
| 1422875_at   | Cd84     | 3.02 | 2.16E-02 |
| 1450188_s_at | Lipg     | 1.60 | 2.17E-02 |
| 1420344_x_at | Gzmd     | 2.77 | 2.18E-02 |
| 1421792_s_at | Trem2    | 2.32 | 2.19E-02 |
| 1425434_a_at | Msr1     | 2.03 | 2.20E-02 |
| 1416203_at   | Aqp1     | 2.09 | 2.22E-02 |
| 1421408_at   | Igsf6    | 1.95 | 2.24E-02 |
| 1449641_at   | Adk      | 1.51 | 2.26E-02 |
| 1419883_s_at | Atp6v1b2 | 1.51 | 2.26E-02 |
| 1451941_a_at | Fcgr2b   | 2.13 | 2.30E-02 |
| 1420699_at   | Clec7a   | 1.85 | 2.31E-02 |
| 1449025_at   | Ifit3    | 1.55 | 2.33E-02 |
| 1455679_at   | Obfc2a   | 1.64 | 2.35E-02 |
| 1417960_at   | Cpeb1    | 1.91 | 2.36E-02 |
| 1449670_x_at | NA       | 1.62 | 2.36E-02 |
| 1423477_at   | Zic1     | 1.54 | 2.38E-02 |
| 1452406_x_at | Erdr1    | 2.31 | 2.38E-02 |
| 1437811_x_at | NA       | 1.52 | 2.43E-02 |
| 1448318_at   | Plin2    | 1.56 | 2.50E-02 |
| 1426930_at   | Brunol4  | 1.63 | 2.52E-02 |
| 1448025_at   | NA       | 3.85 | 2.64E-02 |
| 1419132_at   | Tlr2     | 1.57 | 2.71E-02 |
| 1416371_at   | Apod     | 1.54 | 2.72E-02 |
| 1448749_at   | Plek     | 2.64 | 2.75E-02 |
| 1424229_at   | Dyrk3    | 1.73 | 2.80E-02 |
| 1456321_at   | Nipal1   | 2.12 | 2.88E-02 |
| 1451308_at   | Elovl4   | 1.89 | 2.89E-02 |
| 1457644_s_at | Cxcl1    | 2.65 | 2.91E-02 |
| 1448748_at   | Plek     | 3.49 | 2.92E-02 |
| 1449317_at   | NA       | 1.57 | 2.93E-02 |
| 1439956_at   | Ms4a6b   | 1.58 | 2.93E-02 |
| 1449402_at   | Chst7    | 1.59 | 2.94E-02 |
| 1420930_s_at | Ctnnal1  | 1.62 | 2.94E-02 |
| 1428414_at   | NA       | 1.59 | 2.98E-02 |
| 1422243_at   | Fgf7     | 1.65 | 2.98E-02 |
| 1419592_at   | Unc5c    | 1.59 | 3.01E-02 |
| 1455785_at   | Kcna1    | 1.50 | 3.02E-02 |
| 1460521_a_at | Obfc2a   | 1.86 | 3.08E-02 |
| 1438210_at   | Gpr149   | 1.78 | 3.11E-02 |
| 1419493_a_at | Tpd52    | 1.56 | 3.12E-02 |
| 1422062_at   | Msr1     | 2.31 | 3.14E-02 |
| 1455337_at   | Fgd4     | 1.58 | 3.17E-02 |
| 1437614_x_at | Zdhhc14  | 1.58 | 3.18E-02 |

|              |                |      |          |
|--------------|----------------|------|----------|
| 1443579_s_at | Depdc6         | 1.63 | 3.22E-02 |
| 1424965_at   | Lpxn           | 2.92 | 3.23E-02 |
| 1435137_s_at | NA             | 1.51 | 3.25E-02 |
| 1450430_at   | Mrc1           | 2.14 | 3.25E-02 |
| 1448330_at   | Gstm1          | 1.57 | 3.30E-02 |
| 1419589_at   | Cd93           | 1.55 | 3.30E-02 |
| 1416635_at   | Smpdl3a        | 1.86 | 3.35E-02 |
| 1450808_at   | Fpr1           | 2.05 | 3.39E-02 |
| 1457753_at   | Tlr13          | 1.80 | 3.41E-02 |
| 1427301_at   | Cd48           | 2.55 | 3.41E-02 |
| 1455803_at   | Slco4a1        | 1.80 | 3.41E-02 |
| 1449164_at   | Cd68           | 3.22 | 3.43E-02 |
| 1449222_at   | Ebi3           | 1.66 | 3.43E-02 |
| 1448617_at   | Cd53           | 3.06 | 3.45E-02 |
| 1423547_at   | Lyz2           | 3.99 | 3.69E-02 |
| 1422645_at   | Hfe            | 1.52 | 3.84E-02 |
| 1448328_at   | Sh3bp2         | 1.60 | 3.85E-02 |
| 1433963_a_at | Fermt3         | 2.16 | 3.85E-02 |
| 1424683_at   | Fam134b        | 2.23 | 3.88E-02 |
| 1434470_at   | Syt13          | 1.87 | 3.90E-02 |
| 1460466_at   | 1700047117Rik1 | 1.64 | 3.94E-02 |
| 1439965_at   | NA             | 1.67 | 3.94E-02 |
| 1428547_at   | Nt5e           | 2.47 | 3.95E-02 |
| 1422040_at   | Sema7a         | 1.50 | 3.95E-02 |
| 1419561_at   | Ccl3           | 2.52 | 3.97E-02 |
| 1417491_at   | Ctsb           | 1.61 | 4.00E-02 |
| 1418172_at   | Hebp1          | 1.53 | 4.03E-02 |
| 1451860_a_at | Trim30         | 2.47 | 4.05E-02 |
| 1423140_at   | Lipa           | 1.51 | 4.06E-02 |
| 1451174_at   | Lrrc33         | 1.99 | 4.09E-02 |
| 1421492_at   | Hpgds          | 1.62 | 4.14E-02 |
| 1416416_x_at | Gstm1          | 1.54 | 4.15E-02 |
| 1434582_at   | Erc2           | 1.57 | 4.16E-02 |
| 1419675_at   | Ngf            | 1.81 | 4.22E-02 |
| 1450567_a_at | Col2a1         | 2.20 | 4.25E-02 |
| 1419186_a_at | St8sia4        | 1.95 | 4.37E-02 |
| 1422869_at   | Mertk          | 1.65 | 4.47E-02 |
| 1422823_at   | NA             | 1.61 | 4.53E-02 |
| 1451755_a_at | Apobec1        | 1.82 | 4.57E-02 |
| 1434067_at   | A1662270       | 2.07 | 4.62E-02 |
| 1429524_at   | Myo1f          | 2.52 | 4.64E-02 |
| 1428643_at   | Mgat5          | 1.55 | 4.68E-02 |
| 1426505_at   | NA             | 1.85 | 4.70E-02 |
| 1423152_at   | Vapb           | 1.54 | 4.70E-02 |
| 1422191_at   | Cd200r1        | 1.66 | 4.72E-02 |
| 1418046_at   | Nap1l2         | 1.53 | 4.72E-02 |
| 1456684_at   | Tmem74         | 1.55 | 4.78E-02 |
| 1448620_at   | Fcgr3          | 3.08 | 4.79E-02 |
| 1429525_s_at | Myo1f          | 1.69 | 4.81E-02 |
| 1448061_at   | Msr1           | 2.89 | 4.84E-02 |
| 1426284_at   | Krt20          | 1.86 | 4.86E-02 |
| 1420715_a_at | Pparg          | 1.56 | 4.87E-02 |
| 1442798_x_at | Hk3            | 2.03 | 4.88E-02 |
| 1423522_at   | NA             | 2.24 | 4.89E-02 |
| 1428786_at   | Nckap1l        | 1.73 | 4.89E-02 |

1459903\_at

Sema7a

2.60

4.96E-02

Table S1c. *Cebpb*<sup>-/-</sup>/Ras<sup>V12</sup> vs. WT/Ras<sup>V12</sup> MEFs (650 probes)

| ProbeID      | GeneSymbol | Fold Change | p-value  |
|--------------|------------|-------------|----------|
| 1418901_at   | Cebpb      | -66.31      | 1.14E-09 |
| 1460197_a_at | Steap4     | -35.53      | 1.74E-09 |
| 1416564_at   | Sox7       | -13.37      | 3.72E-09 |
| 1450826_a_at | Saa3       | -70.87      | 3.72E-09 |
| 1427747_a_at | Lcn2       | -46.97      | 1.53E-08 |
| 1450538_s_at | NA         | -13.63      | 2.37E-08 |
| 1427844_a_at | Cebpb      | -49.32      | 2.37E-08 |
| 1418422_at   | Serpib9g   | -12.86      | 2.55E-08 |
| 1421473_at   | Il1a       | -19.02      | 2.10E-07 |
| 1425603_at   | Tmem176a   | -7.23       | 2.97E-07 |
| 1449195_s_at | Cxcl16     | -7.03       | 3.02E-07 |
| 1441811_x_at | Tmem176a   | -5.23       | 3.24E-07 |
| 1421207_at   | Lif        | -4.61       | 3.24E-07 |
| 1418004_a_at | Tmem176b   | -5.32       | 3.24E-07 |
| 1450297_at   | Il6        | -18.94      | 4.10E-07 |
| 1423909_at   | Tmem176a   | -5.84       | 4.10E-07 |
| 1423954_at   | C3         | -11.01      | 4.11E-07 |
| 1417256_at   | Mmp13      | -23.34      | 5.46E-07 |
| 1425829_a_at | Steap4     | -6.56       | 6.15E-07 |
| 1418423_s_at | NA         | -5.34       | 7.01E-07 |
| 1427429_at   | Csf2       | -9.84       | 7.56E-07 |
| 1453282_at   | Cxadr      | -3.57       | 8.99E-07 |
| 1421228_at   | Ccl7       | -4.27       | 1.16E-06 |
| 1449984_at   | Cxcl2      | -13.83      | 1.16E-06 |
| 1422240_s_at | Sprr2h     | -11.70      | 1.18E-06 |
| 1448734_at   | Cp         | -7.86       | 1.18E-06 |
| 1417494_a_at | Cp         | -6.58       | 2.35E-06 |
| 1417496_at   | Cp         | -6.13       | 2.91E-06 |
| 1418847_at   | Arg2       | -5.52       | 3.33E-06 |
| 1417273_at   | Pdk4       | -4.28       | 4.16E-06 |
| 1449965_at   | Mcpt8      | -2.88       | 4.37E-06 |
| 1422352_at   | Mcpt1      | -7.62       | 4.62E-06 |
| 1427348_at   | Zc3h12a    | -2.76       | 5.32E-06 |
| 1422573_at   | Ampd3      | -3.03       | 5.32E-06 |
| 1450160_at   | Lif        | -3.62       | 5.32E-06 |
| 1451006_at   | Xdh        | -3.17       | 5.32E-06 |
| 1433909_at   | Syt17      | -3.56       | 5.47E-06 |
| 1417813_at   | lkbke      | -3.07       | 5.79E-06 |
| 1417495_x_at | Cp         | -5.29       | 5.79E-06 |
| 1418133_at   | Bcl3       | -2.94       | 6.17E-06 |
| 1420394_s_at | NA         | -5.21       | 6.74E-06 |
| 1415897_a_at | Mgst1      | -2.85       | 8.21E-06 |
| 1455393_at   | Cp         | -4.18       | 8.29E-06 |
| 1422029_at   | Ccl20      | -5.42       | 9.90E-06 |
| 1419208_at   | Map3k8     | -2.46       | 1.16E-05 |
| 1453092_at   | Crct1      | -4.64       | 1.21E-05 |
| 1448871_at   | Mapk13     | -3.02       | 1.35E-05 |
| 1422955_at   | Syt17      | -3.40       | 1.47E-05 |
| 1441855_x_at | Cxcl1      | -3.66       | 1.57E-05 |
| 1448377_at   | Slpi       | -2.49       | 1.60E-05 |

|              |               |        |          |
|--------------|---------------|--------|----------|
| 1421227_at   | NA            | -3.45  | 1.63E-05 |
| 1417023_a_at | Fabp4         | -3.07  | 1.63E-05 |
| 1419080_at   | Gdnf          | -2.54  | 1.63E-05 |
| 1456248_at   | NA            | -3.47  | 1.63E-05 |
| 1422997_s_at | NA            | -2.42  | 1.79E-05 |
| 1449227_at   | Ch25h         | -3.54  | 1.89E-05 |
| 1439478_at   | Acot2         | -2.43  | 1.89E-05 |
| 1417633_at   | Sod3          | -4.61  | 2.00E-05 |
| 1424265_at   | Npl           | -3.35  | 2.01E-05 |
| 1448306_at   | Nfkbia        | -2.62  | 2.12E-05 |
| 1438773_at   | Steap2        | -3.67  | 2.23E-05 |
| 1457644_s_at | Cxcl1         | -14.50 | 2.23E-05 |
| 1449731_s_at | Nfkbia        | -2.64  | 2.50E-05 |
| 1416239_at   | Ass1          | -2.54  | 2.54E-05 |
| 1449949_a_at | Cxadr         | -2.08  | 2.59E-05 |
| 1448263_a_at | Cndp2         | -2.10  | 2.66E-05 |
| 1418248_at   | Gla           | -2.43  | 2.71E-05 |
| 1420089_at   | Nfkbia        | -2.47  | 2.71E-05 |
| 1448303_at   | Gpnmb         | -2.79  | 2.77E-05 |
| 1444290_at   | Steap2        | -4.07  | 2.83E-05 |
| 1424595_at   | F11r          | -2.69  | 2.83E-05 |
| 1449310_at   | Ptger2        | -2.50  | 2.83E-05 |
| 1449356_at   | Asb5          | -6.54  | 2.85E-05 |
| 1426911_at   | Dsc2          | -2.54  | 2.96E-05 |
| 1422996_at   | Acot2         | -2.34  | 2.96E-05 |
| 1434909_at   | Rragd         | -2.19  | 3.19E-05 |
| 1420380_at   | Ccl2          | -2.35  | 3.31E-05 |
| 1452418_at   | 1200016E24Rik | -2.94  | 3.56E-05 |
| 1450171_x_at | Gzme          | -3.56  | 3.65E-05 |
| 1418718_at   | Cxcl16        | -2.50  | 4.08E-05 |
| 1418936_at   | Maff          | -2.02  | 4.11E-05 |
| 1419209_at   | Cxcl1         | -19.92 | 4.11E-05 |
| 1426818_at   | Arrdc4        | -2.99  | 4.11E-05 |
| 1442187_at   | Bdkrb2        | -6.26  | 4.19E-05 |
| 1438157_s_at | Nfkbia        | -2.26  | 4.29E-05 |
| 1460177_at   | Cndp2         | -2.04  | 4.56E-05 |
| 1455161_at   | AI504432      | -2.78  | 4.56E-05 |
| 1438841_s_at | Arg2          | -3.94  | 4.56E-05 |
| 1452614_at   | Bcl2l15       | -5.76  | 4.60E-05 |
| 1455859_at   | A330021E22Rik | -2.30  | 4.61E-05 |
| 1446071_at   | Steap2        | -3.80  | 4.61E-05 |
| 1449065_at   | NA            | -3.14  | 4.87E-05 |
| 1433720_s_at | Chchd10       | -2.50  | 5.24E-05 |
| 1442359_at   | Steap2        | -2.95  | 5.41E-05 |
| 1428187_at   | Cd47          | -2.28  | 5.43E-05 |
| 1456981_at   | Tmc7          | -2.06  | 5.49E-05 |
| 1419175_a_at | Btn1a1        | -2.80  | 5.87E-05 |
| 1436990_s_at | Chchd10       | -2.78  | 6.42E-05 |
| 1428942_at   | Mt2           | -2.47  | 6.42E-05 |
| 1434302_at   | Raph1         | -1.96  | 6.98E-05 |
| 1449006_at   | Gla           | -2.59  | 6.98E-05 |
| 1434537_at   | Slco3a1       | -3.22  | 7.00E-05 |
| 1436003_at   | Vcam1         | -7.10  | 7.02E-05 |
| 1419394_s_at | S100a8        | -10.75 | 7.22E-05 |
| 1456064_at   | NA            | -2.62  | 7.22E-05 |

|              |          |       |          |
|--------------|----------|-------|----------|
| 1428919_at   | Fgfr1op  | -2.00 | 7.23E-05 |
| 1437245_at   | Tmem154  | -2.12 | 7.54E-05 |
| 1416593_at   | Glrx     | -2.07 | 7.71E-05 |
| 1419647_a_at | Ier3     | -2.07 | 8.10E-05 |
| 1448529_at   | Thbd     | -1.85 | 8.48E-05 |
| 1417263_at   | Ptgs2    | -2.30 | 8.50E-05 |
| 1456212_x_at | Socs3    | -1.95 | 8.56E-05 |
| 1455221_at   | Abcg1    | -1.95 | 8.56E-05 |
| 1422177_at   | Il13ra2  | -2.02 | 8.56E-05 |
| 1438097_at   | Rab20    | -2.05 | 8.56E-05 |
| 1419554_at   | Cd47     | -2.21 | 8.56E-05 |
| 1451263_a_at | Fabp4    | -2.49 | 8.60E-05 |
| 1419136_at   | Akr1c18  | -4.63 | 8.73E-05 |
| 1427321_s_at | Cxadr    | -2.77 | 8.90E-05 |
| 1448239_at   | Hmox1    | -2.49 | 9.15E-05 |
| 1451287_s_at | Aif1l    | -2.14 | 9.59E-05 |
| 1438160_x_at | Slco4a1  | -2.83 | 9.59E-05 |
| 1425336_x_at | H2-K1    | -2.25 | 9.75E-05 |
| 1455899_x_at | Socs3    | -1.95 | 9.81E-05 |
| 1424683_at   | Fam134b  | -2.10 | 1.04E-04 |
| 1448792_a_at | Cyp2f2   | -2.12 | 1.07E-04 |
| 1418666_at   | Ptx3     | -4.11 | 1.08E-04 |
| 1434303_at   | Raph1    | -1.88 | 1.10E-04 |
| 1419832_s_at | Acpp     | -4.91 | 1.11E-04 |
| 1425702_a_at | Enpp5    | -1.94 | 1.14E-04 |
| 1418493_a_at | Snca     | -2.40 | 1.14E-04 |
| 1424948_x_at | NA       | -2.28 | 1.16E-04 |
| 1435596_at   | Pion     | -2.02 | 1.18E-04 |
| 1442048_at   | Rnf11    | -1.84 | 1.21E-04 |
| 1419687_at   | Macrocl1 | -1.89 | 1.21E-04 |
| 1417045_at   | Bid      | -1.83 | 1.22E-04 |
| 1435040_at   | Irak3    | -2.04 | 1.22E-04 |
| 1422474_at   | Pde4b    | -2.27 | 1.23E-04 |
| 1458370_at   | Bmp2k    | -2.21 | 1.24E-04 |
| 1420088_at   | Nfkbia   | -1.91 | 1.26E-04 |
| 1436853_a_at | Snca     | -2.51 | 1.38E-04 |
| 1416592_at   | Glrx     | -2.00 | 1.40E-04 |
| 1423233_at   | Cebpd    | -1.99 | 1.45E-04 |
| 1426441_at   | Slc11a2  | -2.30 | 1.52E-04 |
| 1437197_at   | Sorbs2   | -2.26 | 1.54E-04 |
| 1427364_a_at | Odc1     | -2.30 | 1.61E-04 |
| 1418030_at   | Slco3a1  | -3.22 | 1.71E-04 |
| 1448918_at   | Slco3a1  | -2.92 | 1.72E-04 |
| 1416401_at   | Cd82     | -1.83 | 1.80E-04 |
| 1460569_x_at | Cldn3    | -1.76 | 1.87E-04 |
| 1427515_at   | Pion     | -1.89 | 1.87E-04 |
| 1417703_at   | Pvrl2    | -2.20 | 1.93E-04 |
| 1451644_a_at | NA       | -2.55 | 1.96E-04 |
| 1449507_a_at | Cd47     | -2.06 | 1.97E-04 |
| 1426404_a_at | Rnf11    | -1.73 | 1.97E-04 |
| 1434548_at   | Serinc3  | -1.74 | 1.99E-04 |
| 1424938_at   | Steap1   | -2.21 | 2.07E-04 |
| 1441709_at   | Slc11a2  | -2.10 | 2.10E-04 |
| 1424041_s_at | NA       | -2.06 | 2.12E-04 |
| 1452141_a_at | Sepp1    | -2.16 | 2.22E-04 |

|              |         |       |          |
|--------------|---------|-------|----------|
| 1448228_at   | Lox     | -2.22 | 2.23E-04 |
| 1453943_a_at | Acpp    | -4.64 | 2.25E-04 |
| 1434559_at   | Stx3    | -1.82 | 2.25E-04 |
| 1418872_at   | Abcb1b  | -1.77 | 2.33E-04 |
| 1458236_at   | NA      | -3.29 | 2.34E-04 |
| 1425154_a_at | Csf1    | -2.78 | 2.36E-04 |
| 1419012_at   | Zfpm2   | -1.87 | 2.37E-04 |
| 1450165_at   | Slfn2   | -2.41 | 2.40E-04 |
| 1425706_a_at | Ddb2    | -1.68 | 2.40E-04 |
| 1418076_at   | St14    | -1.65 | 2.47E-04 |
| 1427409_at   | NA      | -1.73 | 2.54E-04 |
| 1449591_at   | Casp4   | -2.29 | 2.56E-04 |
| 1420654_a_at | Gbe1    | -1.82 | 2.56E-04 |
| 1434553_at   | Tmem56  | -2.69 | 2.61E-04 |
| 1452058_a_at | Rnf11   | -1.72 | 2.73E-04 |
| 1434144_s_at | Wdyhv1  | -2.06 | 2.76E-04 |
| 1417749_a_at | Tjp1    | -1.72 | 2.78E-04 |
| 1437651_a_at | Dtnb    | -1.70 | 2.78E-04 |
| 1426324_at   | NA      | -1.89 | 2.78E-04 |
| 1437419_at   | Bmp2k   | -2.18 | 2.79E-04 |
| 1428636_at   | Steap2  | -2.66 | 2.80E-04 |
| 1427746_x_at | H2-K1   | -2.14 | 2.83E-04 |
| 1423414_at   | Ptgs1   | -1.97 | 2.94E-04 |
| 1432489_a_at | Wdyhv1  | -2.38 | 2.95E-04 |
| 1451701_x_at | Cldn3   | -2.09 | 2.98E-04 |
| 1438405_at   | Fgf7    | -2.05 | 2.99E-04 |
| 1418990_at   | Ms4a4d  | -4.02 | 3.02E-04 |
| 1455607_at   | Rspo3   | -4.11 | 3.06E-04 |
| 1422473_at   | Pde4b   | -2.26 | 3.06E-04 |
| 1448532_at   | Prl8a9  | -8.57 | 3.07E-04 |
| 1455803_at   | Slco4a1 | -2.34 | 3.07E-04 |
| 1430997_at   | Cd47    | -2.26 | 3.07E-04 |
| 1433965_at   | Atp8a1  | -1.65 | 3.13E-04 |
| 1419588_at   | Spag1   | -1.75 | 3.13E-04 |
| 1438968_x_at | Spint2  | -2.44 | 3.16E-04 |
| 1426405_at   | Rnf11   | -1.83 | 3.16E-04 |
| 1429352_at   | Mocos   | -1.74 | 3.20E-04 |
| 1419431_at   | Ereg    | -1.69 | 3.28E-04 |
| 1441975_at   | Acpp    | -2.15 | 3.30E-04 |
| 1424077_at   | Gdpd1   | -1.61 | 3.59E-04 |
| 1449449_at   | Ptges   | -1.95 | 3.60E-04 |
| 1449324_at   | Ero1l   | -1.65 | 3.65E-04 |
| 1419427_at   | Csf3    | -2.53 | 3.68E-04 |
| 1451683_x_at | NA      | -1.83 | 3.79E-04 |
| 1446894_at   | NA      | -3.06 | 3.97E-04 |
| 1451935_a_at | Spint2  | -2.00 | 4.02E-04 |
| 1435857_s_at | Aplp1   | -1.78 | 4.02E-04 |
| 1424697_at   | Dtwd1   | -1.66 | 4.05E-04 |
| 1422243_at   | Fgf7    | -2.16 | 4.06E-04 |
| 1424076_at   | Gdpd1   | -1.64 | 4.11E-04 |
| 1449314_at   | Zfpm2   | -1.83 | 4.11E-04 |
| 1417516_at   | Ddit3   | -1.60 | 4.11E-04 |
| 1425155_x_at | Csf1    | -3.27 | 4.18E-04 |
| 1422470_at   | Bnip3   | -1.60 | 4.22E-04 |
| 1427086_at   | Slit3   | -2.32 | 4.23E-04 |

|              |               |       |          |
|--------------|---------------|-------|----------|
| 1441305_at   | Nedd4l        | -1.69 | 4.50E-04 |
| 1424923_at   | Serpina3g     | -2.03 | 4.55E-04 |
| 1434354_at   | Maob          | -2.51 | 4.65E-04 |
| 1455377_at   | Ttll7         | -1.66 | 4.68E-04 |
| 1442226_at   | Sema3e        | -4.31 | 4.73E-04 |
| 1455197_at   | Rnd1          | -2.57 | 4.91E-04 |
| 1423519_at   | Fam108c       | -1.59 | 4.95E-04 |
| 1453119_at   | Otud1         | -1.77 | 4.98E-04 |
| 1425536_at   | Stx3          | -1.70 | 4.98E-04 |
| 1420741_x_at | Lce1i         | -2.21 | 5.06E-04 |
| 1419132_at   | Tlr2          | -1.77 | 5.06E-04 |
| 1419658_at   | NA            | -2.58 | 5.06E-04 |
| 1451323_at   | Zfp7          | -1.69 | 5.07E-04 |
| 1425754_a_at | Btn1a1        | -1.95 | 5.12E-04 |
| 1419609_at   | Ccr1          | -2.55 | 5.15E-04 |
| 1449450_at   | Ptges         | -1.71 | 5.24E-04 |
| 1460232_s_at | NA            | -2.51 | 5.27E-04 |
| 1444796_at   | C76876        | -1.62 | 5.32E-04 |
| 1448318_at   | Plin2         | -1.80 | 5.32E-04 |
| 1417856_at   | Relb          | -1.76 | 5.39E-04 |
| 1451824_at   | Btn1a1        | -2.33 | 5.50E-04 |
| 1424250_a_at | Arhgef3       | -2.20 | 5.50E-04 |
| 1452078_a_at | Slc11a2       | -1.61 | 5.50E-04 |
| 1449773_s_at | Gadd45b       | -1.68 | 5.63E-04 |
| 1436054_at   | Khnyh         | -1.65 | 5.70E-04 |
| 1456156_at   | Lepr          | -2.62 | 5.70E-04 |
| 1448735_at   | Cp            | -2.35 | 5.72E-04 |
| 1446838_at   | Atad1         | -1.59 | 5.76E-04 |
| 1452296_at   | Slit3         | -2.09 | 5.76E-04 |
| 1419722_at   | Klk8          | -1.95 | 5.88E-04 |
| 1418949_at   | Gdf15         | -1.66 | 5.90E-04 |
| 1438910_a_at | Stom          | -1.75 | 5.91E-04 |
| 1421304_at   | Klra2         | -1.76 | 6.05E-04 |
| 1436719_at   | Slc35f1       | -1.75 | 6.05E-04 |
| 1417009_at   | C1ra          | -1.68 | 6.05E-04 |
| 1448728_a_at | Nfkbiz        | -3.93 | 6.05E-04 |
| 1437581_at   | Zfp800        | -1.66 | 6.05E-04 |
| 1436448_a_at | Ptgs1         | -2.30 | 6.08E-04 |
| 1419400_at   | Mttp          | -1.58 | 6.23E-04 |
| 1435133_at   | Ugcg          | -1.66 | 6.36E-04 |
| 1437284_at   | Fzd1          | -1.72 | 6.36E-04 |
| 1449153_at   | Mmp12         | -2.03 | 6.38E-04 |
| 1439766_x_at | Vegfc         | -4.15 | 6.38E-04 |
| 1426926_at   | Plcg2         | -1.64 | 6.46E-04 |
| 1424359_at   | Oplah         | -1.58 | 6.46E-04 |
| 1419097_a_at | Stom          | -1.68 | 6.60E-04 |
| 1435872_at   | Pim1          | -1.76 | 6.60E-04 |
| 1435748_at   | Gda           | -2.91 | 6.62E-04 |
| 1450505_a_at | Fam134b       | -1.98 | 6.67E-04 |
| 1419717_at   | Sema3e        | -4.07 | 6.67E-04 |
| 1449366_at   | Mmp8          | -3.59 | 6.67E-04 |
| 1425906_a_at | Sema3e        | -4.69 | 6.76E-04 |
| 1419309_at   | Pdpm          | -1.61 | 6.84E-04 |
| 1455602_x_at | 1110028C15Rik | -1.64 | 6.86E-04 |
| 1437101_at   | Lats2         | -1.56 | 6.87E-04 |



|              |               |       |          |
|--------------|---------------|-------|----------|
| 1450744_at   | Ell2          | -1.53 | 6.88E-04 |
| 1436197_at   | Cdc42bpg      | -1.60 | 6.89E-04 |
| 1439630_x_at | Sbsn          | -1.95 | 6.96E-04 |
| 1438761_a_at | NA            | -1.66 | 6.99E-04 |
| 1433454_at   | Abtb2         | -1.59 | 7.05E-04 |
| 1436480_at   | Dpp7          | -1.55 | 7.07E-04 |
| 1457440_at   | Sstr4         | -1.65 | 7.09E-04 |
| 1452387_a_at | Amotl2        | -1.70 | 7.16E-04 |
| 1425525_a_at | P2rx4         | -1.54 | 7.22E-04 |
| 1425893_a_at | Fhit          | -1.64 | 7.32E-04 |
| 1416121_at   | Lox           | -2.12 | 7.35E-04 |
| 1451526_at   | Arhgap12      | -1.53 | 7.38E-04 |
| 1427673_a_at | Sema3e        | -4.56 | 7.43E-04 |
| 1419473_a_at | Cck           | -5.23 | 7.48E-04 |
| 1447839_x_at | Adm           | -1.97 | 7.54E-04 |
| 1438030_at   | Rasgrp3       | -1.73 | 7.59E-04 |
| 1460220_a_at | Csf1          | -1.90 | 7.66E-04 |
| 1435680_a_at | Dpp7          | -1.58 | 7.68E-04 |
| 1439747_at   | Ptges         | -1.68 | 7.74E-04 |
| 1449875_s_at | NA            | -1.59 | 7.79E-04 |
| 1443688_at   | Zfp599        | -1.68 | 7.84E-04 |
| 1427912_at   | Cbr3          | -1.70 | 7.92E-04 |
| 1429987_at   | 9930013L23Rik | -2.59 | 7.98E-04 |
| 1422222_at   | Ivl           | -3.03 | 8.03E-04 |
| 1440353_at   | Ntf5          | -1.52 | 8.32E-04 |
| 1455299_at   | Vgll3         | -1.62 | 8.69E-04 |
| 1417816_s_at | Serinc3       | -1.56 | 8.79E-04 |
| 1437711_x_at | NA            | -1.62 | 9.10E-04 |
| 1438035_at   | Fam82a1       | -1.71 | 9.14E-04 |
| 1424308_at   | Slc24a3       | -2.12 | 9.16E-04 |
| 1420603_s_at | NA            | -1.76 | 9.25E-04 |
| 1416368_at   | Gsta4         | -1.69 | 9.45E-04 |
| 1430135_at   | Dnase2a       | -1.91 | 9.55E-04 |
| 1424263_at   | Aif1l         | -1.56 | 9.93E-04 |
| 1425530_a_at | Stx3          | -1.60 | 1.00E-03 |
| 1436345_at   | 5730559C18Rik | -1.58 | 1.00E-03 |
| 1426604_at   | Rnasel        | -1.57 | 1.00E-03 |
| 1451314_a_at | Vcam1         | -3.00 | 1.00E-03 |
| 1440739_at   | Vegfc         | -4.66 | 1.01E-03 |
| 1434322_at   | Micall2       | -1.77 | 1.01E-03 |
| 1418283_at   | Cldn4         | -1.81 | 1.02E-03 |
| 1433759_at   | Dpy19l1       | -1.54 | 1.02E-03 |
| 1438036_x_at | Fam82a1       | -1.70 | 1.02E-03 |
| 1439181_at   | Zfp658        | -1.83 | 1.03E-03 |
| 1415948_at   | Creg1         | -1.52 | 1.03E-03 |
| 1453711_at   | Rspo4         | -1.71 | 1.04E-03 |
| 1436680_s_at | Ddb2          | -1.54 | 1.04E-03 |
| 1419417_at   | Vegfc         | -4.94 | 1.05E-03 |
| 1437044_a_at | Gba           | -1.54 | 1.05E-03 |
| 1425644_at   | Lepr          | -2.16 | 1.05E-03 |
| 1437119_at   | Ern1          | -1.53 | 1.08E-03 |
| 1415996_at   | Txnip         | -1.62 | 1.09E-03 |
| 1449032_at   | Prl2a1        | -1.74 | 1.10E-03 |
| 1440796_at   | A330021E22Rik | -1.83 | 1.12E-03 |
| 1434670_at   | Kif5a         | -1.61 | 1.12E-03 |

|              |               |       |          |
|--------------|---------------|-------|----------|
| 1431786_s_at | 1190003J15Rik | -1.80 | 1.16E-03 |
| 1427005_at   | Plk2          | -1.51 | 1.19E-03 |
| 1416077_at   | Adm           | -1.95 | 1.19E-03 |
| 1425420_s_at | Lats2         | -1.64 | 1.19E-03 |
| 1448914_a_at | Csf1          | -2.19 | 1.20E-03 |
| 1460251_at   | Fas           | -1.62 | 1.22E-03 |
| 1436200_at   | Lonrf3        | -2.39 | 1.22E-03 |
| 1454685_at   | Gpr146        | -1.65 | 1.22E-03 |
| 1436303_at   | Mllt4         | -1.61 | 1.24E-03 |
| 1451532_s_at | Steap1        | -1.86 | 1.24E-03 |
| 1439878_at   | Ivl           | -3.94 | 1.24E-03 |
| 1435058_x_at | Stxbp3a       | -1.51 | 1.24E-03 |
| 1426930_at   | Brunol4       | -1.55 | 1.25E-03 |
| 1429396_at   | Atg16l2       | -1.57 | 1.25E-03 |
| 1451784_x_at | H2-D1         | -1.58 | 1.27E-03 |
| 1455617_at   | Lmbrd1        | -1.56 | 1.30E-03 |
| 1457571_at   | Zfp68         | -1.54 | 1.30E-03 |
| 1449585_at   | Il1rap        | -1.65 | 1.30E-03 |
| 1452837_at   | Lpin2         | -1.53 | 1.30E-03 |
| 1447361_at   | Al464196      | -1.74 | 1.31E-03 |
| 1417750_a_at | Slc25a37      | -1.58 | 1.33E-03 |
| 1459897_a_at | Sbsn          | -2.15 | 1.34E-03 |
| 1455345_at   | Phf15         | -1.55 | 1.35E-03 |
| 1424659_at   | Slit2         | -2.34 | 1.36E-03 |
| 1421267_a_at | Cited2        | -1.60 | 1.36E-03 |
| 1452823_at   | Gstk1         | -1.59 | 1.36E-03 |
| 1416576_at   | Socs3         | -1.68 | 1.37E-03 |
| 1451931_x_at | H2-L          | -1.59 | 1.39E-03 |
| 1422917_at   | Epha1         | -1.62 | 1.41E-03 |
| 1458299_s_at | Nfkbie        | -1.53 | 1.43E-03 |
| 1417483_at   | Nfkbiz        | -3.04 | 1.45E-03 |
| 1424289_at   | Osgin2        | -1.58 | 1.45E-03 |
| 1423570_at   | Abcg1         | -1.80 | 1.45E-03 |
| 1451525_at   | Arhgap12      | -1.53 | 1.49E-03 |
| 1450063_at   | NA            | -1.80 | 1.49E-03 |
| 1415899_at   | Junb          | -1.64 | 1.49E-03 |
| 1439833_at   | 41155         | -1.86 | 1.49E-03 |
| 1435744_at   | 6720401G13Rik | -1.63 | 1.49E-03 |
| 1417960_at   | Cpeb1         | -1.60 | 1.50E-03 |
| 1443714_at   | Cpped1        | -1.60 | 1.50E-03 |
| 1426225_at   | Rbp4          | -2.54 | 1.50E-03 |
| 1418714_at   | Dusp8         | -1.51 | 1.51E-03 |
| 1425545_x_at | NA            | -1.53 | 1.52E-03 |
| 1457686_at   | Sfrs17b       | -1.56 | 1.54E-03 |
| 1442700_at   | Pde4b         | -1.63 | 1.55E-03 |
| 1417001_a_at | D4Wsu53e      | -1.53 | 1.55E-03 |
| 1426440_at   | Dhrs7         | -1.56 | 1.55E-03 |
| 1427689_a_at | Tnip1         | -1.55 | 1.57E-03 |
| 1457832_at   | NA            | -1.55 | 1.59E-03 |
| 1422637_at   | Rassf5        | -1.65 | 1.60E-03 |
| 1419924_at   | Fnip1         | -1.53 | 1.60E-03 |
| 1428260_at   | Atl1          | -1.54 | 1.62E-03 |
| 1418983_at   | Inadl         | -1.63 | 1.63E-03 |
| 1440922_at   | 9130208D14Rik | -2.55 | 1.65E-03 |
| 1435120_at   | NA            | -1.56 | 1.66E-03 |

|              |               |       |          |
|--------------|---------------|-------|----------|
| 1421156_a_at | Dsc2          | -1.58 | 1.66E-03 |
| 1428357_at   | 2610019F03Rik | -1.59 | 1.68E-03 |
| 1434292_at   | Snhg11        | -1.79 | 1.69E-03 |
| 1426362_at   | Tmem144       | -1.53 | 1.69E-03 |
| 1438707_at   | NA            | -1.63 | 1.70E-03 |
| 1426151_a_at | Stx3          | -1.53 | 1.72E-03 |
| 1439349_at   | Sbno2         | -1.62 | 1.74E-03 |
| 1419537_at   | Tcfec         | -1.70 | 1.74E-03 |
| 1425546_a_at | Trf           | -3.70 | 1.75E-03 |
| 1425927_a_at | Atf5          | -1.51 | 1.78E-03 |
| 1420804_s_at | Clec4d        | -1.54 | 1.80E-03 |
| 1448560_at   | Bid           | -1.59 | 1.82E-03 |
| 1417161_at   | Cdk2ap2       | -1.51 | 1.89E-03 |
| 1435331_at   | Pyhin1        | -2.72 | 1.89E-03 |
| 1443861_at   | Cgnl1         | -1.68 | 1.91E-03 |
| 1442156_at   | E030030I06Rik | -1.75 | 1.99E-03 |
| 1424456_at   | Pvrl2         | -1.59 | 2.00E-03 |
| 1434945_at   | Lpcat2        | -1.59 | 2.00E-03 |
| 1450971_at   | Gadd45b       | -1.53 | 2.01E-03 |
| 1456778_at   | NA            | -2.35 | 2.01E-03 |
| 1435458_at   | Pim1          | -1.55 | 2.04E-03 |
| 1426526_s_at | Ovgp1         | -1.80 | 2.06E-03 |
| 1436479_a_at | Dpp7          | -1.51 | 2.09E-03 |
| 1454788_at   | NA            | -1.51 | 2.09E-03 |
| 1460009_at   | Ier5          | -1.57 | 2.10E-03 |
| 1422742_at   | Hivep1        | -1.54 | 2.17E-03 |
| 1449677_s_at | Tmem38b       | -1.55 | 2.18E-03 |
| 1433506_at   | Lrrc8d        | -1.59 | 2.20E-03 |
| 1436412_at   | NA            | -1.51 | 2.21E-03 |
| 1425681_a_at | Prnd          | -1.70 | 2.21E-03 |
| 1448847_at   | Serinc3       | -1.55 | 2.21E-03 |
| 1437724_x_at | Pitpnm1       | -1.57 | 2.27E-03 |
| 1421268_at   | Ugcg          | -1.51 | 2.27E-03 |
| 1429348_at   | Sema3c        | -1.53 | 2.28E-03 |
| 1424524_at   | Dram1         | -1.68 | 2.28E-03 |
| 1419045_at   | Slc25a23      | -1.58 | 2.30E-03 |
| 1422317_a_at | I11r11        | -1.59 | 2.30E-03 |
| 1417262_at   | Ptgs2         | -1.56 | 2.31E-03 |
| 1455885_at   | Amz1          | -1.51 | 2.31E-03 |
| 1426501_a_at | Tifa          | -1.59 | 2.31E-03 |
| 1419099_x_at | Stom          | -1.69 | 2.33E-03 |
| 1426887_at   | Nudt11        | -1.73 | 2.36E-03 |
| 1421103_at   | Bmp2k         | -1.58 | 2.38E-03 |
| 1450409_a_at | Slc48a1       | -1.58 | 2.41E-03 |
| 1419098_at   | Stom          | -1.65 | 2.43E-03 |
| 1450004_at   | Tslp          | -3.13 | 2.45E-03 |
| 1420774_a_at | 4930583H14Rik | -1.51 | 2.47E-03 |
| 1423597_at   | Atp8a1        | -1.78 | 2.49E-03 |
| 1448860_at   | Rem2          | -1.56 | 2.52E-03 |
| 1436996_x_at | Lyz1          | -1.78 | 2.65E-03 |
| 1425007_at   | Zfp566        | -1.52 | 2.65E-03 |
| 1418674_at   | Osmr          | -1.84 | 2.65E-03 |
| 1457697_at   | A330021E22Rik | -1.56 | 2.65E-03 |
| 1426619_at   | Aim2          | -1.77 | 2.67E-03 |
| 1423153_x_at | NA            | -1.81 | 2.69E-03 |

|              |               |       |          |
|--------------|---------------|-------|----------|
| 1435426_s_at | NA            | -1.66 | 2.71E-03 |
| 1440681_at   | Chrna7        | -2.24 | 2.72E-03 |
| 1423164_at   | NA            | -1.62 | 2.77E-03 |
| 1454867_at   | Mn1           | -1.89 | 2.77E-03 |
| 1460584_at   | Ppip5k1       | -1.52 | 2.79E-03 |
| 1448052_at   | Cgnl1         | -1.50 | 2.84E-03 |
| 1458920_at   | NA            | -1.53 | 2.84E-03 |
| 1417414_at   | 41155         | -1.76 | 2.90E-03 |
| 1429216_at   | Paqr3         | -1.53 | 2.91E-03 |
| 1418675_at   | Osmr          | -1.73 | 2.93E-03 |
| 1456545_at   | Il18rap       | -1.64 | 2.94E-03 |
| 1421117_at   | Dst           | -1.60 | 2.94E-03 |
| 1427405_s_at | Rab11fip5     | -1.53 | 2.97E-03 |
| 1438148_at   | Cxcl3         | -3.59 | 2.97E-03 |
| 1440234_at   | 1810012P15Rik | -1.50 | 2.99E-03 |
| 1447264_at   | Rab11fip1     | -1.59 | 2.99E-03 |
| 1419728_at   | Cxcl5         | -8.88 | 3.01E-03 |
| 1442599_at   | Slc12a9       | -1.50 | 3.07E-03 |
| 1422562_at   | Rrad          | -1.71 | 3.10E-03 |
| 1435462_at   | Plcxd2        | -1.76 | 3.12E-03 |
| 1446769_at   | Ttc39c        | -1.50 | 3.13E-03 |
| 1443870_at   | Abcc4         | -1.67 | 3.14E-03 |
| 1422638_s_at | Rassf5        | -1.50 | 3.17E-03 |
| 1416527_at   | Rab32         | -1.62 | 3.18E-03 |
| 1439255_s_at | NA            | -1.80 | 3.20E-03 |
| 1435836_at   | Pdk1          | -1.54 | 3.20E-03 |
| 1427932_s_at | NA            | -1.51 | 3.22E-03 |
| 1448260_at   | Uchl1         | -1.56 | 3.22E-03 |
| 1456599_at   | Nxt2          | -1.52 | 3.22E-03 |
| 1437366_at   | NA            | -1.64 | 3.28E-03 |
| 1416832_at   | Slc39a8       | -1.63 | 3.34E-03 |
| 1419532_at   | Il1r2         | -2.67 | 3.44E-03 |
| 1439284_at   | Epb4.1l5      | -1.56 | 3.48E-03 |
| 1450829_at   | Tnfaip3       | -1.81 | 3.48E-03 |
| 1457140_s_at | Rassf10       | -1.72 | 3.56E-03 |
| 1419691_at   | Camp          | -1.62 | 3.58E-03 |
| 1437098_x_at | Ttc30a2       | -1.53 | 3.59E-03 |
| 1433827_at   | Atp8a1        | -1.58 | 3.63E-03 |
| 1417220_at   | Fah           | -1.75 | 3.63E-03 |
| 1427604_a_at | Atp9a         | -1.50 | 3.66E-03 |
| 1434414_at   | Foxred2       | -1.52 | 3.66E-03 |
| 1435805_at   | Lin7a         | -1.59 | 3.68E-03 |
| 1448881_at   | Hp            | -2.36 | 3.73E-03 |
| 1429863_at   | Lonrf3        | -1.94 | 3.73E-03 |
| 1431182_at   | NA            | -1.74 | 3.78E-03 |
| 1418046_at   | Nap1l2        | -1.64 | 3.82E-03 |
| 1435749_at   | Gda           | -2.76 | 3.82E-03 |
| 1456590_x_at | Akr1b3        | -1.66 | 3.86E-03 |
| 1433699_at   | Tnfaip3       | -2.30 | 3.88E-03 |
| 1435330_at   | Pyhin1        | -2.31 | 3.99E-03 |
| 1429184_at   | Gvin1         | -1.71 | 4.21E-03 |
| 1421269_at   | Ugcg          | -1.56 | 4.24E-03 |
| 1439757_s_at | Epha4         | -1.91 | 4.37E-03 |
| 1459744_at   | Cd53          | -1.54 | 4.39E-03 |
| 1431008_at   | LOC68395      | -1.88 | 4.41E-03 |

|                  |               |       |          |
|------------------|---------------|-------|----------|
| 1435137_s_at     | NA            | -1.52 | 4.44E-03 |
| 1450881_s_at     | NA            | -1.72 | 4.47E-03 |
| 1429688_at       | Arntl2        | -1.52 | 4.48E-03 |
| 1439256_x_at     | Gpr137b-ps    | -1.74 | 4.52E-03 |
| 1453840_at       | NA            | -1.66 | 4.58E-03 |
| 1427285_s_at     | Malat1        | -1.56 | 4.58E-03 |
| 1442878_at       | Prdx6         | -1.59 | 4.62E-03 |
| 1422076_at       | Acot4         | -1.56 | 4.65E-03 |
| 1438115_a_at     | Slc9a3r1      | -1.64 | 4.65E-03 |
| 1436405_at       | Dock4         | -1.52 | 4.86E-03 |
| 1418344_at       | Tmem8         | -1.64 | 5.00E-03 |
| 1426910_at       | Pawr          | -1.53 | 5.01E-03 |
| 1426001_at       | Eomes         | -1.82 | 5.03E-03 |
| 1449670_x_at     | NA            | -1.79 | 5.04E-03 |
| 1452391_at       | Cxadr         | -1.86 | 5.05E-03 |
| 1446586_at       | 8030463A06Rik | -1.72 | 5.07E-03 |
| 1455324_at       | Plcx2         | -1.72 | 5.07E-03 |
| 1429775_a_at     | NA            | -1.59 | 5.11E-03 |
| 1418509_at       | Cbr2          | -1.65 | 5.25E-03 |
| 1419758_at       | Abcb1a        | -1.97 | 5.26E-03 |
| 1455158_at       | Itga3         | -1.58 | 5.27E-03 |
| 1440325_at       | NA            | -1.70 | 5.27E-03 |
| 1454890_at       | Amot          | -1.52 | 5.28E-03 |
| 1425398_at       | NA            | -2.06 | 5.30E-03 |
| 1448749_at       | Plek          | -1.63 | 5.30E-03 |
| 1437133_x_at     | Akr1b3        | -1.57 | 5.33E-03 |
| 1424470_a_at     | Rapgef3       | -1.51 | 5.42E-03 |
| 1450626_at       | Manba         | -1.53 | 5.76E-03 |
| 1427289_at       | Ddhd1         | -1.55 | 5.81E-03 |
| 1448320_at       | Stim1         | -1.53 | 6.06E-03 |
| 1450882_s_at     | NA            | -1.61 | 6.16E-03 |
| 1428083_at       | Neat1         | -1.63 | 6.25E-03 |
| 1448748_at       | Plek          | -1.60 | 6.26E-03 |
| 1442726_s_at     | Al845619      | -1.59 | 6.27E-03 |
| 1453770_at       | Cpa4          | -1.63 | 6.31E-03 |
| 1422914_at       | Sp5           | -1.52 | 6.32E-03 |
| 1424759_at       | Arrdc4        | -1.60 | 6.43E-03 |
| 1447873_x_at     | Bid           | -1.54 | 6.56E-03 |
| 1449151_at       | Cdk18         | -1.62 | 6.57E-03 |
| 1420450_at       | Mmp10         | -1.56 | 6.64E-03 |
| 1427104_at       | Zfp612        | -1.62 | 6.67E-03 |
| 1430310_at       | Tspan11       | -1.52 | 6.84E-03 |
| 1421291_at       | Il18rap       | -1.69 | 6.99E-03 |
| 1416298_at       | Mmp9          | -1.90 | 7.18E-03 |
| 1435640_x_at     | A130040M12Rik | -1.77 | 7.21E-03 |
| 1420641_a_at     | Sqrdl         | -1.51 | 7.26E-03 |
| 1422868_s_at     | Gda           | -2.11 | 7.37E-03 |
| 1454728_s_at     | Atp8a1        | -1.61 | 7.37E-03 |
| 1459937_at       | Ass1          | -1.52 | 7.40E-03 |
| 1418445_at       | Slc16a2       | -1.59 | 7.44E-03 |
| 1457823_at       | Cyr61         | -1.53 | 7.47E-03 |
| AFFX-r2-Ec-bioB- | NA            | -1.65 | 7.72E-03 |
| 1460214_at       | Pcp4          | -1.91 | 7.74E-03 |
| 1435172_at       | Eomes         | -1.82 | 7.90E-03 |
| 1443437_at       | NA            | -1.83 | 7.93E-03 |

|                  |               |       |          |
|------------------|---------------|-------|----------|
| 1452240_at       | Brunol4       | -1.52 | 7.93E-03 |
| 1417634_at       | Sod3          | -1.89 | 7.94E-03 |
| 1449270_at       | Plxdc2        | -1.59 | 8.16E-03 |
| 1450876_at       | NA            | -1.66 | 8.17E-03 |
| 1421606_a_at     | Sult4a1       | -1.52 | 8.23E-03 |
| 1423278_at       | Ptprk         | -1.52 | 8.25E-03 |
| 1455498_at       | Gpr50         | -1.55 | 8.28E-03 |
| 1439795_at       | Gpr64         | -1.68 | 8.73E-03 |
| 1455882_x_at     | Vwc2          | -2.38 | 8.90E-03 |
| 1429021_at       | Epha4         | -2.04 | 9.03E-03 |
| 1440076_at       | NA            | -1.71 | 9.17E-03 |
| 1444021_at       | Sqstm1        | -1.63 | 9.22E-03 |
| AFFX-r2-Ec-bioB- | NA            | -1.57 | 9.33E-03 |
| 1436944_x_at     | NA            | -1.59 | 9.36E-03 |
| 1452065_at       | Vstm2a        | -2.60 | 9.42E-03 |
| 1435349_at       | Nrp2          | -1.74 | 9.52E-03 |
| 1455375_at       | NA            | -1.50 | 9.61E-03 |
| 1417649_at       | Cdkn1c        | -1.59 | 9.67E-03 |
| 1440910_at       | C77370        | -2.13 | 9.72E-03 |
| 1417789_at       | Ccl11         | -3.11 | 9.73E-03 |
| 1436555_at       | Slc7a2        | -2.78 | 9.85E-03 |
| 1450389_s_at     | Pip5k1b       | -1.57 | 1.01E-02 |
| 1422648_at       | Slc7a2        | -1.60 | 1.02E-02 |
| 1433992_at       | Shroom2       | -1.60 | 1.03E-02 |
| 1439944_at       | NA            | -1.71 | 1.03E-02 |
| 1449959_x_at     | Lce1h         | -2.28 | 1.04E-02 |
| 1455087_at       | D7Ertd715e    | -1.52 | 1.06E-02 |
| 1424148_a_at     | Stap2         | -1.56 | 1.07E-02 |
| 1434975_x_at     | Pisd-ps3      | -1.51 | 1.08E-02 |
| 1443897_at       | Ddit3         | -1.91 | 1.08E-02 |
| 1425145_at       | Il1rl1        | -1.50 | 1.10E-02 |
| AFFX-r2-Ec-bioB- | NA            | -1.58 | 1.12E-02 |
| 1439627_at       | Zic1          | -1.85 | 1.12E-02 |
| 1423542_at       | Klk7          | -1.66 | 1.15E-02 |
| 1448291_at       | Mmp9          | -1.84 | 1.18E-02 |
| 1444120_at       | Bin1          | -1.59 | 1.18E-02 |
| AFFX-BioB-3_at   | NA            | -1.62 | 1.18E-02 |
| 1448162_at       | Vcam1         | -1.93 | 1.26E-02 |
| AFFX-BioC-3_at   | NA            | -1.54 | 1.30E-02 |
| 1449823_at       | Dach2         | -1.59 | 1.34E-02 |
| 1449982_at       | Il11          | -1.80 | 1.34E-02 |
| 1429060_at       | Malat1        | -1.60 | 1.41E-02 |
| AFFX-BioC-5_at   | NA            | -1.55 | 1.54E-02 |
| 1427381_at       | Irg1          | -1.60 | 1.57E-02 |
| 1415911_at       | Impact        | -1.52 | 1.57E-02 |
| 1419534_at       | Olr1          | -2.93 | 1.63E-02 |
| 1437935_at       | 4930486G11Rik | -1.51 | 1.65E-02 |
| 1434470_at       | Syt13         | -2.01 | 1.67E-02 |
| 1419759_at       | Abcb1a        | -1.72 | 1.67E-02 |
| 1434102_at       | Nfib          | -1.51 | 1.70E-02 |
| 1424072_at       | 2010107G23Rik | -1.72 | 1.73E-02 |
| 1435750_at       | Gchfr         | -1.56 | 1.75E-02 |
| 1438116_x_at     | Slc9a3r1      | -1.53 | 1.76E-02 |
| 1426528_at       | Nrp2          | -1.76 | 1.77E-02 |
| 1427680_a_at     | Nfib          | -1.60 | 1.78E-02 |

|                  |               |        |          |
|------------------|---------------|--------|----------|
| 1418618_at       | En1           | -1.96  | 1.83E-02 |
| AFFX-r2-Ec-bioC- | NA            | -1.53  | 1.84E-02 |
| 1423091_a_at     | Gpm6b         | -2.14  | 1.88E-02 |
| 1439345_at       | Gpnmb         | -1.73  | 1.89E-02 |
| 1454974_at       | Ntn1          | -1.71  | 1.89E-02 |
| AFFX-BioB-M_at   | NA            | -1.59  | 1.91E-02 |
| 1415989_at       | Vcam1         | -1.85  | 1.95E-02 |
| 1419289_a_at     | Syng1         | -1.54  | 2.01E-02 |
| 1460081_at       | Syt7          | -1.84  | 2.04E-02 |
| 1435515_at       | NA            | -1.66  | 2.04E-02 |
| 1418536_at       | H2-Q7         | -1.75  | 2.10E-02 |
| 1435044_at       | Ebf4          | -1.62  | 2.10E-02 |
| 1441311_at       | Rps6ka2       | -1.65  | 2.16E-02 |
| 1422694_at       | Ttyh1         | -1.58  | 2.21E-02 |
| 1419968_at       | C77370        | -1.70  | 2.23E-02 |
| 1439221_s_at     | Cd40          | -1.86  | 2.29E-02 |
| 1434766_at       | Prkaa2        | -1.52  | 2.35E-02 |
| 1427655_a_at     | A630038E17Rik | -1.88  | 2.35E-02 |
| 1460415_a_at     | Cd40          | -1.65  | 2.52E-02 |
| 1427760_s_at     | NA            | -2.61  | 2.53E-02 |
| 1441776_at       | Tspan11       | -1.52  | 2.55E-02 |
| 1417853_at       | Clca1         | -1.69  | 2.63E-02 |
| 1438076_at       | NA            | -1.50  | 2.81E-02 |
| 1418471_at       | Pgf           | -1.71  | 2.94E-02 |
| 1434425_at       | Tchh          | -1.52  | 2.94E-02 |
| 1427038_at       | Penk          | -2.03  | 2.99E-02 |
| 1457046_s_at     | C77370        | -1.69  | 3.06E-02 |
| 1460259_s_at     | NA            | -2.41  | 3.30E-02 |
| 1437339_s_at     | Pcsk5         | -1.52  | 3.32E-02 |
| 1455186_a_at     | 1190003J15Rik | -1.51  | 3.33E-02 |
| 1460667_at       | U90926        | -1.56  | 3.44E-02 |
| 1421929_at       | Epha4         | -1.76  | 3.50E-02 |
| AFFX-BioB-5_at   | NA            | -1.56  | 3.64E-02 |
| 1422247_a_at     | Uty           | -5.80  | 3.70E-02 |
| 1425942_a_at     | Gpm6b         | -2.00  | 3.91E-02 |
| 1426438_at       | Ddx3y         | -24.02 | 3.95E-02 |
| 1417210_at       | Eif2s3y       | -21.08 | 3.96E-02 |
| 1417852_x_at     | Clca1         | -2.32  | 3.99E-02 |
| 1422008_a_at     | Aqp3          | -1.54  | 3.99E-02 |
| 1426598_at       | Uty           | -7.49  | 3.99E-02 |
| 1451038_at       | Apln          | -1.55  | 4.00E-02 |
| 1452077_at       | Ddx3y         | -22.15 | 4.12E-02 |
| 1422567_at       | Fam129a       | -1.50  | 4.15E-02 |
| 1449473_s_at     | Cd40          | -1.71  | 4.16E-02 |
| 1424886_at       | Ptprd         | -1.52  | 4.27E-02 |
| 1426439_at       | Ddx3y         | -11.10 | 4.50E-02 |
| 1457945_at       | NA            | -2.01  | 4.59E-02 |
| 1421928_at       | Epha4         | -1.68  | 4.60E-02 |
| 1434777_at       | Mycl1         | -1.54  | 4.62E-02 |
| 1419719_at       | Gabrb1        | -1.51  | 4.95E-02 |

Table S1d. Common probes between C/EBPβ-3T3R<sup>asV12</sup> vs. 3T3<sup>RasV12</sup> and *Cebpg*<sup>-/-</sup> vs. WT MEFs. (138 probes)

| ProbeID      | GeneSymbol | <i>RAS</i> <sup>V12</sup> + <i>CEBPB</i> <sup>CR</sup> vs. <i>RAS</i> <sup>V12</sup> - (3T3) |          | <i>Cebpg</i> <sup>-/-</sup> vs. WT - (MEFs) |          |
|--------------|------------|----------------------------------------------------------------------------------------------|----------|---------------------------------------------|----------|
|              |            | Fold Change                                                                                  | p-value  | Fold Change                                 | p-value  |
| 1419082_at   | Serpinb2   | 99.32                                                                                        | 1.94E-88 | 10.73                                       | 1.30E-04 |
| 1419209_at   | Cxcl1      | 82.21                                                                                        | 3.26E-82 | 4.68                                        | 9.28E-03 |
| 1460667_at   | U90926     | 65.84                                                                                        | 8.41E-81 | 4.57                                        | 4.70E-04 |
| 1419728_at   | Cxcl5      | 37.31                                                                                        | 1.06E-73 | 5.51                                        | 1.99E-02 |
| 1415904_at   | Lpl        | 33.57                                                                                        | 3.87E-71 | 1.85                                        | 7.71E-03 |
| 1450883_a_at | Cd36       | 47.41                                                                                        | 6.33E-68 | 6.58                                        | 1.41E-03 |
| 1457644_s_at | Cxcl1      | 33.21                                                                                        | 6.07E-66 | 2.65                                        | 2.91E-02 |
| 1423166_at   | Cd36       | 16.77                                                                                        | 1.70E-48 | 6.21                                        | 1.26E-03 |
| 1448748_at   | Plek       | 7.75                                                                                         | 1.50E-45 | 3.49                                        | 2.92E-02 |
| 1453092_at   | Crct1      | 10.76                                                                                        | 1.27E-43 | 3.51                                        | 5.86E-04 |
| 1416239_at   | Ass1       | 8.48                                                                                         | 3.26E-43 | 1.60                                        | 1.73E-02 |
| 1417263_at   | Ptgs2      | 6.98                                                                                         | 3.39E-43 | 1.92                                        | 1.05E-02 |
| 1448749_at   | Plek       | 6.39                                                                                         | 1.08E-41 | 2.64                                        | 2.75E-02 |
| 1418945_at   | Mmp3       | 7.31                                                                                         | 2.03E-41 | 11.58                                       | 4.51E-06 |
| 1431056_a_at | Lpl        | 7.77                                                                                         | 5.65E-41 | 1.92                                        | 2.99E-03 |
| 1422155_at   | Hist2h3c2  | 6.48                                                                                         | 2.32E-40 | 1.71                                        | 1.92E-02 |
| 1429060_at   | Malat1     | 5.96                                                                                         | 9.40E-40 | 1.72                                        | 1.49E-02 |
| 1420804_s_at | Clec4d     | 5.73                                                                                         | 4.39E-39 | 5.57                                        | 1.11E-02 |
| 1415897_a_at | Mgst1      | 5.40                                                                                         | 5.06E-37 | 1.82                                        | 1.98E-02 |
| 1429348_at   | Sema3c     | 5.12                                                                                         | 1.04E-35 | 2.33                                        | 9.92E-04 |
| 1416077_at   | Adm        | 4.83                                                                                         | 3.63E-34 | 3.55                                        | 1.83E-05 |
| 1420696_at   | Sema3c     | 4.80                                                                                         | 4.12E-34 | 2.02                                        | 1.19E-04 |
| 1416593_at   | Glrx       | 4.62                                                                                         | 2.61E-33 | 2.97                                        | 9.51E-05 |
| 1426235_a_at | Glul       | 4.50                                                                                         | 3.87E-32 | 1.68                                        | 4.68E-03 |
| 1420641_a_at | Sqrdl      | 4.25                                                                                         | 2.77E-31 | 2.16                                        | 9.79E-04 |
| 1416592_at   | Glrx       | 4.25                                                                                         | 8.86E-31 | 2.77                                        | 5.86E-05 |
| 1447830_s_at | Rgs2       | 4.43                                                                                         | 2.09E-30 | 2.01                                        | 1.03E-02 |
| 1437052_s_at | Slc2a3     | 4.15                                                                                         | 2.22E-30 | 2.30                                        | 1.29E-03 |
| 1419248_at   | Rgs2       | 4.12                                                                                         | 3.73E-29 | 2.02                                        | 1.19E-02 |
| 1422243_at   | Fgf7       | 3.78                                                                                         | 8.69E-28 | 1.65                                        | 2.98E-02 |
| 1419247_at   | Rgs2       | 3.69                                                                                         | 1.88E-26 | 1.78                                        | 1.42E-02 |
| 1419589_at   | Cd93       | 3.66                                                                                         | 4.41E-26 | 1.55                                        | 3.30E-02 |
| 1417268_at   | Cd14       | 3.54                                                                                         | 1.72E-25 | 2.58                                        | 1.58E-02 |
| 1459897_a_at | Sbsn       | 3.41                                                                                         | 5.27E-25 | 2.01                                        | 3.72E-03 |
| 1438405_at   | Fgf7       | 3.38                                                                                         | 1.56E-24 | 1.77                                        | 8.52E-03 |
| 1448529_at   | Thbd       | 3.36                                                                                         | 3.17E-24 | 2.14                                        | 2.17E-04 |
| 1439630_x_at | Sbsn       | 3.28                                                                                         | 5.89E-24 | 2.02                                        | 5.92E-03 |
| 1425985_s_at | Masp1      | 3.19                                                                                         | 3.20E-23 | 1.65                                        | 1.93E-02 |
| 1419647_a_at | Ier3       | 3.16                                                                                         | 1.40E-22 | 1.72                                        | 5.85E-04 |
| 1426452_a_at | Rab30      | 3.29                                                                                         | 2.61E-21 | 1.83                                        | 3.63E-04 |
| 1417256_at   | Mmp13      | 4.06                                                                                         | 8.99E-21 | 22.45                                       | 2.07E-05 |
| 1419431_at   | Ereg       | 2.92                                                                                         | 1.34E-20 | 2.44                                        | 1.81E-04 |
| 1423547_at   | Lyz2       | 3.05                                                                                         | 2.53E-20 | 3.99                                        | 3.69E-02 |
| 1447839_x_at | Adm        | 2.97                                                                                         | 2.74E-20 | 3.64                                        | 6.19E-05 |
| 1436530_at   | Gm11428    | 3.89                                                                                         | 4.41E-20 | 2.15                                        | 1.04E-02 |
| 1452141_a_at | Sepp1      | 2.90                                                                                         | 1.03E-19 | 2.65                                        | 9.78E-03 |
| 1421840_at   | Abca1      | 2.84                                                                                         | 1.33E-19 | 2.42                                        | 1.68E-03 |
| 1438602_s_at | Masp1      | 2.76                                                                                         | 8.43E-19 | 1.64                                        | 9.28E-03 |
| 1416727_a_at | Cyb5       | 2.74                                                                                         | 9.32E-19 | 1.66                                        | 1.59E-03 |



|              |           |      |          |      |          |
|--------------|-----------|------|----------|------|----------|
| 1416926_at   | Trp53inp1 | 2.85 | 1.15E-18 | 1.61 | 4.70E-04 |
| 1416666_at   | Serpine2  | 2.73 | 1.18E-18 | 1.74 | 3.63E-04 |
| 1435749_at   | Gda       | 2.84 | 1.58E-18 | 1.83 | 4.40E-03 |
| 1416527_at   | Rab32     | 2.76 | 1.74E-18 | 2.06 | 9.64E-04 |
| 1435748_at   | Gda       | 2.64 | 1.66E-17 | 1.58 | 1.64E-02 |
| 1438097_at   | Rab20     | 2.61 | 1.48E-16 | 1.70 | 3.67E-03 |
| 1451755_a_at | Apobec1   | 2.52 | 2.60E-16 | 1.82 | 4.57E-02 |
| 1419561_at   | Ccl3      | 3.57 | 2.85E-16 | 2.52 | 3.97E-02 |
| 1427717_at   | Cd80      | 2.63 | 3.12E-16 | 2.06 | 9.95E-04 |
| 1422573_at   | Ampd3     | 2.80 | 3.23E-16 | 5.63 | 2.33E-05 |
| 1429352_at   | Mocos     | 2.43 | 2.35E-15 | 1.56 | 4.55E-03 |
| 1460521_a_at | Obfc2a    | 2.53 | 3.05E-15 | 1.86 | 3.08E-02 |
| 1452207_at   | Cited2    | 2.41 | 3.55E-15 | 1.59 | 2.40E-03 |
| 1420380_at   | Ccl2      | 2.41 | 4.61E-15 | 2.63 | 6.80E-03 |
| 1432826_a_at | Cd80      | 2.45 | 4.72E-15 | 2.09 | 2.39E-03 |
| 1424683_at   | Fam134b   | 2.38 | 1.27E-14 | 2.23 | 3.88E-02 |
| 1428942_at   | Mt2       | 2.37 | 1.46E-14 | 5.61 | 2.71E-06 |
| 1435462_at   | Plcx2     | 2.40 | 1.80E-14 | 1.73 | 4.27E-04 |
| 1426604_at   | Rnasel    | 2.44 | 2.67E-14 | 1.76 | 9.93E-03 |
| 1448239_at   | Hmox1     | 2.33 | 3.92E-14 | 6.63 | 2.06E-06 |
| 1449824_at   | Prg4      | 2.36 | 3.92E-14 | 2.23 | 1.05E-02 |
| 1420664_s_at | Procr     | 2.31 | 5.73E-14 | 3.19 | 2.88E-05 |
| 1421267_a_at | Cited2    | 2.40 | 1.24E-13 | 1.58 | 1.15E-02 |
| 1450884_at   | Cd36      | 2.45 | 1.73E-13 | 1.80 | 1.69E-02 |
| 1417273_at   | Pdk4      | 2.22 | 6.26E-13 | 2.24 | 4.72E-04 |
| 1426599_a_at | Slc2a1    | 2.21 | 9.18E-13 | 1.56 | 5.61E-03 |
| 1425895_a_at | Id1       | 2.23 | 1.15E-12 | 1.60 | 1.22E-02 |
| 1450214_at   | NA        | 2.18 | 1.79E-12 | 1.93 | 4.70E-04 |
| 1449965_at   | Mcpt8     | 2.22 | 1.96E-12 | 6.76 | 9.89E-05 |
| 1419309_at   | Pdpr      | 2.17 | 2.40E-12 | 2.08 | 4.70E-04 |
| 1420502_at   | Sat1      | 2.17 | 2.50E-12 | 1.54 | 1.03E-02 |
| 1455324_at   | Plcx2     | 2.17 | 3.78E-12 | 1.80 | 3.56E-04 |
| 1422317_a_at | Il1rl1    | 2.14 | 3.89E-12 | 2.05 | 3.85E-03 |
| 1420450_at   | Mmp10     | 2.17 | 2.02E-11 | 2.32 | 1.64E-03 |
| 1451950_a_at | Cd80      | 2.10 | 4.08E-11 | 2.85 | 1.57E-03 |
| 1426806_at   | Obfc2a    | 2.09 | 6.10E-11 | 1.85 | 3.78E-03 |
| 1452203_at   | Obfc2a    | 2.07 | 9.75E-11 | 1.88 | 2.81E-03 |
| 1434430_s_at | NA        | 2.12 | 1.05E-10 | 1.54 | 1.19E-02 |
| 1426600_at   | Slc2a1    | 2.01 | 1.45E-10 | 1.62 | 1.42E-02 |
| 1430623_s_at | Obfc2a    | 2.01 | 4.23E-10 | 1.77 | 1.18E-02 |
| 1448306_at   | Nfkb1a    | 1.95 | 1.16E-09 | 1.60 | 3.84E-03 |
| 1456130_at   | NA        | 1.95 | 1.89E-09 | 3.24 | 1.78E-03 |
| 1426454_at   | Arhgdib   | 1.91 | 4.38E-09 | 1.88 | 1.60E-04 |
| 1425145_at   | Il1rl1    | 1.90 | 4.46E-09 | 2.17 | 1.34E-04 |
| 1420715_a_at | Pparg     | 1.92 | 9.38E-09 | 1.56 | 4.87E-02 |
| 1421326_at   | Csf2rb    | 1.96 | 1.30E-08 | 1.66 | 2.07E-02 |
| 1454617_at   | Arrdc3    | 1.87 | 1.39E-08 | 1.81 | 1.43E-03 |
| 1420558_at   | Selp      | 1.84 | 2.53E-08 | 1.69 | 7.26E-04 |
| 1416432_at   | Pfkfb3    | 1.83 | 3.18E-08 | 2.20 | 2.02E-04 |
| 1449450_at   | Ptges     | 1.83 | 4.20E-08 | 2.82 | 9.64E-05 |
| 1417777_at   | Ptgr1     | 1.81 | 6.03E-08 | 1.79 | 3.06E-04 |
| 1448211_at   | Atp6v0e2  | 1.83 | 8.64E-08 | 2.55 | 7.93E-04 |
| 1419132_at   | Tlr2      | 1.78 | 1.43E-07 | 1.57 | 2.71E-02 |
| 1437190_at   | Styk1     | 1.76 | 4.05E-07 | 1.62 | 6.96E-03 |
| 1434431_x_at | NA        | 1.81 | 4.50E-07 | 1.59 | 7.02E-03 |

|              |               |      |          |      |          |
|--------------|---------------|------|----------|------|----------|
| 1450826_a_at | Saa3          | 1.74 | 5.57E-07 | 3.35 | 1.00E-02 |
| 1424126_at   | Alas1         | 1.73 | 6.93E-07 | 1.87 | 3.92E-05 |
| 1418480_at   | Ppbbp         | 1.72 | 8.76E-07 | 3.89 | 2.61E-03 |
| 1421031_a_at | 2310016C08Rik | 1.74 | 9.52E-07 | 2.03 | 9.51E-05 |
| 1428083_at   | Neat1         | 1.71 | 1.38E-06 | 1.85 | 5.48E-03 |
| 1439747_at   | Ptges         | 1.71 | 1.66E-06 | 3.38 | 2.31E-04 |
| 1434815_a_at | Mapkapk3      | 1.70 | 2.16E-06 | 1.79 | 1.60E-04 |
| 1427718_a_at | Mdm2          | 1.68 | 2.36E-06 | 2.40 | 6.81E-05 |
| 1449363_at   | Atf3          | 1.69 | 3.43E-06 | 1.74 | 1.49E-02 |
| 1453708_a_at | Gsto2         | 1.64 | 7.22E-06 | 1.89 | 8.68E-03 |
| 1449449_at   | Ptges         | 1.64 | 7.53E-06 | 2.32 | 5.95E-04 |
| 1455265_a_at | Rgs16         | 1.65 | 8.33E-06 | 1.54 | 6.96E-03 |
| 1421830_at   | NA            | 1.64 | 8.50E-06 | 1.75 | 3.24E-03 |
| 1421792_s_at | Trem2         | 1.63 | 1.05E-05 | 2.32 | 2.19E-02 |
| 1431050_at   | Rps6ka5       | 1.63 | 1.33E-05 | 1.62 | 1.26E-03 |
| 1424352_at   | Cyp4a12a      | 1.62 | 1.41E-05 | 2.03 | 7.21E-04 |
| 1426037_a_at | Rgs16         | 1.62 | 1.52E-05 | 2.05 | 7.93E-04 |
| 1428393_at   | Nrn1          | 1.62 | 1.70E-05 | 3.15 | 2.21E-03 |
| 1451452_a_at | Rgs16         | 1.60 | 2.55E-05 | 1.92 | 6.29E-03 |
| 1417816_s_at | Serinc3       | 1.59 | 3.32E-05 | 1.54 | 4.76E-03 |
| 1448318_at   | Plin2         | 1.59 | 3.61E-05 | 1.56 | 2.50E-02 |
| 1435137_s_at | NA            | 1.57 | 5.39E-05 | 1.51 | 3.25E-02 |
| 1452161_at   | Tiparp        | 1.57 | 5.80E-05 | 1.69 | 1.44E-03 |
| 1424697_at   | Dtwd1         | 1.56 | 6.25E-05 | 1.59 | 5.79E-04 |
| 1418248_at   | Gla           | 1.56 | 7.27E-05 | 1.57 | 1.01E-03 |
| 1420913_at   | Slco2a1       | 1.55 | 7.92E-05 | 1.74 | 7.26E-04 |
| 1449442_at   | Pex11a        | 1.55 | 8.80E-05 | 1.51 | 1.58E-02 |
| 1439965_at   | NA            | 1.53 | 1.88E-04 | 1.67 | 3.94E-02 |
| 1423605_a_at | Mdm2          | 1.51 | 2.27E-04 | 2.09 | 3.92E-05 |
| 1455737_at   | Ppm1h         | 1.51 | 2.50E-04 | 2.06 | 2.02E-02 |
| 1449641_at   | Adk           | 1.51 | 2.58E-04 | 1.51 | 2.26E-02 |
| 1428749_at   | Dmxl2         | 1.52 | 2.58E-04 | 1.64 | 8.63E-03 |
| 1449402_at   | Chst7         | 1.51 | 2.90E-04 | 1.59 | 2.94E-02 |

Table S1e. C/EBP $\beta$ -3T3<sup>RasV12</sup> vs. 3T3<sup>RasV12</sup> and *Cebpb*<sup>-/-</sup>/Ras<sup>V12</sup> vs. WT/Ras<sup>V12</sup> MEFs. (121 probes)

| ProbeID      | GeneSymbol | <i>Cebpg</i> <sup>-/-</sup> vs. WT - (MEFs) |          | RAS <sup>V12</sup> + <i>Cebpb</i> <sup>-/-</sup> vs. RAS <sup>V12</sup> - (MEF) |          |
|--------------|------------|---------------------------------------------|----------|---------------------------------------------------------------------------------|----------|
|              |            | Fold Change                                 | p-value  | Fold Change                                                                     | p-value  |
| 1450826_a_at | Saa3       | 3.35                                        | 1.00E-02 | -70.87                                                                          | 3.72E-09 |
| 1449195_s_at | Cxcl16     | 1.78                                        | 2.20E-03 | -7.03                                                                           | 3.02E-07 |
| 1417256_at   | Mmp13      | 22.45                                       | 2.07E-05 | -23.34                                                                          | 5.46E-07 |
| 1417273_at   | Pdk4       | 2.24                                        | 4.72E-04 | -4.28                                                                           | 4.16E-06 |
| 1449965_at   | Mcpt8      | 6.76                                        | 9.89E-05 | -2.88                                                                           | 4.37E-06 |
| 1422573_at   | Ampd3      | 5.63                                        | 2.33E-05 | -3.03                                                                           | 5.32E-06 |
| 1433909_at   | Syt17      | 1.79                                        | 1.13E-03 | -3.56                                                                           | 5.47E-06 |
| 1415897_a_at | Mgst1      | 1.82                                        | 1.98E-02 | -2.85                                                                           | 8.21E-06 |
| 1453092_at   | Crct1      | 3.51                                        | 5.86E-04 | -4.64                                                                           | 1.21E-05 |
| 1448871_at   | Mapk13     | 3.29                                        | 5.13E-04 | -3.02                                                                           | 1.35E-05 |
| 1421227_at   | NA         | 3.08                                        | 1.44E-03 | -3.45                                                                           | 1.63E-05 |
| 1448306_at   | Nfkbia     | 1.60                                        | 3.84E-03 | -2.62                                                                           | 2.12E-05 |
| 1457644_s_at | Cxcl1      | 2.65                                        | 2.91E-02 | -14.50                                                                          | 2.23E-05 |
| 1416239_at   | Ass1       | 1.60                                        | 1.73E-02 | -2.54                                                                           | 2.54E-05 |
| 1418248_at   | Gla        | 1.57                                        | 1.01E-03 | -2.43                                                                           | 2.71E-05 |
| 1448303_at   | Gpnmb      | 2.78                                        | 1.08E-02 | -2.79                                                                           | 2.77E-05 |
| 1434909_at   | Rragd      | 1.60                                        | 1.55E-03 | -2.19                                                                           | 3.19E-05 |
| 1420380_at   | Ccl2       | 2.63                                        | 6.80E-03 | -2.35                                                                           | 3.31E-05 |
| 1450171_x_at | Gzme       | 2.61                                        | 4.44E-03 | -3.56                                                                           | 3.65E-05 |
| 1419209_at   | Cxcl1      | 4.68                                        | 9.28E-03 | -19.92                                                                          | 4.11E-05 |
| 1428942_at   | Mt2        | 5.61                                        | 2.71E-06 | -2.47                                                                           | 6.42E-05 |
| 1416593_at   | Glrx       | 2.97                                        | 9.51E-05 | -2.07                                                                           | 7.71E-05 |
| 1419647_a_at | Ier3       | 1.72                                        | 5.85E-04 | -2.07                                                                           | 8.10E-05 |
| 1448529_at   | Thbd       | 2.14                                        | 2.17E-04 | -1.85                                                                           | 8.48E-05 |
| 1417263_at   | Ptgs2      | 1.92                                        | 1.05E-02 | -2.30                                                                           | 8.50E-05 |
| 1438097_at   | Rab20      | 1.70                                        | 3.67E-03 | -2.05                                                                           | 8.56E-05 |
| 1448239_at   | Hmox1      | 6.63                                        | 2.06E-06 | -2.49                                                                           | 9.15E-05 |
| 1438160_x_at | Slco4a1    | 1.94                                        | 2.10E-02 | -2.83                                                                           | 9.59E-05 |
| 1424683_at   | Fam134b    | 2.23                                        | 3.88E-02 | -2.10                                                                           | 1.04E-04 |
| 1416592_at   | Glrx       | 2.77                                        | 5.86E-05 | -2.00                                                                           | 1.40E-04 |
| 1437197_at   | Sorbs2     | 1.92                                        | 2.09E-03 | -2.26                                                                           | 1.54E-04 |
| 1452141_a_at | Sepp1      | 2.65                                        | 9.78E-03 | -2.16                                                                           | 2.22E-04 |
| 1434559_at   | Stx3       | 1.57                                        | 4.40E-03 | -1.82                                                                           | 2.25E-04 |
| 1418872_at   | Abcb1b     | 2.42                                        | 4.27E-04 | -1.77                                                                           | 2.33E-04 |
| 1458236_at   | NA         | 1.93                                        | 1.65E-03 | -3.29                                                                           | 2.34E-04 |
| 1425154_a_at | Csf1       | 1.70                                        | 5.94E-03 | -2.78                                                                           | 2.36E-04 |
| 1438405_at   | Fgf7       | 1.77                                        | 8.52E-03 | -2.05                                                                           | 2.99E-04 |
| 1455803_at   | Slco4a1    | 1.80                                        | 3.41E-02 | -2.34                                                                           | 3.07E-04 |
| 1429352_at   | Mocos      | 1.56                                        | 4.55E-03 | -1.74                                                                           | 3.20E-04 |
| 1419431_at   | Ereg       | 2.44                                        | 1.81E-04 | -1.69                                                                           | 3.28E-04 |
| 1449449_at   | Ptges      | 2.32                                        | 5.95E-04 | -1.95                                                                           | 3.60E-04 |
| 1449324_at   | Ero1l      | 1.58                                        | 1.97E-02 | -1.65                                                                           | 3.65E-04 |
| 1424697_at   | Dtwd1      | 1.59                                        | 5.79E-04 | -1.66                                                                           | 4.05E-04 |
| 1422243_at   | Fgf7       | 1.65                                        | 2.98E-02 | -2.16                                                                           | 4.06E-04 |
| 1425155_x_at | Csf1       | 1.81                                        | 4.35E-04 | -3.27                                                                           | 4.18E-04 |
| 1422470_at   | Bnip3      | 2.63                                        | 8.37E-05 | -1.60                                                                           | 4.22E-04 |
| 1442226_at   | Sema3e     | 1.67                                        | 1.70E-02 | -4.31                                                                           | 4.73E-04 |
| 1455197_at   | Rnd1       | 2.11                                        | 3.59E-04 | -2.57                                                                           | 4.91E-04 |
| 1425536_at   | Stx3       | 1.52                                        | 3.02E-03 | -1.70                                                                           | 4.98E-04 |
| 1419132_at   | Tlr2       | 1.57                                        | 2.71E-02 | -1.77                                                                           | 5.06E-04 |

|              |               |      |          |       |          |
|--------------|---------------|------|----------|-------|----------|
| 1449450_at   | Ptges         | 2.82 | 9.64E-05 | -1.71 | 5.24E-04 |
| 1448318_at   | Plin2         | 1.56 | 2.50E-02 | -1.80 | 5.32E-04 |
| 1449153_at   | Mmp12         | 4.84 | 4.39E-03 | -2.03 | 6.38E-04 |
| 1435748_at   | Gda           | 1.58 | 1.64E-02 | -2.91 | 6.62E-04 |
| 1425906_a_at | Sema3e        | 1.78 | 1.77E-02 | -4.69 | 6.76E-04 |
| 1419309_at   | Pdpm          | 2.08 | 4.70E-04 | -1.61 | 6.84E-04 |
| 1439630_x_at | Sbsn          | 2.02 | 5.92E-03 | -1.95 | 6.96E-04 |
| 1427673_a_at | Sema3e        | 1.60 | 1.47E-02 | -4.56 | 7.43E-04 |
| 1447839_x_at | Adm           | 3.64 | 6.19E-05 | -1.97 | 7.54E-04 |
| 1438030_at   | Rasgrp3       | 1.81 | 7.89E-04 | -1.73 | 7.59E-04 |
| 1460220_a_at | Csf1          | 1.65 | 3.45E-03 | -1.90 | 7.66E-04 |
| 1435680_a_at | Dpp7          | 1.58 | 3.36E-03 | -1.58 | 7.68E-04 |
| 1439747_at   | Ptges         | 3.38 | 2.31E-04 | -1.68 | 7.74E-04 |
| 1427912_at   | Cbr3          | 2.24 | 1.88E-04 | -1.70 | 7.92E-04 |
| 1417816_s_at | Serinc3       | 1.54 | 4.76E-03 | -1.56 | 8.79E-04 |
| 1416368_at   | Gsta4         | 2.73 | 8.37E-05 | -1.69 | 9.45E-04 |
| 1424263_at   | Aif1l         | 1.55 | 1.99E-02 | -1.56 | 9.93E-04 |
| 1426604_at   | Rnasel        | 1.76 | 9.93E-03 | -1.57 | 1.00E-03 |
| 1415948_at   | Creg1         | 2.02 | 1.07E-02 | -1.52 | 1.03E-03 |
| 1416077_at   | Adm           | 3.55 | 1.83E-05 | -1.95 | 1.19E-03 |
| 1425420_s_at | Lats2         | 1.92 | 4.76E-04 | -1.64 | 1.19E-03 |
| 1448914_a_at | Csf1          | 1.88 | 5.77E-03 | -2.19 | 1.20E-03 |
| 1426930_at   | Brunol4       | 1.63 | 2.52E-02 | -1.55 | 1.25E-03 |
| 1459897_a_at | Sbsn          | 2.01 | 3.72E-03 | -2.15 | 1.34E-03 |
| 1421267_a_at | Cited2        | 1.58 | 1.15E-02 | -1.60 | 1.36E-03 |
| 1423570_at   | Abcg1         | 2.22 | 1.94E-02 | -1.80 | 1.45E-03 |
| 1450063_at   | NA            | 2.19 | 4.76E-04 | -1.80 | 1.49E-03 |
| 1417960_at   | Cpeb1         | 1.91 | 2.36E-02 | -1.60 | 1.50E-03 |
| 1428357_at   | 2610019F03Rik | 1.60 | 1.08E-02 | -1.59 | 1.68E-03 |
| 1425546_a_at | Trf           | 2.36 | 1.29E-02 | -3.70 | 1.75E-03 |
| 1420804_s_at | Clec4d        | 5.57 | 1.11E-02 | -1.54 | 1.80E-03 |
| 1442156_at   | E030030I06Rik | 1.57 | 8.19E-04 | -1.75 | 1.99E-03 |
| 1433506_at   | Lrrc8d        | 2.01 | 3.59E-04 | -1.59 | 2.20E-03 |
| 1429348_at   | Sema3c        | 2.33 | 9.92E-04 | -1.53 | 2.28E-03 |
| 1422317_a_at | Il1rl1        | 2.05 | 3.85E-03 | -1.59 | 2.30E-03 |
| 1450409_a_at | Slc48a1       | 2.07 | 1.12E-04 | -1.58 | 2.41E-03 |
| 1450004_at   | Tslp          | 2.74 | 2.02E-04 | -3.13 | 2.45E-03 |
| 1438148_at   | Cxcl3         | 2.76 | 7.93E-04 | -3.59 | 2.97E-03 |
| 1419728_at   | Cxcl5         | 5.51 | 1.99E-02 | -8.88 | 3.01E-03 |
| 1435462_at   | Plcx2         | 1.73 | 4.27E-04 | -1.76 | 3.12E-03 |
| 1443870_at   | Abcc4         | 1.73 | 5.18E-04 | -1.67 | 3.14E-03 |
| 1416527_at   | Rab32         | 2.06 | 9.64E-04 | -1.62 | 3.18E-03 |
| 1435836_at   | Pdk1          | 1.51 | 1.05E-02 | -1.54 | 3.20E-03 |
| 1427932_s_at | NA            | 1.63 | 5.42E-03 | -1.51 | 3.22E-03 |
| 1431182_at   | NA            | 1.54 | 5.47E-03 | -1.74 | 3.78E-03 |
| 1418046_at   | Nap1l2        | 1.53 | 4.72E-02 | -1.64 | 3.82E-03 |
| 1435749_at   | Gda           | 1.83 | 4.40E-03 | -2.76 | 3.82E-03 |
| 1435137_s_at | NA            | 1.51 | 3.25E-02 | -1.52 | 4.44E-03 |
| 1449670_x_at | NA            | 1.62 | 2.36E-02 | -1.79 | 5.04E-03 |
| 1455324_at   | Plcx2         | 1.80 | 3.56E-04 | -1.72 | 5.07E-03 |
| 1440325_at   | NA            | 1.57 | 9.92E-04 | -1.70 | 5.27E-03 |
| 1454890_at   | Amot          | 1.88 | 3.48E-03 | -1.52 | 5.28E-03 |
| 1448749_at   | Plek          | 2.64 | 2.75E-02 | -1.63 | 5.30E-03 |
| 1428083_at   | Neat1         | 1.85 | 5.48E-03 | -1.63 | 6.25E-03 |
| 1448748_at   | Plek          | 3.49 | 2.92E-02 | -1.60 | 6.26E-03 |

|              |         |      |          |       |          |
|--------------|---------|------|----------|-------|----------|
| 1420450_at   | Mmp10   | 2.32 | 1.64E-03 | -1.56 | 6.64E-03 |
| 1420641_a_at | Sqrdl   | 2.16 | 9.79E-04 | -1.51 | 7.26E-03 |
| 1452240_at   | Brunol4 | 1.65 | 6.53E-03 | -1.52 | 7.93E-03 |
| 1439795_at   | Gpr64   | 1.51 | 1.82E-02 | -1.68 | 8.73E-03 |
| 1440076_at   | NA      | 1.67 | 7.39E-03 | -1.71 | 9.17E-03 |
| 1449959_x_at | Lce1h   | 4.71 | 8.53E-03 | -2.28 | 1.04E-02 |
| 1425145_at   | Il1rl1  | 2.17 | 1.34E-04 | -1.50 | 1.10E-02 |
| 1439627_at   | Zic1    | 1.84 | 1.30E-02 | -1.85 | 1.12E-02 |
| 1449982_at   | Il11    | 2.48 | 2.56E-04 | -1.80 | 1.34E-02 |
| 1429060_at   | Malat1  | 1.72 | 1.49E-02 | -1.60 | 1.41E-02 |
| 1434470_at   | Syt13   | 1.87 | 3.90E-02 | -2.01 | 1.67E-02 |
| 1439345_at   | Gpnb    | 1.67 | 1.89E-02 | -1.73 | 1.89E-02 |
| 1427760_s_at | NA      | 4.24 | 1.11E-04 | -2.61 | 2.53E-02 |
| 1427038_at   | Penk    | 1.73 | 6.53E-03 | -2.03 | 2.99E-02 |
| 1460667_at   | U90926  | 4.57 | 4.70E-04 | -1.56 | 3.44E-02 |



Table S1f. *Cebpb*<sup>-/-</sup>/Ras<sup>V12</sup> vs. WT/Ras<sup>V12</sup> MEFs and *Cebpg*<sup>-/-</sup> vs. WT MEFs. (224)

| ProbeID      | GeneSymbol    | Fold Change | p-value   | Fold Change | p-value  |
|--------------|---------------|-------------|-----------|-------------|----------|
| 1419394_s_at | S100a8        | 299.3930447 | 5.72E-107 | -10.75      | 7.22E-05 |
| 1427747_a_at | Lcn2          | 359.0196788 | 4.85E-94  | -46.97      | 1.53E-08 |
| 1419209_at   | Cxcl1         | 82.2055281  | 3.26E-82  | -19.92      | 4.11E-05 |
| 1460667_at   | U90926        | 65.84208817 | 8.41E-81  | -1.56       | 3.44E-02 |
| 1419136_at   | Akr1c18       | 32.72967217 | 2.18E-77  | -4.63       | 8.73E-05 |
| 1419728_at   | Cxcl5         | 37.30621013 | 1.06E-73  | -8.88       | 3.01E-03 |
| 1418666_at   | Ptx3          | 30.62392746 | 4.82E-69  | -4.11       | 1.08E-04 |
| 1455299_at   | Vgll3         | 30.22210114 | 5.94E-67  | -1.62       | 8.69E-04 |
| 1457644_s_at | Cxcl1         | 33.20735965 | 6.07E-66  | -14.50      | 2.23E-05 |
| 1418423_s_at | NA            | 26.71599443 | 1.04E-62  | -5.34       | 7.01E-07 |
| 1439878_at   | Ivl           | 14.55267077 | 6.39E-60  | -3.94       | 1.24E-03 |
| 1422240_s_at | Sprrr2h       | 69.24361492 | 1.55E-58  | -11.70      | 1.18E-06 |
| 1421207_at   | Lif           | 11.06313898 | 1.22E-55  | -4.61       | 3.24E-07 |
| 1419609_at   | Ccr1          | 11.29971911 | 7.92E-55  | -2.55       | 5.15E-04 |
| 1448377_at   | Slpi          | 10.26615546 | 1.08E-53  | -2.49       | 1.60E-05 |
| 1452418_at   | 1200016E24Rik | 12.15653985 | 3.16E-52  | -2.94       | 3.56E-05 |
| 1421473_at   | Il1a          | 25.81915718 | 5.47E-52  | -19.02      | 2.10E-07 |
| 1418674_at   | Osmr          | 9.893895108 | 2.47E-50  | -1.84       | 2.65E-03 |
| 1448532_at   | Prl8a9        | 28.55120503 | 5.20E-50  | -8.57       | 3.07E-04 |
| 1452614_at   | Bcl2l15       | 10.08142822 | 3.28E-49  | -5.76       | 4.60E-05 |
| 1423954_at   | C3            | 16.61943644 | 1.98E-48  | -11.01      | 4.11E-07 |
| 1419691_at   | Camp          | 16.37433562 | 4.84E-47  | -1.62       | 3.58E-03 |
| 1422222_at   | Ivl           | 7.814453333 | 1.12E-46  | -3.03       | 8.03E-04 |
| 1426818_at   | Arrdc4        | 7.704350955 | 7.46E-46  | -2.99       | 4.11E-05 |
| 1450165_at   | Sfn2          | 8.702279599 | 1.46E-45  | -2.41       | 2.40E-04 |
| 1448748_at   | Plek          | 7.745067618 | 1.50E-45  | -1.60       | 6.26E-03 |
| 1450297_at   | Il6           | 9.884718415 | 1.50E-45  | -18.94      | 4.10E-07 |
| 1436996_x_at | Lyz1          | 10.59519297 | 2.47E-45  | -1.78       | 2.65E-03 |
| 1419534_at   | Olr1          | 8.137015759 | 1.57E-44  | -2.93       | 1.63E-02 |
| 1453943_a_at | Acpp          | 10.38876892 | 3.71E-44  | -4.64       | 2.25E-04 |
| 1417483_at   | Nfkbiz        | 7.656693736 | 1.21E-43  | -3.04       | 1.45E-03 |
| 1453092_at   | Crct1         | 10.75897163 | 1.27E-43  | -4.64       | 1.21E-05 |
| 1416239_at   | Ass1          | 8.475477125 | 3.26E-43  | -2.54       | 2.54E-05 |
| 1417263_at   | Ptgs2         | 6.976401108 | 3.39E-43  | -2.30       | 8.50E-05 |
| 1448749_at   | Plek          | 6.392811196 | 1.08E-41  | -1.63       | 5.30E-03 |
| 1442187_at   | Bdkrb2        | 6.146476208 | 3.71E-41  | -6.26       | 4.19E-05 |
| 1429060_at   | Malat1        | 5.958946337 | 9.40E-40  | -1.60       | 1.41E-02 |
| 1456248_at   | NA            | 5.966118198 | 1.15E-39  | -3.47       | 1.63E-05 |
| 1441855_x_at | Cxcl1         | 8.496198682 | 1.30E-39  | -3.66       | 1.57E-05 |
| 1420804_s_at | Clec4d        | 5.732388206 | 4.39E-39  | -1.54       | 1.80E-03 |
| 1422177_at   | Il13ra2       | 6.447187649 | 9.55E-39  | -2.02       | 8.56E-05 |
| 1415897_a_at | Mgst1         | 5.403145905 | 5.06E-37  | -2.85       | 8.21E-06 |
| 1429348_at   | Sema3c        | 5.116087692 | 1.04E-35  | -1.53       | 2.28E-03 |
| 1450160_at   | Lif           | 5.162124326 | 3.88E-35  | -3.62       | 5.32E-06 |
| 1417262_at   | Ptgs2         | 5.067000611 | 6.80E-35  | -1.56       | 2.31E-03 |
| 1418675_at   | Osmr          | 4.905465572 | 1.91E-34  | -1.73       | 2.93E-03 |
| 1448881_at   | Hp            | 5.608665167 | 1.97E-34  | -2.36       | 3.73E-03 |
| 1416077_at   | Adm           | 4.826817309 | 3.63E-34  | -1.95       | 1.19E-03 |
| 1449366_at   | Mmp8          | 4.884543155 | 4.50E-34  | -3.59       | 6.67E-04 |

|              |          |             |          |        |          |
|--------------|----------|-------------|----------|--------|----------|
| 1457823_at   | Cyr61    | 5.251431619 | 4.79E-34 | -1.53  | 7.47E-03 |
| 1416593_at   | Glrx     | 4.620435201 | 2.61E-33 | -2.07  | 7.71E-05 |
| 1451006_at   | Xdh      | 4.56381987  | 3.31E-33 | -3.17  | 5.32E-06 |
| 1449875_s_at | NA       | 4.85145483  | 2.26E-31 | -1.59  | 7.79E-04 |
| 1420641_a_at | Sqrdl    | 4.253052325 | 2.77E-31 | -1.51  | 7.26E-03 |
| 1416592_at   | Glrx     | 4.254280467 | 8.86E-31 | -2.00  | 1.40E-04 |
| 1417633_at   | Sod3     | 4.111677994 | 7.28E-30 | -4.61  | 2.00E-05 |
| 1419832_s_at | Acpp     | 6.017025991 | 9.21E-30 | -4.91  | 1.11E-04 |
| 1449507_a_at | Cd47     | 3.971372471 | 1.86E-29 | -2.06  | 1.97E-04 |
| 1419473_a_at | Cck      | 3.98601001  | 3.53E-29 | -5.23  | 7.48E-04 |
| 1448728_a_at | Nfkbiz   | 4.03644738  | 4.07E-29 | -3.93  | 6.05E-04 |
| 1419099_x_at | Stom     | 3.952377887 | 4.46E-29 | -1.69  | 2.33E-03 |
| 1448162_at   | Vcam1    | 3.91133332  | 6.48E-28 | -1.93  | 1.26E-02 |
| 1419098_at   | Stom     | 3.815110553 | 7.22E-28 | -1.65  | 2.43E-03 |
| 1422243_at   | Fgf7     | 3.77613825  | 8.69E-28 | -2.16  | 4.06E-04 |
| 1449591_at   | Casp4    | 3.69625895  | 1.80E-27 | -2.29  | 2.56E-04 |
| 1449585_at   | Il1rap   | 3.786076974 | 2.27E-27 | -1.65  | 1.30E-03 |
| 1424759_at   | Arrdc4   | 3.656659148 | 1.51E-26 | -1.60  | 6.43E-03 |
| 1449677_s_at | Tmem38b  | 3.896225702 | 2.00E-26 | -1.55  | 2.18E-03 |
| 1419097_a_at | Stom     | 3.579055459 | 2.29E-26 | -1.68  | 6.60E-04 |
| 1424524_at   | Dram1    | 3.629780131 | 1.99E-25 | -1.68  | 2.28E-03 |
| 1441975_at   | Acpp     | 3.770620838 | 3.22E-25 | -2.15  | 3.30E-04 |
| 1438910_a_at | Stom     | 3.409979485 | 4.90E-25 | -1.75  | 5.91E-04 |
| 1459897_a_at | Sbsn     | 3.406265348 | 5.27E-25 | -2.15  | 1.34E-03 |
| 1421304_at   | Klra2    | 3.656443156 | 1.09E-24 | -1.76  | 6.05E-04 |
| 1438405_at   | Fgf7     | 3.379328717 | 1.56E-24 | -2.05  | 2.99E-04 |
| 1448529_at   | Thbd     | 3.358592312 | 3.17E-24 | -1.85  | 8.48E-05 |
| 1452296_at   | Slit3    | 3.361025472 | 5.83E-24 | -2.09  | 5.76E-04 |
| 1439630_x_at | Sbsn     | 3.276488187 | 5.89E-24 | -1.95  | 6.96E-04 |
| 1419554_at   | Cd47     | 3.283109764 | 6.67E-24 | -2.21  | 8.56E-05 |
| 1427348_at   | Zc3h12a  | 3.493801114 | 7.31E-24 | -2.76  | 5.32E-06 |
| 1460251_at   | Fas      | 3.509398795 | 1.28E-23 | -1.62  | 1.22E-03 |
| 1415989_at   | Vcam1    | 3.317305747 | 1.59E-23 | -1.85  | 1.95E-02 |
| 1415996_at   | Txnip    | 3.230539869 | 1.91E-23 | -1.62  | 1.09E-03 |
| 1433699_at   | Tnfaip3  | 3.405140803 | 4.86E-23 | -2.30  | 3.88E-03 |
| 1419647_a_at | Ier3     | 3.160804104 | 1.40E-22 | -2.07  | 8.10E-05 |
| 1449314_at   | Zfpm2    | 4.219459365 | 1.85E-22 | -1.83  | 4.11E-04 |
| 1418422_at   | Serpib9g | 3.653921853 | 2.69E-22 | -12.86 | 2.55E-08 |
| 1427285_s_at | Malat1   | 3.135074219 | 7.36E-22 | -1.56  | 4.58E-03 |
| 1427429_at   | Csf2     | 3.579544042 | 1.03E-21 | -9.84  | 7.56E-07 |
| 1440739_at   | Vegfc    | 3.58643603  | 1.63E-21 | -4.66  | 1.01E-03 |
| 1448228_at   | Lox      | 2.963299289 | 5.83E-21 | -2.22  | 2.23E-04 |
| 1417256_at   | Mmp13    | 4.06149824  | 8.99E-21 | -23.34 | 5.46E-07 |
| 1416121_at   | Lox      | 2.953099588 | 1.12E-20 | -2.12  | 7.35E-04 |
| 1427515_at   | Pion     | 2.954619756 | 1.26E-20 | -1.89  | 1.87E-04 |
| 1419431_at   | Ereg     | 2.92144614  | 1.34E-20 | -1.69  | 3.28E-04 |
| 1428187_at   | Cd47     | 3.016854668 | 1.77E-20 | -2.28  | 5.43E-05 |
| 1447839_x_at | Adm      | 2.965877499 | 2.74E-20 | -1.97  | 7.54E-04 |
| 1452141_a_at | Sepp1    | 2.896454011 | 1.03E-19 | -2.16  | 2.22E-04 |
| 1419417_at   | Vegfc    | 3.353473469 | 1.97E-19 | -4.94  | 1.05E-03 |
| 1419208_at   | Map3k8   | 2.86193876  | 2.25E-19 | -2.46  | 1.16E-05 |
| 1449310_at   | Ptger2   | 2.96390756  | 2.87E-19 | -2.50  | 2.83E-05 |
| 1427005_at   | Plk2     | 2.833903759 | 1.19E-18 | -1.51  | 1.19E-03 |
| 1435749_at   | Gda      | 2.843704638 | 1.58E-18 | -2.76  | 3.82E-03 |
| 1416527_at   | Rab32    | 2.75645287  | 1.74E-18 | -1.62  | 3.18E-03 |



|              |               |             |          |        |          |
|--------------|---------------|-------------|----------|--------|----------|
| 1439766_x_at | Vegfc         | 3.207557089 | 2.13E-18 | -4.15  | 6.38E-04 |
| 1420603_s_at | NA            | 2.732433908 | 2.33E-18 | -1.76  | 9.25E-04 |
| 1435120_at   | NA            | 2.924846431 | 2.51E-18 | -1.56  | 1.66E-03 |
| 1438035_at   | Fam82a1       | 2.721558816 | 4.25E-18 | -1.71  | 9.14E-04 |
| 1429987_at   | 9930013L23Rik | 2.754414437 | 4.67E-18 | -2.59  | 7.98E-04 |
| 1419427_at   | Csf3          | 3.279469925 | 7.32E-18 | -2.53  | 3.68E-04 |
| 1435748_at   | Gda           | 2.644402631 | 1.66E-17 | -2.91  | 6.62E-04 |
| 1417634_at   | Sod3          | 2.623841275 | 2.25E-17 | -1.89  | 7.94E-03 |
| 1417789_at   | Ccl11         | 2.931640699 | 2.39E-17 | -3.11  | 9.73E-03 |
| 1438036_x_at | Fam82a1       | 2.742754588 | 2.54E-17 | -1.70  | 1.02E-03 |
| 1419537_at   | Tcfec         | 3.000488151 | 5.81E-17 | -1.70  | 1.74E-03 |
| 1427086_at   | Slit3         | 2.571371555 | 8.24E-17 | -2.32  | 4.23E-04 |
| 1423278_at   | Ptprk         | 2.534689762 | 1.32E-16 | -1.52  | 8.25E-03 |
| 1438097_at   | Rab20         | 2.609148622 | 1.48E-16 | -2.05  | 8.56E-05 |
| 1417516_at   | Ddit3         | 2.547382788 | 1.88E-16 | -1.60  | 4.11E-04 |
| 1420394_s_at | NA            | 2.977636571 | 3.00E-16 | -5.21  | 6.74E-06 |
| 1422573_at   | Ampd3         | 2.798529698 | 3.23E-16 | -3.03  | 5.32E-06 |
| 1456590_x_at | Akr1b3        | 2.557309679 | 4.43E-16 | -1.66  | 3.86E-03 |
| 1425398_at   | NA            | 2.494879589 | 1.36E-15 | -2.06  | 5.30E-03 |
| 1451314_a_at | Vcam1         | 2.528567438 | 2.34E-15 | -3.00  | 1.00E-03 |
| 1429352_at   | Mocos         | 2.433416905 | 2.35E-15 | -1.74  | 3.20E-04 |
| 1420380_at   | Ccl2          | 2.409175546 | 4.61E-15 | -2.35  | 3.31E-05 |
| 1424683_at   | Fam134b       | 2.379803831 | 1.27E-14 | -2.10  | 1.04E-04 |
| 1428942_at   | Mt2           | 2.366792569 | 1.46E-14 | -2.47  | 6.42E-05 |
| 1435462_at   | Plcx2         | 2.40387773  | 1.80E-14 | -1.76  | 3.12E-03 |
| 1426604_at   | Rnasel        | 2.444577859 | 2.67E-14 | -1.57  | 1.00E-03 |
| 1448239_at   | Hmox1         | 2.325107506 | 3.92E-14 | -2.49  | 9.15E-05 |
| 1424076_at   | Gdpd1         | 2.379990024 | 4.81E-14 | -1.64  | 4.11E-04 |
| 1427844_a_at | Cebpb         | 2.293708891 | 7.58E-14 | -49.32 | 2.37E-08 |
| 1421267_a_at | Cited2        | 2.404275231 | 1.24E-13 | -1.60  | 1.36E-03 |
| 1434302_at   | Raph1         | 2.265867287 | 1.49E-13 | -1.96  | 6.98E-05 |
| 1417023_a_at | Fabp4         | 2.376673166 | 1.66E-13 | -3.07  | 1.63E-05 |
| 1424938_at   | Steap1        | 2.303080574 | 1.98E-13 | -2.21  | 2.07E-04 |
| 1437133_x_at | Akr1b3        | 2.254582472 | 5.55E-13 | -1.57  | 5.33E-03 |
| 1417273_at   | Pdk4          | 2.217886387 | 6.26E-13 | -4.28  | 4.16E-06 |
| 1425525_a_at | P2rx4         | 2.221179664 | 7.85E-13 | -1.54  | 7.22E-04 |
| 1420654_a_at | Gbe1          | 2.209159109 | 9.50E-13 | -1.82  | 2.56E-04 |
| 1451532_s_at | Steap1        | 2.206107062 | 1.07E-12 | -1.86  | 1.24E-03 |
| 1449984_at   | Cxcl2         | 2.714801527 | 1.81E-12 | -13.83 | 1.16E-06 |
| 1449965_at   | Mcpt8         | 2.218816435 | 1.96E-12 | -2.88  | 4.37E-06 |
| 1419309_at   | Pdpn          | 2.17210238  | 2.40E-12 | -1.61  | 6.84E-04 |
| 1455324_at   | Plcx2         | 2.172430761 | 3.78E-12 | -1.72  | 5.07E-03 |
| 1422317_a_at | Il1rl1        | 2.143784547 | 3.89E-12 | -1.59  | 2.30E-03 |
| 1436405_at   | Dock4         | 2.151023487 | 5.41E-12 | -1.52  | 4.86E-03 |
| 1421291_at   | Il18rap       | 2.133478703 | 1.05E-11 | -1.69  | 6.99E-03 |
| 1418936_at   | Maff          | 2.191310068 | 1.80E-11 | -2.02  | 4.11E-05 |
| 1420450_at   | Mmp10         | 2.170662525 | 2.02E-11 | -1.56  | 6.64E-03 |
| 1427364_a_at | Odc1          | 2.090508492 | 2.23E-11 | -2.30  | 1.61E-04 |
| 1456545_at   | Il18rap       | 2.056414695 | 9.12E-11 | -1.64  | 2.94E-03 |
| 1428636_at   | Steap2        | 2.031850136 | 1.40E-10 | -2.66  | 2.80E-04 |
| 1428919_at   | Fgfr1op       | 2.030619943 | 2.02E-10 | -2.00  | 7.23E-05 |
| 1424077_at   | Gdpd1         | 2.039116477 | 2.84E-10 | -1.61  | 3.59E-04 |
| 1435596_at   | Pion          | 2.022919972 | 3.16E-10 | -2.02  | 1.18E-04 |
| 1435640_x_at | A130040M12Rik | 2.108491437 | 4.65E-10 | -1.77  | 7.21E-03 |
| 1430997_at   | Cd47          | 2.070201923 | 6.20E-10 | -2.26  | 3.07E-04 |

|              |          |             |          |        |          |
|--------------|----------|-------------|----------|--------|----------|
| 1448306_at   | Nfkbia   | 1.950289632 | 1.16E-09 | -2.62  | 2.12E-05 |
| 1422474_at   | Pde4b    | 1.954144929 | 2.17E-09 | -2.27  | 1.23E-04 |
| 1434303_at   | Raph1    | 1.918283168 | 2.36E-09 | -1.88  | 1.10E-04 |
| 1435872_at   | Pim1     | 2.070027846 | 2.76E-09 | -1.76  | 6.60E-04 |
| 1450971_at   | Gadd45b  | 1.927182625 | 2.79E-09 | -1.53  | 2.01E-03 |
| 1422473_at   | Pde4b    | 1.937664628 | 3.62E-09 | -2.26  | 3.06E-04 |
| 1425145_at   | I1rl1    | 1.902192024 | 4.46E-09 | -1.50  | 1.10E-02 |
| 1426405_at   | Rnf11    | 1.893059636 | 6.42E-09 | -1.83  | 3.16E-04 |
| 1426619_at   | Aim2     | 1.91019136  | 8.18E-09 | -1.77  | 2.67E-03 |
| 1450744_at   | Ell2     | 1.879610984 | 1.12E-08 | -1.53  | 6.88E-04 |
| 1438157_s_at | Nfkbia   | 1.859053569 | 1.58E-08 | -2.26  | 4.29E-05 |
| 1427381_at   | Irg1     | 2.056552529 | 1.59E-08 | -1.60  | 1.57E-02 |
| 1449731_s_at | Nfkbia   | 1.855151785 | 2.02E-08 | -2.64  | 2.50E-05 |
| 1455393_at   | Cp       | 1.839794028 | 2.47E-08 | -4.18  | 8.29E-06 |
| 1417813_at   | Ikbke    | 1.830792329 | 4.01E-08 | -3.07  | 5.79E-06 |
| 1449450_at   | Ptges    | 1.826312443 | 4.20E-08 | -1.71  | 5.24E-04 |
| 1415899_at   | Junb     | 1.807079697 | 6.25E-08 | -1.64  | 1.49E-03 |
| 1417045_at   | Bid      | 1.799010947 | 1.05E-07 | -1.83  | 1.22E-04 |
| 1419758_at   | Abcb1a   | 1.807653552 | 1.11E-07 | -1.97  | 5.26E-03 |
| 1420088_at   | Nfkbia   | 1.785753416 | 1.24E-07 | -1.91  | 1.26E-04 |
| 1419132_at   | Tlr2     | 1.781490594 | 1.43E-07 | -1.77  | 5.06E-04 |
| 1452058_a_at | Rnf11    | 1.801676148 | 1.46E-07 | -1.72  | 2.73E-04 |
| 1449773_s_at | Gadd45b  | 1.765923686 | 2.68E-07 | -1.68  | 5.63E-04 |
| 1434144_s_at | Wdyhv1   | 1.754705877 | 3.22E-07 | -2.06  | 2.76E-04 |
| 1417750_a_at | Slc25a37 | 1.743577075 | 4.64E-07 | -1.58  | 1.33E-03 |
| 1446071_at   | Steap2   | 1.73838801  | 4.96E-07 | -3.80  | 4.61E-05 |
| 1438773_at   | Steap2   | 1.739668678 | 5.31E-07 | -3.67  | 2.23E-05 |
| 1450826_a_at | Saa3     | 1.742644203 | 5.57E-07 | -70.87 | 3.72E-09 |
| 1420741_x_at | Lce1i    | 1.747945358 | 9.17E-07 | -2.21  | 5.06E-04 |
| 1444290_at   | Steap2   | 1.712447126 | 1.12E-06 | -4.07  | 2.83E-05 |
| 1451263_a_at | Fabp4    | 1.738816449 | 1.16E-06 | -2.49  | 8.60E-05 |
| 1432489_a_at | Wdyhv1   | 1.721970432 | 1.33E-06 | -2.38  | 2.95E-04 |
| 1428083_at   | Neat1    | 1.707125358 | 1.38E-06 | -1.63  | 6.25E-03 |
| 1439747_at   | Ptges    | 1.705504531 | 1.66E-06 | -1.68  | 7.74E-04 |
| 1427689_a_at | Tnfp1    | 1.690586008 | 2.21E-06 | -1.55  | 1.57E-03 |
| 1421228_at   | Ccl7     | 1.678419154 | 2.54E-06 | -4.27  | 1.16E-06 |
| 1417495_x_at | Cp       | 1.682953117 | 2.80E-06 | -5.29  | 5.79E-06 |
| 1424456_at   | Pvrl2    | 1.68772016  | 3.26E-06 | -1.59  | 2.00E-03 |
| 1450829_at   | Tnfaip3  | 1.662575656 | 3.65E-06 | -1.81  | 3.48E-03 |
| 1449449_at   | Ptges    | 1.641609999 | 7.53E-06 | -1.95  | 3.60E-04 |
| 1417496_at   | Cp       | 1.634275056 | 1.24E-05 | -6.13  | 2.91E-06 |
| 1426404_a_at | Rnf11    | 1.610586411 | 1.56E-05 | -1.73  | 1.97E-04 |
| 1437119_at   | Ern1     | 1.601777147 | 2.03E-05 | -1.53  | 1.08E-03 |
| 1424659_at   | Slit2    | 1.611116625 | 2.17E-05 | -2.34  | 1.36E-03 |
| 1417220_at   | Fah      | 1.5970978   | 2.50E-05 | -1.75  | 3.63E-03 |
| 1442878_at   | Prdx6    | 1.600719879 | 2.50E-05 | -1.59  | 4.62E-03 |
| 1435458_at   | Pim1     | 1.628307106 | 2.69E-05 | -1.55  | 2.04E-03 |
| 1421117_at   | Dst      | 1.621513676 | 2.89E-05 | -1.60  | 2.94E-03 |
| 1417816_s_at | Serinc3  | 1.587198003 | 3.32E-05 | -1.56  | 8.79E-04 |
| 1448734_at   | Cp       | 1.591439467 | 3.47E-05 | -7.86  | 1.18E-06 |
| 1449006_at   | Gla      | 1.61501644  | 3.50E-05 | -2.59  | 6.98E-05 |
| 1448318_at   | Plin2    | 1.587007493 | 3.61E-05 | -1.80  | 5.32E-04 |
| 1419012_at   | Zfpm2    | 1.616610032 | 4.37E-05 | -1.87  | 2.37E-04 |
| 1435137_s_at | NA       | 1.567596568 | 5.39E-05 | -1.52  | 4.44E-03 |
| 1424697_at   | Dtwd1    | 1.564220521 | 6.25E-05 | -1.66  | 4.05E-04 |

|              |               |             |          |       |          |
|--------------|---------------|-------------|----------|-------|----------|
| 1442048_at   | Rnf11         | 1.560306469 | 6.63E-05 | -1.84 | 1.21E-04 |
| 1442359_at   | Steap2        | 1.559272978 | 7.12E-05 | -2.95 | 5.41E-05 |
| 1418248_at   | Gla           | 1.562963481 | 7.27E-05 | -2.43 | 2.71E-05 |
| 1448560_at   | Bid           | 1.559074019 | 7.78E-05 | -1.59 | 1.82E-03 |
| 1437419_at   | Bmp2k         | 1.554333772 | 9.66E-05 | -2.18 | 2.79E-04 |
| 1420089_at   | Nfkbia        | 1.555014952 | 1.20E-04 | -2.47 | 2.71E-05 |
| 1434537_at   | Slco3a1       | 1.541000994 | 1.22E-04 | -3.22 | 7.00E-05 |
| 1437284_at   | Fzd1          | 1.529976563 | 1.70E-04 | -1.72 | 6.36E-04 |
| 1455186_a_at | 1190003J15Rik | 1.50340229  | 3.31E-04 | -1.51 | 3.33E-02 |
| 1431786_s_at | 1190003J15Rik | 1.520929441 | 3.80E-04 | -1.80 | 1.16E-03 |

Table S1g. C/EBPβ-3T3<sup>RasV12</sup> vs. 3T3<sup>RasV12</sup> and *Cebpg*<sup>-/-</sup> vs. WT MEFs and *Cebpb*<sup>-/-</sup>/Ras<sup>V12</sup> vs. WT/Ras<sup>V12</sup> MEFs. (59 probes)

| Probe ID     | Gene    | Fold Change | p-value  | Fold Change | p-value  | Fold Change | p-value  |
|--------------|---------|-------------|----------|-------------|----------|-------------|----------|
| 1416077_at   | Adm     | 4.83        | 3.63E-34 | 3.55        | 1.83E-05 | 0.51        | 1.19E-03 |
| 1447839_x_at | Adm     | 2.97        | 2.74E-20 | 3.64        | 6.19E-05 | 0.51        | 7.54E-04 |
| 1422573_at   | Ampd3   | 2.80        | 3.23E-16 | 5.63        | 2.33E-05 | 0.33        | 5.32E-06 |
| 1416239_at   | Ass1    | 8.48        | 3.26E-43 | 1.60        | 1.73E-02 | 0.39        | 2.54E-05 |
| 1420380_at   | Ccl2    | 2.41        | 4.61E-15 | 2.63        | 6.80E-03 | 0.42        | 3.31E-05 |
| 1421267_a_at | Cited2  | 2.40        | 1.24E-13 | 1.58        | 1.15E-02 | 0.63        | 1.36E-03 |
| 1420804_s_at | Clec4d  | 5.73        | 4.39E-39 | 5.57        | 1.11E-02 | 0.65        | 1.80E-03 |
| 1453092_at   | Crct1   | 10.76       | 1.27E-43 | 3.51        | 5.86E-04 | 0.22        | 1.21E-05 |
| 1419209_at   | Cxcl1   | 82.21       | 3.26E-82 | 4.68        | 9.28E-03 | 0.05        | 4.11E-05 |
| 1457644_s_at | Cxcl1   | 33.21       | 6.07E-66 | 2.65        | 2.91E-02 | 0.07        | 2.23E-05 |
| 1419728_at   | Cxcl5   | 37.31       | 1.06E-73 | 5.51        | 1.99E-02 | 0.11        | 3.01E-03 |
| 1424697_at   | Dtwd1   | 1.56        | 6.25E-05 | 1.59        | 5.79E-04 | 0.60        | 4.05E-04 |
| 1419431_at   | Ereg    | 2.92        | 1.34E-20 | 2.44        | 1.81E-04 | 0.59        | 3.28E-04 |
| 1424683_at   | Fam134b | 2.38        | 1.27E-14 | 2.23        | 3.88E-02 | 0.48        | 1.04E-04 |
| 1438405_at   | Fgf7    | 3.38        | 1.56E-24 | 1.77        | 8.52E-03 | 0.49        | 2.99E-04 |
| 1422243_at   | Fgf7    | 3.78        | 8.69E-28 | 1.65        | 2.98E-02 | 0.46        | 4.06E-04 |
| 1435749_at   | Gda     | 2.84        | 1.58E-18 | 1.83        | 4.40E-03 | 0.36        | 3.82E-03 |
| 1435748_at   | Gda     | 2.64        | 1.66E-17 | 1.58        | 1.64E-02 | 0.34        | 6.62E-04 |
| 1418248_at   | Gla     | 1.56        | 7.27E-05 | 1.57        | 1.01E-03 | 0.41        | 2.71E-05 |
| 1416592_at   | Glrx    | 4.25        | 8.86E-31 | 2.77        | 5.86E-05 | 0.50        | 1.40E-04 |
| 1416593_at   | Glrx    | 4.62        | 2.61E-33 | 2.97        | 9.51E-05 | 0.48        | 7.71E-05 |
| 1448239_at   | Hmox1   | 2.33        | 3.92E-14 | 6.63        | 2.06E-06 | 0.40        | 9.15E-05 |
| 1419647_a_at | Ier3    | 3.16        | 1.40E-22 | 1.72        | 5.85E-04 | 0.48        | 8.10E-05 |
| 1425145_at   | Il1rl1  | 1.90        | 4.46E-09 | 2.17        | 1.34E-04 | 0.67        | 1.10E-02 |
| 1422317_a_at | Il1rl1  | 2.14        | 3.89E-12 | 2.05        | 3.85E-03 | 0.63        | 2.30E-03 |
| 1429060_at   | Malat1  | 5.96        | 9.40E-40 | 1.72        | 1.49E-02 | 0.62        | 1.41E-02 |
| 1449965_at   | Mcpt8   | 2.22        | 1.96E-12 | 6.76        | 9.89E-05 | 0.35        | 4.37E-06 |
| 1415897_a_at | Mgst1   | 5.40        | 5.06E-37 | 1.82        | 1.98E-02 | 0.35        | 8.21E-06 |
| 1420450_at   | Mmp10   | 2.17        | 2.02E-11 | 2.32        | 1.64E-03 | 0.64        | 6.64E-03 |
| 1417256_at   | Mmp13   | 4.06        | 8.99E-21 | 22.45       | 2.07E-05 | 0.04        | 5.46E-07 |
| 1429352_at   | Mocos   | 2.43        | 2.35E-15 | 1.56        | 4.55E-03 | 0.57        | 3.20E-04 |
| 1428942_at   | Mt2     | 2.37        | 1.46E-14 | 5.61        | 2.71E-06 | 0.40        | 6.42E-05 |
| 1435137_s_at | NA      | 1.57        | 5.39E-05 | 1.51        | 3.25E-02 | 0.66        | 4.44E-03 |
| 1428083_at   | Neat1   | 1.71        | 1.38E-06 | 1.85        | 5.48E-03 | 0.62        | 6.25E-03 |
| 1448306_at   | Nfkbia  | 1.95        | 1.16E-09 | 1.60        | 3.84E-03 | 0.38        | 2.12E-05 |
| 1417273_at   | Pdk4    | 2.22        | 6.26E-13 | 2.24        | 4.72E-04 | 0.23        | 4.16E-06 |
| 1419309_at   | Pdpn    | 2.17        | 2.40E-12 | 2.08        | 4.70E-04 | 0.62        | 6.84E-04 |
| 1455324_at   | Plcx2   | 2.17        | 3.78E-12 | 1.80        | 3.56E-04 | 0.58        | 5.07E-03 |
| 1435462_at   | Plcx2   | 2.40        | 1.80E-14 | 1.73        | 4.27E-04 | 0.57        | 3.12E-03 |
| 1448749_at   | Plek    | 6.39        | 1.08E-41 | 2.64        | 2.75E-02 | 0.61        | 5.30E-03 |
| 1448748_at   | Plek    | 7.75        | 1.50E-45 | 3.49        | 2.92E-02 | 0.62        | 6.26E-03 |
| 1448318_at   | Plin2   | 1.59        | 3.61E-05 | 1.56        | 2.50E-02 | 0.56        | 5.32E-04 |
| 1449450_at   | Ptges   | 1.83        | 4.20E-08 | 2.82        | 9.64E-05 | 0.59        | 5.24E-04 |
| 1439747_at   | Ptges   | 1.71        | 1.66E-06 | 3.38        | 2.31E-04 | 0.59        | 7.74E-04 |
| 1449449_at   | Ptges   | 1.64        | 7.53E-06 | 2.32        | 5.95E-04 | 0.51        | 3.60E-04 |
| 1417263_at   | Ptgs2   | 6.98        | 3.39E-43 | 1.92        | 1.05E-02 | 0.43        | 8.50E-05 |
| 1438097_at   | Rab20   | 2.61        | 1.48E-16 | 1.70        | 3.67E-03 | 0.49        | 8.56E-05 |
| 1416527_at   | Rab32   | 2.76        | 1.74E-18 | 2.06        | 9.64E-04 | 0.62        | 3.18E-03 |
| 1426604_at   | Rnasel  | 2.44        | 2.67E-14 | 1.76        | 9.93E-03 | 0.64        | 1.00E-03 |
| 1450826_a_at | Saa3    | 1.74        | 5.57E-07 | 3.35        | 1.00E-02 | 0.01        | 3.72E-09 |

|              |         |       |          |      |          |      |          |
|--------------|---------|-------|----------|------|----------|------|----------|
| 1459897_a_at | Sbsn    | 3.41  | 5.27E-25 | 2.01 | 3.72E-03 | 0.47 | 1.34E-03 |
| 1439630_x_at | Sbsn    | 3.28  | 5.89E-24 | 2.02 | 5.92E-03 | 0.51 | 6.96E-04 |
| 1429348_at   | Sema3c  | 5.12  | 1.04E-35 | 2.33 | 9.92E-04 | 0.65 | 2.28E-03 |
| 1452141_a_at | Sepp1   | 2.90  | 1.03E-19 | 2.65 | 9.78E-03 | 0.46 | 2.22E-04 |
| 1417816_s_at | Serinc3 | 1.59  | 3.32E-05 | 1.54 | 4.76E-03 | 0.64 | 8.79E-04 |
| 1420641_a_at | Sqrdl   | 4.25  | 2.77E-31 | 2.16 | 9.79E-04 | 0.66 | 7.26E-03 |
| 1448529_at   | Thbd    | 3.36  | 3.17E-24 | 2.14 | 2.17E-04 | 0.54 | 8.48E-05 |
| 1419132_at   | Tlr2    | 1.78  | 1.43E-07 | 1.57 | 2.71E-02 | 0.56 | 5.06E-04 |
| 1460667_at   | U90926  | 65.84 | 8.41E-81 | 4.57 | 4.70E-04 | 0.64 | 3.44E-02 |
