# Supplementary material
Source: PubMed Central journal article supplement (PMC3753923)
Supplement: MCB.01674-12_zmb999100077so3.pdf [file MCB.01674-12_zmb999100077so3.pdf]

**Table 2a.** Unique gene set for C/EBP $\beta$ -  
3T3<sup>RasV12</sup> vs. 3T3Ras<sup>V12</sup>. (547 genes)

**GeneSymbol**

1100001G20Rik  
1110008P14Rik  
1700012D01Rik  
1700026D08Rik  
1810032O08Rik  
1810033B17Rik  
2010004M13Rik  
2010005H15Rik  
2010107H07Rik  
2310005G13Rik  
2400009B08Rik  
2410006H16Rik  
2500002B13Rik  
2610305J24Rik  
2700007P21Rik  
2700038G22Rik  
2810474O19Rik  
3110027N22Rik  
3110039M20Rik  
3110082D06Rik  
4930420K17Rik  
4930519F16Rik  
4930525G20Rik  
5730469M10Rik  
5730508B09Rik  
6330409N04Rik  
6330415G19Rik  
6330416G13Rik  
9030619P08Rik  
9130204L05Rik  
9530053H05Rik  
A630033H20Rik  
A930007D18Rik  
Abcc1  
Abcd2  
Abhd5  
Acad11  
Acs11  
Acs14  
Adam12  
Adamts5  
Adh7

Ahr  
AI043046  
AI503316  
AI607873  
Aicda  
Ak2  
Akr1c21  
Aldh3a1  
Alox5ap  
Amigo2  
Amn1  
Angpt1  
Ankra2  
Ankrd1  
Antxr1  
Anxa3  
Aox1  
Ap1s2  
Apbb3  
Aplp2  
Apobr  
App  
Arhgap29  
Arhgef6  
Arid5b  
Arl5b  
Arnt2  
Atg12  
Atp10d  
Atp11b  
Atp1a3  
Atp1b1  
Atp6v0a1  
Atp7a  
Atp8b4  
AW987390  
B230217C12Rik  
Baz2b  
BC013529  
BC022960  
BC023829  
BC024659  
BC026600  
Bcl2l11  
Bdkrb1  
Bmper  
Bmpr1a

Bnip3l  
Brp44  
Bst1  
Btg2  
Btla  
C730049O14Rik  
Cacna2d1  
Cacna2d3  
Calcr1  
Car2  
Car6  
Casp1  
Ccdc19  
Ccdc58  
Ccdc80  
Ccnd2  
Ccng2  
Ccno  
Ccrn4l  
Cd1d1  
Cd24a  
Cd302  
Cd33  
Cdadc1  
Cdc42ep3  
Cdh11  
Cdh17  
Cdkn2c  
Celsr1  
Cept1  
Cerk  
Chac1  
Chi3l1  
Chst12  
Clec4e  
Col12a1  
Col18a1  
Col3a1  
Col4a1  
Col5a1  
Col5a2  
Col5a3  
Col7a1  
Col8a1  
Colec12  
Cox8c  
Cpeb3

Cpeb4  
Cpne8  
Crispld1  
Cry2  
Csprs  
Cstb  
Ctgf  
Cth  
Ctsk  
Cxcl10  
Cyp1b1  
Cyp26b1  
D16Ertd472e  
Dact1  
Dbc1  
Dcbld1  
Dcbld2  
Ddah1  
Ddit4  
Ddx18  
Degs1  
Dgat1  
Dgat2  
Dhrs1  
Dio2  
Dmrtc1a  
Dnajb9  
Dnmt3a  
Dnmt3l  
Dpep1  
Dppa2  
Dram2  
Dsel  
Dtx4  
Dusp16  
E030016H06Rik  
E230013L22Rik  
Ear11  
Ear2  
Ear3  
Egfr  
Egr1  
Egr2  
Elavl1  
Emilin2  
Epgn  
Ets2

Ext1  
F3  
F5  
F7  
Fabp5  
Fabp7  
Fam107b  
Fam110c  
Fam161a  
Fam162a  
Fam5c  
Fat4  
Fbxl20  
Fbxl5  
Fbxo32  
Fchsd2  
Fetub  
Fgf10  
Fgf2  
Filip1l  
Flrt2  
Fn1  
Fndc3b  
Fos  
Fosl2  
Foxo3  
Foxp1  
Frrs1  
Fst  
Fstl1  
Fzd7  
Gabarapl1  
Gadd45a  
Galnt13  
Gcnt2  
Gjb4  
Glipr2  
Gm14005  
Gm3715  
Gm4354  
Gnb5  
Gng12  
Gng8  
Gnptab  
Gopc  
Gpcpd1  
Gpr153

Gpr155  
Gpr176  
Gpr35  
Gpr84  
Gramd3  
Grem2  
Grhl1  
Grina  
Gzf1  
H2afj  
H47  
H60c  
H6pd  
Hao1  
Has2  
Haus2  
Hbegf  
Hbp1  
Hectd2  
Hgf  
Hipk2  
Hist1h1c  
Hist1h2bc  
Hist1h2bp  
Hist1h4h  
Hist2h2bb  
Hist2h3c1  
Hmg20a  
Hnrnpa1  
Hsd11b1  
Id3  
Id4  
Ifi202b  
Ifi204  
Ifnar2  
Ifrd1  
Iglv1  
Il10rb  
Il12b  
Il13ra1  
Il1b  
Il1rl2  
Il33  
Inhba  
Ipmk  
Ism1  
Itfg3

Itga8  
Itgb2  
Itgb5  
Itgb8  
Kazald1  
Kcnk10  
Kdm5a  
Klf6  
Klf7  
Klf9  
Klhl24  
Klk6  
Krt23  
Lamp2  
Lass6  
Lce3a  
Lce3c  
Lcp2  
Lef1  
Lgals9  
Lhfp12  
Lmo4  
LOC664787  
Lpcat3  
Lpgat1  
Lphn2  
Lrrc57  
Lrrk2  
Ltbp2  
Ly75  
Lyst  
Mab21l1  
Mansc1  
Map3k5  
Mapk8ip3  
Mar7  
Mark1  
Mcf2l  
Me1  
Mep1a  
Metrnl  
Mfap3l  
Mfap5  
Mir17hg  
Mllt11  
Mlxip  
Mmp19

Mmp2  
Mospd1  
Mrap  
Mreg  
Mst1  
Mt4  
Mtap6  
Mtap9  
Mtm1  
Mtpn  
Mxd4  
Myc  
Myl4  
Mylk  
Myo1b  
Naaa  
Naip2  
Naip5  
Napb  
Ncf4  
Nedd9  
Neu2  
Nfil3  
Niacr1  
Nid1  
Nnmt  
Nol4  
Npc2  
Nppb  
Nrg1  
Nts  
Nuak1  
Nudt6  
Nus1  
Oit3  
P2rx7  
Pak3  
Panx3  
Pard3  
Pbx1  
Pcx  
Pcdcd4  
Pde4d  
Pde6h  
Pdgfrl  
Per2  
Pfkfb4



Pfkp  
Phyh  
Pi15  
Pi16  
Pik3r5  
Pim3  
Pip5k1a  
Pitpnc1  
Pla1a  
Pla2g4a  
Plaur  
Plice1  
Pld1  
Pld4  
Plekhg1  
Por  
Ppap2a  
Ppp1r15a  
Prdx5  
Prkcd  
Prkd1  
Prkx  
Prl3d1  
Prl7b1  
Pros1  
Prrx1  
Prss12  
Ptgir  
Ptplb  
Ptpn5  
Pvr  
Rab38  
Rab3c  
Rabgap1l  
Ralgapa2  
Rap1gap2  
Rassf1  
Rassf3  
Rbm12b  
Rbm3  
Rbpms  
Rdh11  
Rdh12  
Rel  
Retn  
Retnla  
Retnlb

Rffl  
Rhbf2  
Ripk2  
Rnase4  
Rnd3  
Rnf125  
Rnf149  
Rnf182  
Rras  
Rrbp1  
Rtn4  
Runx1t1  
S100a13  
S100a16  
S100a9  
S1pr1  
Samsn1  
Sash1  
Sdc4  
Sema4a  
Serf1  
Serpina1a  
Serpib1a  
Serpib1b  
Serpine1  
Serpini1  
Sgms1  
Sh3bp5  
Siglecg  
Skil  
Slc10a6  
Slc11a1  
Slc12a2  
Slc16a9  
Slc20a1  
Slc23a2  
Slc24a1  
Slc2a6  
Slc35b2  
Slc39a6  
Slc3a2  
Slc4a4  
Slc7a11  
Slc7a7  
Sfn1  
Sfn4  
Smad6

Smox  
Snord104  
Snord89  
Sntb2  
Snx14  
Snx18  
Snx7  
Socs2  
Sod2  
Sorbs1  
Spata9  
Sphk1  
Spin4  
Sprr1a  
Sprr1b  
Sprr2i  
Sprr2j-ps  
Sprr2k  
Spry1  
Spry3  
Spry4  
Sptlc2  
Spty2d1  
Srgap3  
Srgn  
Ssbp2  
Stambpl1  
Stard5  
Stat3  
Stc1  
Stfa3  
Stk38l  
Stra6  
Sulf2  
Svep1  
Taf7  
Tbx18  
Tcam1  
Tcp11l2  
Thbs1  
Thbs2  
Tiam1  
Timp1  
Tlr4  
Tlr7  
Tm4sf1  
Tmem106b

Tmem119  
Tmem170b  
Tmem45a  
Tmem53  
Tmem63a  
Tmem86a  
Tmem87b  
Tmigd1  
Tmx4  
Tnc  
Tnfaip8  
Tns4  
Tob1  
Traf3ip2  
Trib2  
Trim11  
Trp53inp2  
Ttc39b  
Tubb2a  
Uba5  
Ugp2  
Vcan  
Vsig8  
Wdr45  
Xpnpep2  
Xpr1  
Ypel2  
Zbtb34  
Zeb2  
Zfp281  
Zfp287  
Zfp697  
Znrf1  
Zranb3  
Zswim6

Table 2b. Unique gene set for *Cebpg*<sup>-/-</sup> vs.  
WT – MEFs. (328 genes)

**GeneSymbol**

1110020G09Rik  
1700007K13Rik  
1700008J07Rik  
2010204K13Rik  
2200002D01Rik  
2310002L13Rik  
2410076I21Rik  
2810432L12Rik  
4833427G06Rik  
4930506M07Rik  
5031425E22Rik  
5430435G22Rik  
9030624J02Rik  
9230114K14Rik  
A830007P12Rik  
Adam8  
Adrb2  
Adssl1  
Afp  
Ahrr  
A1662270  
Akap1  
Angptl4  
Ankrd24  
Ankrd28  
Ankrd37  
Ano1  
Ano3  
Anxa8  
Apod  
ApoE  
Aqp1  
Arap2  
Areg  
Arf6  
Atp6v1b2  
B230118H07Rik  
Baiap211  
BC022687  
Bdnf  
Bex1  
Blvrb

Bscl2  
Btbd11  
C3ar1  
Cadm1  
Camk1d  
Car13  
Ccdc93  
Ccl5  
Ccl6  
Ccl9  
Ccnd1  
Ccny  
Cd200r1  
Cd274  
Cd300lb  
Cd48  
Cd55  
Cd68  
Cd84  
Cdh2  
Cdkn1a  
Cflar  
Cgref1  
Clec4n  
Clec7a  
Clip4  
Cln3  
Cobll1  
Coch  
Col2a1  
Copg2  
Cotl1  
Cpeb2  
Cpt1a  
Crip2  
Cryab  
Cst6  
Ctnnal1  
Ctsb  
Ctsf  
Ctsh  
Cxcr7  
Cyp2j6  
D6Mm5e  
Dab2  
Dcaf4  
Dctn4

Dcxr  
Ddit4l  
Ddx6  
Def6  
Dennd2c  
Dlx2  
Dnajc12  
Dnase1l1  
Dock10  
Dusp10  
Dusp4  
Dyrk3  
Ebi3  
Egln3  
Elovl4  
Enpp2  
Epas1  
Epha2  
Epha7  
Eps8  
Erc2  
Erdr1  
Errfi1  
Esd  
Evi2a  
Fam19a5  
Fam49a  
Fam65b  
Fbxo33  
Fcgr2b  
Fcgr3  
Fcgr4  
Fermt3  
Fgd4  
Fgf5  
Fgfbp3  
Flt4  
Fnip2  
Fosl1  
Foxg1  
Fpr1  
Frmd4b  
Frzb  
Fth1  
Fxyd5  
Galc  
Galm

Gap43  
Gas7  
Gch1  
Gclm  
Ggct  
Gm5124  
Gpr1  
Gpr149  
Gprc5a  
Gprc5b  
Grk5  
Gss  
Gstm1  
Gzmd  
Havcr2  
Hebp1  
Hfe  
Hgsnat  
Hk3  
Hmga2  
Hmga2-ps1  
Hpgds  
Hsd17b11  
Hsd3b7  
Hspa1a  
Hspa1b  
Hspa4l  
Ica1l  
Icam1  
Ifi30  
Ifit2  
Ifit3  
Ifitm6  
Igsf6  
Ikbkg  
Itga6  
Jun  
Kcna1  
Kcnj15  
Kcnn4  
Kdsr  
Kitl  
Klf10  
Klf2  
Klf4  
Klf5  
Klhdc5



Klhl21  
Krt20  
Ldhb  
Lgals3  
Lipa  
Lipg  
Lpxn  
Lrp11  
Lrrc28  
Lrrc33  
Lrrc51  
Mafb  
Marco  
Mbp  
Mertk  
Mettl7a1  
Mff  
Mgat5  
Mgst3  
Mitf  
Mllt3  
Mmd  
Mpzl2  
Mrc1  
Ms4a6b  
Msr1  
Msx2  
Mt1  
Mtmr10  
Myo1f  
Ncam1  
Nceh1  
Nckap1l  
Ndrg1  
Nek3  
Neu1  
Ngf  
Ngfr  
Nipal1  
Npnt  
Nptx1  
Nqo1  
Nrcam  
Nt5e  
Nudt12  
Ogfrl1  
Orai2

Parvb  
Pbp2  
Pcdh20  
Pcdh7  
Pcdh9  
Pcmtd2  
Perp  
Pf4  
Pfn2  
Pgd  
Pid1  
Plp1  
Plxnc1  
Polk  
Ppap2b  
Ppap2c  
Ppp1r3c  
Prkar2b  
Prl3a1  
Pspc1  
Ptp4a3  
Ptprn22  
Ptpr  
Pycard  
Ramp3  
Rassf6  
Repin1  
Rev1  
Rgnef  
Rgs17  
Rps6ka6  
Sap30  
Sdcbp2  
Sdpr  
Sema4f  
Sema7a  
Serpinb9b  
Sertad1  
Sh3bgrl2  
Sh3bp2  
Slc19a2  
Slc1a6  
Slc30a1  
Slc37a2  
Slc40a1  
Smpdl3a  
Smyd4

Sncg  
Sord  
Sox2  
Srxn1  
St3gal6  
St8sia4  
Star  
Stmn2  
Suox  
Swap70  
Taldo1  
Tatdn2  
Tbc1d2  
Tbc1d24  
Tead4  
Thyn1  
Tinagl1  
Tle4  
Tlr13  
Tlr3  
Tmcc3  
Tmem106a  
Tmem140  
Tmem14a  
Tmem200a  
Tmem37  
Tmem74  
Tnfrsf10b  
Tnfrsf21  
Tnfsf9  
Tpd52  
Trim30a  
Tuba4a  
Txnrd1  
Uap1l1  
Ugdh  
Unc5c  
Upp1  
Vapb  
Wdr91  
Wfdc2  
Zdhhc14  
Zdhhc24  
Zfand2a  
Zfp248  
Zfp365  
Zfp52

Zfp874a  
Zfp93  
Znr1as  
Znr2

Table 2c. Unique gene set for *Cebpb*<sup>-/-</sup> /Ras<sup>V12</sup>  
vs. Ras<sup>V12</sup> – MEFs. (233 genes)

**GeneSymbol**

1110028C15Rik  
1810012P15Rik  
2010107G23Rik  
4930583H14Rik  
5730559C18Rik  
6720401G13Rik  
8030451A03Rik  
9130208D14Rik  
A330021E22Rik  
A630038E17Rik  
Abtb2  
Acot1  
Acot2  
Acot4  
A1504432  
A1845619  
Akap17b  
Amotl2  
Amz1  
Apln  
Aplp1  
Aqp3  
Arg2  
Arhgap12  
Arhgef3  
Arl4c  
Arntl2  
Asb5  
Atad1  
Atf5  
Atg16l2  
Atl1  
Atp13a4  
Atp8a1  
Atp9a  
Bcl3  
Bin1  
Btn1a1  
C1ra  
C1s  
C76876  
C77370

Cbr2  
Ccl20  
Cd40  
Cd82  
Cdc42bpg  
Cdk18  
Cdk2ap2  
Cdkn1c  
Cebpd  
Cfh  
Cgnl1  
Ch25h  
Chchd10  
Chrna7  
Clca1  
Cldn3  
Cldn4  
Cndp2  
Cpa4  
Cpped1  
Cxadr  
Cyp2f2  
D4Wsu53e  
D7Erttd715e  
Dach2  
Ddb2  
Ddhd1  
Ddx3y  
Dhrs7  
Dnase2a  
Dpy19l1  
Dsc2  
Dtnb  
Dusp8  
Ebf4  
Eif2s3y  
En1  
Enpp5  
Eomes  
Epb4.1l5  
Epha1  
Epha4  
F11r  
Fam108c  
Fam129a  
Fhit  
Fnip1

Foxred2  
Gabrb1  
Gba  
Gchfr  
Gdf15  
Gdnf  
Gpm6b  
Gpr137b-ps  
Gpr146  
Gpr50  
Gstk1  
Gvin1  
H2-D1  
H2-K1  
H2-L  
H2-Q7  
Hivep1  
Ier5  
Il1r2  
Impact  
Inadl  
Irak3  
Itga3  
Khynyn  
Kif5a  
Klk7  
Klk8  
Lepr  
Lin7a  
Lonrf3  
Lpcat2  
Lpin2  
Macrodl  
Manba  
Maob  
Mar9  
Mar9  
Mcpt1  
Mei4  
Micall2  
Mllt4  
Mmp9  
Mn1  
Ms4a4d  
Mttp  
Mycl1  
Nedd4l

Nfib  
Nfkbie  
Npl  
Nrp2  
Ntf5  
Ntn1  
Nudt11  
Nxt2  
Oplah  
Osgin2  
Otud1  
Ovgp1  
Pabpc1  
Paqr3  
Pawr  
Pcp4  
Pcsk5  
Pgf  
Phf15  
Pip5k1b  
Pisd-ps3  
Pitpnm1  
Plcg2  
Plxdc2  
Ppip5k1  
Prkaa2  
Prl2a1  
Prnd  
Ptgs1  
Ptprd  
Pyhin1  
Rab11fip1  
Rab11fip5  
Rapgef3  
Rassf10  
Rassf5  
Rbp4  
Relb  
Rem2  
Rpl30  
Rps6ka2  
Rad  
Rspo3  
Rspo4  
Serpina3g  
Shroom2  
Slc11a2



Slc12a9  
Slc16a2  
Slc24a3  
Slc25a23  
Slc35f1  
Slc39a8  
Slc7a2  
Slc9a3r1  
Snca  
Snhg11  
Socs3  
Sox7  
Sp5  
Spag1  
Spint2  
Sstr4  
St14  
Stap2  
Steap4  
Stim1  
Stxbp3a  
Sult4a1  
Syng1  
Syt7  
Tchh  
Tifa  
Tjp1  
Tmc7  
Tmem144  
Tmem154  
Tmem176a  
Tmem176b  
Tmem56  
Tmem8  
Tspan11  
Ttc30a2  
Ttll7  
Ttyh1  
Uchl1  
Ugcg  
Uty  
Vstm2a  
Vwc2  
Zfp566  
Zfp599  
Zfp612  
Zfp658

Zfp68  
Zfp7  
Zfp800

Table 2d. Unique gene set common to both  
C/EBP $\beta$ -3T3<sup>RasV12</sup> vs. 3T3<sup>RasV12</sup> and *Cebpg*<sup>-/-</sup>  
vs. WT – MEFs. (61 genes)

**GeneSymbol**

2310016C08Rik

Abca1

Adk

Adora2b

Ak4

Alas1

Apobec1

Arhgdib

Arrdc3

Atf3

Atp6v0e2

Ccl3

Cd14

Cd36

Cd80

Cd93

Chst7

Csf2rb

Cyb5

Cyp4a12a

Dmxl2

Glul

Gm11428

Gsto2

Hist2h3c2-ps

Id1

Lpl

Lyz2

Mapkapk3

Masp1

Mdm2

Mmp3

Nrn1

Obfc2a

Pex11a

Pfkfb3

Pparg

Ppbp

Ppm1h

Prg4

Procr

Ptgr1  
Rab30  
Rgs16  
Rgs2  
Rps6ka5  
Rsb1  
Sat1  
Selp  
Serp1b2  
Serp1e2  
Slc2a1  
Slc2a3  
Slc43a2  
Slco2a1  
Styk1  
Thsd7a  
Tiparp  
Tmem30a  
Trem2  
Trp53inp1

Table 2e. Unique gene set common to both  
C/EBPβ-3T3<sup>RasV12</sup> vs. 3T3<sup>RasV12</sup> and *Cebpb*<sup>-/-</sup>/Ras<sup>V12</sup>  
vs. Ras<sup>V12</sup> – MEFs. (106 genes)

**GeneSymbol**

1190003J15Rik  
9930013L23Rik  
A130040M12Rik  
Abcb1a  
Acpp  
Aim2  
Akr1b3  
Akr1c18  
Arrdc4  
Bcl2l15  
Bdkrb2  
Bid  
Bmp2k  
C3  
Camp  
Casp4  
Cck  
Ccl11  
Ccl7  
Ccr1  
Cd47  
Cebpb  
Cp  
Csf2  
Csf3  
Cxcl2  
Cyr61  
Ddit3  
Dock4  
Dram1  
Dst  
Eil2  
Ern1  
Fabp4  
Fah  
Fam82a1  
Fas  
Fgfr1op  
Fzd1  
Gadd45b  
Gbe1

Gdpd1  
Hp  
Ikbke  
Il13ra2  
Il18rap  
Il1a  
Il1rap  
Il6  
Irg1  
Ivl  
Junb  
Klra2  
Lce1i  
Lce3f  
Lcn2  
Lif  
Lox  
Lyz1  
Maff  
Map3k8  
Mmp8  
Nfkbiz  
Odc1  
Olr1  
Osmr  
P2rx4  
Pde4b  
Pim1  
Pion  
Plk2  
Prdx6  
Prl8a9  
Ptger2  
Ptprk  
Ptx3  
Pvrl2  
Raph1  
Rnf11  
S100a8  
Sbno2  
Serpinb9g  
Slc25a37  
Slco3a1  
Slfn2  
Slit2  
Slit3  
Slpi

Sod3  
Sprr2h  
Steap1  
Steap2  
Stom  
Tcfec  
Tmem38b  
Tnfaip3  
Tnip1  
Ttc39c  
Txnip  
Vcam1  
Vegfc  
Vgl3  
Wdyhv1  
Xdh  
Zc3h12a  
Zfpm2

Table 2f. Unique gene set common to both *Cebpb*<sup>-/-</sup>  
/Ras<sup>V12</sup> vs. Ras<sup>V12</sup> (MEFs) and *Cebpg*<sup>-/-</sup> vs. WT  
(MEFs). (48 genes)

**GeneSymbol**

2610019F03Rik

Abcb1b

Abcc4

Abcg1

Aif1l

Amot

Bnip3

Cbr3

Cd53

Celf4

Cpeb1

Creg1

Csf1

Cxcl16

Cxcl3

Dpp7

E030030I06Rik

Ero1l

Fmn2

Gpnmb

Gpr137b

Gpr64

Gsta4

Gzme

Hspa8

Il11

Lats2

Lce1h

Lmbrd1

Lrrc8d

Mapk13

Mmp12

Nap1l2

Pdk1

Penk

Rasgrp3

Rnd1

Rragd

Sema3e

Slc48a1

Slco4a1



Sorbs2

Stx3

Syt13

Syt17

Trf

Tslp

Zic1

Table 2g. Unique gene set common to C/EBP $\beta$ -3T3<sup>RasV12</sup> vs. 3T3<sup>RasV12</sup> and *Cebpg*<sup>-/-</sup> vs. WT (MEFs) and *Cebpb*<sup>-/-</sup>/Ras<sup>V12</sup> vs. Ras<sup>V12</sup> (MEFs). (47 genes)

**GeneSymbol**

Adm  
Ampd3  
Ass1  
Ccl2  
Cited2  
Clec4d  
Crct1  
Cxcl1  
Cxcl5  
Dtwd1  
Ereg  
Fam134b  
Fgf7  
Gda  
Gla  
Glrx  
Hmox1  
Ier3  
Il1r1  
Malat1  
Mcpt8  
Mgst1  
Mmp10  
Mmp13  
Mocos  
Mt2  
Neat1  
Nfkbia  
Pdk4  
Pdpn  
Plcx2  
Plek  
Plin2  
Ptges  
Ptgs2  
Rab20  
Rab32  
Rnasel  
Saa3  
Sbsn

Sema3c  
Sepp1  
Serinc3  
Sqrnl  
Thbd  
Tlr2  
U90926
